# Supplementary material for: Qualitative longitudinal research in health research: a method study
Source: BMC Med Res Methodol. 2022 Oct 1;22:255. doi: 10.1186/s12874-022-01732-4 (PMC9526289; doi:10.1186/s12874-022-01732-4)
Supplement: Supplementary file 6 — Additional file 6. Dataset [file 12874_2022_1732_MOESM6_ESM.xlsx]

## Sheet: Data
Reference	Authors	Year	Title	Journal	Country	Longitudinal terms used	Aim and research questions	Which type of population(s)	Phenomena of interest	Words related to longitudinal perspectives in aim and research questions	Context: Setting, location, or environment	Context: Part of larger research project	Context: Description of larger research project	Type of methodology	If other, how does the authors define methodology	Methodological litterature references	One or several types of data materials	Specify qualitative data material	Is there complimentary quantitative data	How long data collection time	Number of time points or data collection waves	Specify how article describe data collection practise over time	Number of participants (at 1st time point or total of participants)	Total amount of data material	Stated analysis method
Abel, G., & Thompson, L. (2018). 'I don't want to look like an AIDS victim': A New Zealand case study of facial lipoatrophy. Health & Social Care in the Community, 26(1), 41-47.	Abel and Thompson	2018	I don't want to look like an AIDS victim': A New Zealand case study of facial lipoatrophy	Health & Social Care in the Community	New Zealand	The study took a longitudinal qualitative approach (abstract)	This paper takes a longitudinal qualitative approach to explore one man’s struggle with the visible signs of HIV and the emotional toll this had on his life. It argues for the need for HIV treatment to look more broadly than just the reduction of viral load, and consider the physical, mental and social aspects essential for health and well- being. This paper presents a year of Tom’s emotional str…	Persons with HIV and facial lipoatrophy	experiences of living with HIV and facial lipoatrophy	(ongoing) journey longitudinal qualitative approach	Canterbury, New Zealand AIDS Foundation	yes	Fourteen participants (12 male and 2 female) agreed to take part and gave written consent. All participants took part in a face- to- face interview in 2013 and 11 of these participants were interviewed again 12	Case study		Corden, A., & Millar, J. (2007). Time and change: A review of the qualitative longitudinal research literature for social policy. Social Policy Society, 6, 583–592. Hansen, E. (2006). Successful qualitative health research: A practical introduction. Crows Nest: Allen and Unwin. Holland, J., Thomson, R., & Henderson, S. (2004). Feasibility study for a possible qualitative longitudinal study: Discu…	Several	Interviews and pictures	no	12 months	4 times	Fourteen participants (12 male and 2 female) agreed to take part and gave written consent. All participants took part in a face- to- face interview in 2013 and 11 of these participants were interviewed again 12 months later. One of the original participants died and two were lost to follow- up.Two participants were invited to take cameras home and take photographs to illustrate their experience o…	One man	4 interviews	A longitudinal approach to qualitative analysis is different from analysis of one- off interviews. It consists of analysis of each participant over the course of the study, following individual trajectories, and identifying critical moments and change (Thomson, 2007). The end product is a compelling case history for each participant highlighting the complexity of their experience (Shirani & Henwo…
Ahlstrom, L., Dellve, L., Hagberg, M., & Ahlberg, K. (2017). Women with neck pain on long-term sick leave-approaches used in the return to work process: A qualitative study. Journal of Occupational Rehabilitation, 27(1), 92-105.	Ahlstrom., Dellve, Hagberg, and Ahlberg,	2017	Women with Neck Pain on Long-Term Sick Leave-Approaches Used in the Return to Work Process: A Qualitative Study	Journal Of Occupational Rehabilitation	Sweden	The study was a longitudinal descriptive study with a constructing grounded theory approach described by Charmaz [35].	The aim of this study was to identify approaches used in the RTW (Return to Work) process among women with neck pain on long-term sick leave from human service organizations.	women with neck pain on long-term sick leave	approaches used in the RTW (Return to Work) process	process	The women in this study were all part of the Swedish sick leave system. This system changed in 2008, with eligibility for sickness benefits being now focused more on the individual’s work ability rather than the disability that caused the inability to work. Prior to this, individuals could be on long-term sick leave for an unlimited time. The new system aimed for and required more collaboration a…	yes	Quantitative studies have been reported earlier from this cohort [2, 6, 13, 36, 37], describing the cohort in detail. Data were collected from the answers to open-ended questions in this cohort study andcomplemented with 16 in-depth interviews.	Grounded theory		35. Charmaz K. Constructing grounded theory. 2nd ed. Great Britain: Sage; 2014. 40. Tong A, Sainsbury P, Craig J. Consolidated criteria for reporting qualitative research (COREQ): a 32-item checklist for interviews and focus groups. Int J Qual Health Care. 2007;19(6):349–57. doi:10.1093/intqhc/mzm042. 43. Glaser B. Doing grounded theory—issues and discussions. Carlifornia: Sociology Press; 1998.	Several	Written answers to open-ended questions from a cohort of women on long-term sick leave were used as data, and further complemented with qualitative indepth intensive interviews with women still suffering from neck pain. This method was considered suitable to help understand the rehabilitation and RTW process among these women, focusing on identifying these women’s experiences from their own persp…	no	72 months (6 years)	5 (4 open ended questions recurrent survey + one time interviews)	The open-ended questions from baseline, 6 months, 12 months, and 6 years were all used. The open-ended questions were concerned with facilitators for RTW, work adjustment, and experiences of sick leave and RTW.	16 interviews, 117 participants open-ended survey questions (1st time point)	These questions were answered 496 times in total (177 participants at baseline, 123 at 6 months, 86 at 12 months, and 110 at 6 years). ……….. Hence, 16 interviews were conducted.	constructivist grounded theory approach according to Charmaz [35],
Albrecht, T. A., Keim-Malpass, J., Boyiadzis, M., & Rosenzweig, M. (2019). Psychosocial experiences of young adults diagnosed with acute leukemia during hospitalization for induction chemotherapy treatment. Journal of Hospice & Palliative Nursing, 21(2), 167-173.	Albrecht, Keim-Malpass, Boyiadzis and Rosenzweig	2019	Psychosocial Experiences of Young Adults Diagnosed With Acute Leukemia During Hospitalization for Induction Chemotherapy Treatment	Journal of Hospice & Palliative Nursing	US	This study used a nested qualitative longitudinal design with a convenience sample. (abstract)	to examine the experiences of younger adults diagnosed with Acute leucemia who are actively receiving induction chemotherapy, to better direct the care deliveredby oncology and palliative care clinicians.	younger adults diagnosed with Acute leucemia	patient experience	none	Participants were recruited from the inpatient hematologyoncology unit of a quaternary academic medical center.	yes	The data for thisanalysis were collected within a larger mixed-methodsstudy that examined the supportive care needs of adultsreceiving treatment for AL.	other	The data for this analysis were collected within a larger mixed-methodsstudy that examined the supportive care needs of adultsreceiving treatment for AL.	Sandelowski M. Focus on research methods. Whatever happened to qualitativedescription? ResNursHealth. 2000;23:334-340. CohenMZ, KahnDL, Steeves RH. Hermeneutic Phenomenological Research: A Practical Guide for Nurse Researchers.Vol.2. Thousand Oaks, CA: Sage Publications; 2000. Lincoln Y, Guba E. Naturalistic Inquiry. Beverly Hills, CA: Sage Publications; 1985.	Several	All YAs completed semistructured interviews at enroll-ment and again at hospital discharge. The YAs were also provided a paper journal thatallowed them to maintain a journal about their experiencewhile hospitalized. Participants who chose to journal wereasked to write at least once week, detailing their experi-ence, challenges, and worries.	no	1 - 1.5 months	2	All YAs completed semistructured interviews at enroll-ment and again at hospital discharge, to determine if and/orhow participants’ needs and insights changed over the 4 to6 weeks of hospitalization.	7	14 interviews, 2 journals	Qualitative descriptive analysis with inductive thematicdevelopment guided this analysis
Allan, E. (2017). Community nursing middle management: 'dealing with different people in different time zones on both sides'. British Journal of Community Nursing, 22(9), 448-457.	Allan	2017	Community nursing middle management: 'dealing with different people in different time zones on both sides'	British Journal of Community Nursing	UK	A qualitative longitudinal interpretative phenomenological analysis	w What are CNMMs’ (Community nurse middle managers) perceptions of their role within CHPs (Community Health Partnerships)? w What are CNMMs’ experiences and views of negotiating and managing change within CHPs? w How do CNMMs understand the impact on themselves and others? w What sense do they make of this? w What does this mean in the context of wider understandings from the literature in Scotla…	Community nurse middle managers	their role within CHPs (Community Health Partnerships)	views of negotiating and managing change	Regional Health Boards in Scotland are charged with implementing NHS policies and plan the delivery of local health services including community health services in partnership with their local authority partners. Historically, CHPs evolved from Local Healthcare Co-operatives (LHCCs). Hopton and Hill’s (2001) positive evaluation of LHCCs supported the advancement of CHPs, which have evolved into t…			Phenomenology		Holloway I. Basic Concepts for Qualitative Research. Blackwell Science: Oxford; 1997 Denscombe M. The good research guide for small scale social research projects. Open University Press: Berkshire; 2007 Smith et al (2009) Groenewald T. A phenomenological research design illustrated. Int J Qualitative Methods. 2004;3(1) Bogdan RC, Biklen SK. Qualitative Research for Education: An Introduction to T…	One	Rowlands B (2005) Grounded in practice: using interpretive research to build theory. Electronic Journal of Business Research Methodology 3(1): 81–92 Holloway I. Basic Concepts for Qualitative Research. Blackwell Science: Oxford; 1997 Denscombe M. The good research guide for small scale social research projects. Open University Press: Berkshire; 2007 Smith JA. Qualitative methodology: analysing pa…	no	24 months (is shown in figure, very brief)	unclear, probably 2	Some 35 semi-structured interviews were conducted with 26 participants.	26 (total)	Some 35 semi-structured interviews were conducted with 26 participants.	The use of IPA involves a two-stage interpretation process to describe and interpret the perspective of the participant (Bogdan and Biklen, 2007) .
Alonso, W. W., Kitko, L. A., & Hupcey, J. E. (2018). Intergenerational caregivers of parents with end-stage heart failure. Research & Theory for Nursing Practice, 32(4), 413-435.	Alonso, Kitko and Hupcey	2018	Intergenerational Caregivers of Parents With End-Stage Heart Failure	Research & Theory for Nursing Practice	US	This study was a secondary analysis of qualitative data collected during a longitudinal study (abstract) …………… This study was a secondary analysis of longitudinal data collected from intergenerational caregivers of individuals with end-stage HF. (methodsection)	This study was undertaken to longitudinally examine the experiences of intergenerational young adult, adult, and older adult caregivers as they cared for a parent with end-stage HF (heart failure) in the context of the caregiver empowerment model (Jones, Winslow, Lee, Burns, & Zhang, 2011).	Intergenerational caregiver	experiences of young adult, adult, and older adult intergenerational caregivers caring for a parent with end-stage heart failure		caregivers recruited from one academic medical center serving rural, suburban, and urban patients and one inner city hospital, both located in central Pennsylvania, United States	yes	Data for this secondary analysis were taken from a longitudinal, qualitative descriptive study (NIH/NINR R01 NR013419) that investigated the end of life (EOL) trajectory of individuals with end-stage HF and their family. The primary study enrolled 100 individuals with end-stage HF and 102 of their unpaid, family caregivers.	Grounded theory		Tong, A., Sainsbury, P., & Craig, J. (2007). Consolidated criteria for reporting qualitative research (COREQ): A 32-item checklist for interviews and focus groups. International Journal for Quality in Health Care, 19(6), 349–357. http:// dx. doi. org/ 10. 1093/ intqhc/ mzm042 Murray, S. A., Kendall, M., Carduff, E., Worth, A., Harris, F. M., Lloyd, A., . . . Sheikh, A. (2009). Use of serial quali…	One	Longitudinal interviews from 23 young adult, adult, and older adult children who were caring for a parent with end-stage HF	no	24 months	seven times with interviews ranging from 2 to 14.	Individuals with HF and their caregivers were interviewed at monthly time intervals over twenty-four months or until the individual with HF died, whichever occurred first. In these 23 caregivers, 114 interviews were analyzed including 23 initial interviews, 80 follow-up interviews, and 11 post-death interviews. Intergenerational caregivers were interviewed an average of seven times with interview…	23	114 interviews included in this study. The initial interview was 45–60 minutes in length followed by shorter monthly interviews of 15–20 minutes.	Data were analyzed using qualitative thematic analysis, as described by Miles, Huberman, and Saldaña (2014) to draw out important themes among the intergenerational caregivers.
Alvarez, S., & Schultz, J.-H. (2019). Professional and personal competency development in near-peer tutors of gross anatomy: A longitudinal mixed-methods study. Anatomical Sciences Education, 12(2), 129-137.	Alvarez and Schultz	2019	Professional and Personal Competency Development in Near-peer Tutors of Gross Anatomy: A Longitudinal Mixed-methods Study	Anatomical Sciences Education	Germany	A Longitudinal Mixed-Methods Study (titel) ……………….. This study followed a longitudinal mixed-methods design, combining qualitative and quantitative research methods. (methods)	The purpose of this study was to explorethe professional and personal competencies peer tutors ofgross anatomy developed as a result of their tutoring activi-ties. It was hypothesized that because of the unique and chal-lenging environment of the gross anatomy course, tutors acquire competencies that match, and even go beyond those described in some of the competency catalogues used for curriculu…	medical students who are peer tutors	development of professional and personal competencies	developed	A anatomy course in a medical program.			other	This study followed a longitudinal mixed-methods design,combining qualitative and quantitative research methods.	Mayring P. 2014. Qualitative Content Analysis: Theoretical Foundation, Basic Procedures and Software Solution. 1st Ed. Klagenfurt, Austria: Leibniz-Institut f€ur Sozialwissenschaften. 144 p. URL: http://www.hitzler-soziologie.de/pdf/Pub likationen_Ronald/Sammelbaende/3-59.PDF [accessed 20 February 2018]	Several	structured interviews including rating each question on a scale	yes	unclear	3	The first interview was conductedat the beginning of the gross anatomy course, the secondabout 4–6 months later (toward the end of the gross anatomycourse or shortly after), and the third another 4–6 monthsafter the second interview. Thus, the tutors’ subjective compe-tency development was followed for a total of about18 months. (Thus unclear if data collection was 8-12 months as first described …	24	a total of 72 inter-views were conducted and a total of 72 questionnaires filledout.	structured content analysis (Mayring,2014)
Alves-Costa, F., Hamilton-Giachritsis, C., Christie, H., & Halligan, S. L. (2018). Self-perception of adaptation among homicidally bereaved individuals following a psychoeducational intervention: a UK longitudinal qualitative study. BMJ Open, 8(8), e020443-e020443.	Alves-Costa, Hamilton-Giachritsis, Christie and Halligan	2018	Self-perception of adaptation among homicidally bereaved individuals following a psychoeducational intervention: a UK longitudinal qualitative study	BMJ Open	UK	longitudinal qualitative study (title)	Thus, this study aimed to contribute to the literature by gathering the individuals’ perceptions about how they adjust posthomicide longitudinally. Furthermore, it sought to understand their perspectives on benefits 1. (main text) What changes occurred over time? 2. What was their perception of the benefits of a residential intervention? In abstract: This study aimed to explore how individuals pe…	participants of a psychoeducational intervention following traumatic experiences, particularly homicidal bereavement for those affected by serious crime, including homicide. Two different groups. 35 individuals who attended four consecutive groups were invited to take part in an interview 6 to 9 months after attending the EV intervention (short-term trajectory group—STG). Second, individuals who …	perception of change and progression related to an intervention	change and progression, short-term trajectory, long-term trajectory	Participants in this study attended a psychoeducational intervention offered by Escaping Victimhood (EV; a UK charity).	yes	part of a wider mixed method project. This study is a microstudy from a longitudinal mixed methods research project that adopts Pragmatism as philosophical model.	other	This study is a microstudy from a longitudinal mixed methods research project that adopts Pragmatism as philosophical model.	23. Johnson RB, Onwuegbuzie AJ. Mixed methods research: a research paradigm whose time has come. Educational Researcher 2004;33:14–26. 24. Maxcy SJ. Pragmatic threads in mixed methods research in the social sciences: The search for multiple modes of inquiry and the end of the philosophy of formalism. In: Handbook of mixed methods in social and behavioral research: Sage, 2003:51–89. 25. Sale JE, L…	One	qualitative telephone interviews were conducted with homicidally bereaved individuals 6–9 months and 2–5 years postintervention.	no	up to five years after intervention (but each individual is not followed over time)	2 (but different cohorts)	twenty-nine individuals (mainly females) took part: 14 as part of a 6–9-month follow-up (short-term trajectory group (STG) individuals—mean age 45.25) and 15 individuals (long-term trajectory group (LTG) individuals—mean age 48.50), retrospectively, 2 to 5 years postintervention.	In total, 14 individuals took part in the retrospective interview 6 to 9 months following the EV intervention. Two males and 12 females. Fifteen female participants agreed to take part in the interview 2–5 years after attending the EV intervention .	Interviews fron Twenty-nine individuals	inductive Thematic Analysis method
Andersen, I. C., Thomsen, T. G., Bruun, P., Bødtger, U., & Hounsgaard, L. (2017a). The experience of being a participant in one's own care at discharge and at home, following a severe acute exacerbation in chronic obstructive pulmonary disease: a longitudinal study. International Journal of Qualitative Studies on Health and Well-Being, 12(1), 1371994-1371994.	Andersen, Thomsen, Bruun, Bødtger and Hounsgaard	2017	The experience of being a participant in one's own care at discharge and at home, following a severe acute exacerbation in chronic obstructive pulmonary disease: a longitudinal study	International Journal Of Qualitative Studies On Health And Well-Being	Denmark	a longitudinal study (title) … The study was designed as a qualitative, longitudinal study (abstract)	To explore COPD (chronic obstructive pulmonary disease) patients’ experiences of participating in their care in the transitional period around discharge from hospital and in their own subsequent day-to-day care at home following a severe AECOPD (acute exacerbation in chronic obstructive pulmonary disease).	COPD (chronic obstructive pulmonary disease) patients’	experiences of participating in their care in the transitional period around discharge from hospital and in their own subsequent day-to-day care at home	transitional period	study was conducted in a department of respiratory medicine at a regional acute hospital in rural Denmark and in the participants’ own homes. In the department in which this study was conducted, the clinical pathway is organized so that, after being stabilized in an acute care or intensive care setting, patients are transferred to a respiratory medical ward for further treatment, stabilization an…	yes	This study is part of a larger, explorative study that involves both a patient and family perspective. Results concerning the meaning of family participation in care will be published separately. This article focuses solely on exploring the significance of patients’ experiences in going through the phases in the clinical pathway that include discharge, hospital follow-up visits and subsequent day…	Phenomenology	A phenomenological-hermeneutic approac, The design was longitudinal, and ethnographically-inspired fieldwork was used to explore the COPD illness and treatment trajectory during and after hospitalization for a severe AECOPD (Hounsgaard, Petersen, & Pedersen, 2007; Murray et al., 2009;Saldaña, 2003;Spradley, 1980).	Dreyer, P. S., & Pedersen, B. D. (2009). Distanciation in Ricoeur’s theory of interpretation: Narrations in a study of life experiences of living with chronic illness and home mechanical ventilation: Feature. Nursing Inquiry, 16(1), 64–73. doi:10.1111/j.1440-1800.2009.00433.x Ricoeur, P. (1976). Interpretation theory: Discourse and the surplus of meaning (6th ed.). Fort Worth, TX: Texas Christian…	Several	The methods of data collection were participant observations and interviews.	no	diverse, up to 18 months	2 interviews and two waves of observation	Description from figure: time 1, hospital observations; 1-10 months after discharge; 5-9 months after discharge, 11-18 months after dischargeThe study period and number of participant observations and interviews varied among the participants. The individual study period ranged from four days to 18 months. In-depth interviews were conducted with 10 patients on two occasions: in the middle and at t…	15	Out of the 15 patients, 10 completed the entire study.	A Ricoeur-inspired analysis proceeded on three levels: naïve reading, structural analysis and a critical interpretation and discussion
Andersen, I. C., Thomsen, T. G., Bruun, P., Bødtger, U., & Hounsgaard, L. (2018). Between hope and hopelessness: COPD patients' and their family members' experiences of interacting with healthcare providers – a qualitative longitudinal study. Scandinavian Journal of Caring Sciences, 32(3), 1197-1206.	Andersen, Thomsen, Bruun, Bødtger and Hounsgaard	2018	Between hope and hopelessness: COPD patients' and their family members' experiences of interacting with healthcare providers – a qualitative longitudinal study	Scandinavian Journal of Caring Sciences	Denmark	a qualitative longitudinal study (title)	Explore the meaning of COPD patients’ and their family members’ experiences of interacting with healthcare providers to their daily self-management over time.	COPD patients and family members	the meaning of patients’ and their family members’ experiences of interacting with healthcare providers to their daily self-management over time.	over time	department of respiratory medicine at a regional acute hospital in rural Denmark and in the participants’ own homes.	yes	This study is a part of a larger, qualitative longitudinal study designed to explore COPD patients’ and their family members’ experiences related to a coherent part of the treatment and illness trajectory during and after a hospitalisation for a severe AECOPD . The study was conducted in a department of respiratory medicine at a regional acute hospital in rural Denmark and in the participants’ ow…	Phenomenology	qualitative longitudinal study	26 Salda~na J. Longitudinal Qualitative Research: Analyzing Change Through Time. 2003, AltaMira Press, Walnut Creek, CA. 27 Dreyer PS, Pedersen BD. Distanciation in Ricoeur’s theory of interpretation: narrations in a study of life experiences of living with chronic illness and home mechanical ventilation: feature. Nurs Inquiry 2009; 16: 64–73. 28 Ricoeur P. Interpretation Theory: Discourse and th…	Several	participant observations, individual and joint interviews	no	18 months	3	The path of the data collection is illustrated in Figure 1. The individual study periods ranged from the stay during hospitalisation up to 18 months, and the participants underwent different treatment and illness trajectories. Therefore, throughout the study, each patient was followed differently by the data-collecting researcher. The final data set comprised 22 interviews and various field notes.	17 (10 patients and 7 family members)	The final data set comprised 22 interviews and various field notes.	A phenomenological–hermeneutical approach was used to interpret the data.Data were analysed by use of the Ricoeur-inspired method on three levels: na€ıve reading, structural analysis and critical interpretation and discussion
Andersen, I. C., Thomsen, T. G., Bruun, P., Bødtger, U., & Hounsgaard, L. (2017b). Patients' and their family members' experiences of participation in care following an acute exacerbation in chronic obstructive pulmonary disease: A phenomenological-hermeneutic study. Journal Of Clinical Nursing, 26(23), 4877-4889.	Andersen, Thomsen, Bruun, Bødtger and Hounsgaard	2017	Patients' and their family members' experiences of participation in care following an acute exacerbation in chronic obstructive pulmonary disease: A phenomenological-hermeneutic study	Journal Of Clinical Nursing	Denmark	This study adopted a longitudinal design informed by ethnographic fieldwork principles. (abstract)	The aim of this study was to explore COPD patients’ and their family members’ experiences of both participation in care during hospitalisation for an AECOPD, and of the subsequent day-to-day care at home.	patients’ and their family members’	experiences of both participation in care during hospitalisation and experiences of care at home	during hospitalisation for an AECOPD, and of the subsequent day-to-day care	a respiratory medical ward and an outpatient clinic in a regional acute hospital in Denmark. The interviews were conducted at hospital or in the participants’ homes.	yes	no, but several articles are included in the review	Phenomenology	The study was performed within a phenomenological-hermeneutic approach inspired by the French philosopher Paul Ricoeur’s theory of narrative and interpretation (Dreyer & Pedersen, 2009; Ricoeur, 1976). Furthermore, as shown in Figure 1, ethnographically inspired fieldwork with complementary participant observations in different hospital settings and serial ethnographic interviews at the participa…	Salda~na, J. (2003). Longitudinal qualitative research: Analyzing change through time. Walnut Creek, CA: Alta Mira Press. Dreyer, P. S., & Pedersen, B. D. (2009). Distanciation in Ricoeur’s theory of interpretation: Narrations in a study of life experiences of living with chronic illness and home mechanical ventilation: Feature. Nursing Inquiry, 16,64–73. Ricoeur, P. (1976). Interpretation theory…	Several	Participant observations supplemented with informal interviews were undertaken to explore the relationship between the participants and healthcare professionals in different contexts within the hospital. ……………. of each series of participant observations was between 20 min and four hours, adjusted to the situations observed. Ongoing field notes, including direct quotations, were undertaken to ensu…	no	11 to 18 months	3 (unspecific)	Data collection was performed over 18 months, from autumn 2014 to spring 2016…… Because of the flexibility of the study, the study period and number of series of participant observations and interviews varied among the participants. The individual study periods ranged from 4 days to 18 months. Although a study period of 12 months had been planned, it became necessary to modify this according to c…	15 patients 12 family members	Participant observations phase 1: 15 patients + 12 family members, phase 2: individual interviews 11 patients, 6 family members, 5 joint interviews, phase 3 patients 10, family members 5, 5 joint intervuews	phenomenological-hermeneutic
Armuand, G., Wettergren, L., Nilsson, J., Rodriguez-Wallberg, K., & Lampic, C. (2018). Threatened fertility: A longitudinal study exploring experiences of fertility and having children after cancer treatment. European Journal of Cancer Care, 27(2), e12798-e12798.	Armuand, Wettergren, Nilsson, Rodriguez-Wallberg and Lampic	2018	Threatened fertility: A longitudinal study exploring experiences of fertility and having children after cancer treatment	European Journal Of Cancer Care	Sweden	A longitudinal study (title) ……… longitudinal interview study (abstract) ………. A longitudinal qualitative research design (method section)	The aim of this study was, therefore, to explore how men and women experience the threat of infertility and their thoughts about having children after cancer during the first 2 years following diagnosis.	couples	experience the threat of infertility and their thoughts about having children after cancer	during the first 2 years following…	oncology and haematology wards at a university hospital in Sweden	no		other	longitudinal qualitative research design	Krippendorff, K. (2013). Content analysis. An introduction to its methodology (3rd edn). Los Angeles: Sage publications Inc. Graneheim, U. H., & Lundman, B. (2004). Qualitative content analysis in nursing research: Concepts, procedures and measures to achieve trustworthiness. Nurse Education Today, 24(2), 105–112. https://doi. org/10.1016/j.nedt.2003.10.001 S0260691703001515 [pii]	One	Individual interviews	no	21 months	2	29 individuals who met the inclusion criteria were identified, and 21 (10 men and 11 women) participated in the study and completed the first interview. Those who declined participation most commonly indicated that the topic was not important to them, as they either regarded themselves as too old or already had the desired number of children. Two years later (between August 2011 and May 2013), 16…	29 individuals who met the inclusion criteria were identified, and 21 (10 men and 11 women) participated in the study and completed the first interview	37 interviews	analysed with qualitative content analysis
Arnolds, M., Xu, L., Hughes, P., McCoy, J., & Meadow, W. (2018). Worth a try? Describing the experiences of families during the course of care in the neonatal intensive care unit when the prognosis is poor. The Journal of Pediatrics, 196, 116-122.e113.	Arnolds, Xu, Hughes, McCoy and Meadow	2018	Worth a Try? Describing the Experiences of Families during the Course of Care in the Neonatal Intensive Care Unit When the Prognosis is Poor.	The Journal Of Pediatrics	US	This longitudinal, semistructured, qualitative interview study (method section)	This study illuminates the experience of families during an infant’s admission as well as after discharge or death.	parents to infants	parents’ experience of their child being in the NICU	during admission and after discharge	University of Chicago (U of C) Comer NICU, which is a tertiary care center with the capacity for 70 beds serving a primarily low-income,AfricanAmerican population, and the Evanston Infant Special Care Unit	no		other	longitudinal, semistructured, qualitative interview study	12. Giacomini MK,Cook DJ. for the Evidence-BasedMedicineWorking Group. Users’ guides to the medical literature: XXIII. Qualitative research in health care A. Are the results of the study valid? JAMA 2000;284:35762.	One	joint interviews	yes	6 months to 12 months different for various families, Followup interviews were completed at an average of 435 days of life (range, 259-750 days)	2	Of the 38 eligible families, 17 were interviewed at the UofC over the study period (June 2014-June 2015) and 9 families out of 20 eligible families were interviewed at Evanston Hospital over the study period (November 2014-November 2015). Every family who completed an initial interview was contacted for a follow-up interview. Seventeen families (65%) could be reached for follow-up interviews and …	26 families	43 interviews, (26 +18 eller 17 interviews = 44 eller 43 interviews (according to the Figure and table))	thematic analysis (abstract), in article not stated.
Asada, Y., Gilmet, K., Welter, C., Massuda-Barnett, G., Kapadia, D. A., & Fagen, M. (2019). Applying theory of change to a structural change initiative: Evaluation of model communities in a diverse county. Health Education & Behavior, 46(3), 377-387.	Asada, Gilmet, Welter, Massuda-Barnett, Kapadia and Fagen	2019	Applying Theory of Change to a Structural Change Initiative: Evaluation of Model Communities in a Diverse County	Health Education & Behavior	US	The main objective of this study was to apply findings from the longitudinal multiple case study evaluation to (abstract)	this article examines the application of a ToC framework (the theory of change) that guided planning, implementation, and evaluation of the Model Communities grant program (2011-2012) that was funded to suburban Cook County as one component of the CPPW (Communities Putting Prevention to Work) initiative.	The final sample consisted of grantee organizations from two local municipalities, two school districts, one school district foundation, and one community-based organization receiving funds to work for health behaviours. From each Model Communities organization, a maximum of six participants were selected for interviews: two repre-sentatives from each Model Communities grantee (desig-nated by the…	planning, implementation and evaluation of the Model Communities grant program	planning, implementation and evaluation. Also states years 2011-2012.	In March 2010, the Cook County Department of Public Health, the state-certified public health authority for nearly all of suburban Cook County, in collaboration with the Public Health Institute of Metropolitan Chicago, was awarded nearly $16 million as part of the CPPW initiative to imple-ment chronic disease-related structural change interventions to make healthy eating and active living the eas…			Case study	longitudinal multiple case study design	Yin, R. K. (2009). Case study research: Design and methods (5th ed). Thousand Oaks, CA: Sage. doi:10.1097/FCH.0b013e318 22dda9e; Patton, M. Q. (2015). Qualitative research & evaluation methods (4th ed). Thousand Oaks, CA: Sage.; Miles, M. B., Huberman, A. M., & Saldaña, J. (2014). Qualitative data analysis: A methods sourcebook. Thousand Oaks, CA: Sage.	One	Individual interviews	no	unclear	Three waves of data collection were conducted to reflect initial, middle, and final time points.	Not stated, might vary between the different organisations?	A total of six Model Communities: total number of interviewed participants is unclear.	A total of 97 interviews were conducted, 89 of which were conducted in-person, 7 via phone, and 1 via e-mail.	not stated. Referes to Saldana and Miles & Huberman
Asamane, E. A., Greig, C. A., Aunger, J. A., & Thompson, J. L. (2019). Perceptions and factors influencing eating behaviours and physical function in community-dwelling ethnically diverse older adults: A longitudinal qualitative study. Nutrients, 11(6).	Asamane, Greig, Aunger and Thompson	2019	Perceptions and Factors Influencing Eating Behaviours and Physical Function in Community-Dwelling Ethnically Diverse Older Adults: A Longitudinal Qualitative Study	Nutrients	UK	A Longitudinal Qualitative Study (titel)	The present study uses a longitudinal qualitative design to: (1) identify and compare factors influencing eating behaviours and physical function among ethnic older minorities living in Birmingham, United Kingdom; and (2) understand how these factors and their association with healthy eating and physical function changed over 8 months	ethnic older minorities	factorsinfluencing eating behaviours and physical function	changed over 8 month	The research was conducted in the wider Birmingham area, West Midlands, UK. In this geographicarea, ethnic minorities (non-white) comprise 46.9% of the population, with the largest being South Asians(22.6%). The population of ethnic minorities increased in this region by 12.4% from 2001 to 2011, andwith the current projected population growth of 7.2% by 2026, the non-white population is expected …	no		Phenomenology	Also states: longitudinal qualitative design	22. Corden, A.; Millar, J. Qualitative Longitudinal Research for Social Policy–Introduction to Themed Section. Soc. Policy Soc. 2007, 6, 529–532. [CrossRef] 23. Tong, A.; Sainsbury, P.; Craig, J. Consolidated Criteria for Reporting Qualitative Research (Coreq): A 32-Item Checklist for Interviews and Focus Groups. Int. J. Qual. Health Care 2007, 19, 349–357. [CrossRef] 26. Patton, M. Qualitative R…	One	Individual interviews		8 months	2	Using this interview guide, two in-depth qualitative interviews (baseline and 8-month follow-up)were conducted.	92	173 interviews (92 +81)	directed content analysis (Elo Kyngäs)
Bagot, K. L., Moloczij, N., Barclay-Moss, K., Vu, M., Bladin, C. F., & Cadilhac, D. A. (first published 2018). Sustainable implementation of innovative, technology-based health care practices: A qualitative case study from stroke telemedicine. Journal of Telemedicine and Telecare, 2020, 26(1–2) 79–91.	Bagot, Moloczij, Barclay-Moss, Vu, Bladin and Cadilhac	2018	Sustainable implementation of innovative, technology-based health care practices: A qualitative case study from stroke telemedicine	Journal Of Telemedicine And Telecare	Australia	none	The aim of this study was to identify factors to support the sustainability of an innovative technology-based programme beyond the initial implementation phases.	health professionals, but two different groups that have had the intervention for 6 /12 months	facilitating factors	beyond the initial phase	metropolitan.egional hospital, with a catchment population of almost 308,000, approximately 200km from Melbourne, Australia. and regional clinicians involved in the Victorian Stroke Telemedicine (VST) programme pilot	yes	Data has been collected earlier, before intervention, in the same projekt, this is a followin up	Case study		35. Stake RE. The art of case study research. London: Sage, 1995. 38. Tong A, Sainsbury P and Craig J. Consolidated criteria for reporting qualitative research (COREQ): A 32-item checklist for interviews and focus groups. Int J Qual Health Care 2007; 19: 349–357. 40. Ritchie J, Lewis J and Elam G. Designing and selecting samples. In: Ritchie J and Lewis J (eds) Qualitative research practice: A gu…	One	Individual interviews	no, only background variables	6 months	two time-points	No datacollection over time, instead datacollection with participants with different lengt of experience of the intervention	12 and 13, different groups, not the same group followed over time	49 interviews	Analysed inductively and deductively using descriptive thematic analysis in order to identify common patterns and important themes.41
Balmer, D. F., Devlin, M. J., & Richards, B. F. (2017). Understanding the relation between medical students' collective and individual trajectories: An application of habitus. Perspectives on Medical Education, 6(1), 36-43.	Balmer, Devlin and Richards	2017	Understanding the relation between medical students' collective and individual trajectories: an application of habitus	Perspectives On Medical Education	US	As part of a longitudinal case study (method)	Thus, we posed another research question in this secondary analysis, ‘How might the concept of habitus speak to the relation between collective trajectories and individual trajectories of medical students?’	medical students	concept of habitus speak to the relation between collective trajectories and individual trajectories	collective trajectories and individual trajectories	22 medical students at Columbia University College of Physicians and Surgeons (USA) over their four years of training. Habitus is not a standalone concept, but rather to be considered in concert with two related concepts: field and capital. A field is a structured, social space with its own rules and traditions that shape how individuals and groups interact for the purpose of acquiring resources …	yes	Building on these studies, we used Bourdieu’s Theory of Practice to interpret interview data derived from a four-year, longitudinal study of medical students [11]. We observed how the field of undergraduate medical education shifted from an academic context in the preclinical phase to a clinical context in students’ major clinical year.	Case study	As part of a longitudinal case study - secondary analysis	12. Gilligan C, Spencer R, Weinberg K, Bertsch T. On the Listening Guide: a voice-centered relational model. In: Hesse-Biber S, Leavy P, eds. Emergent Methods in Social Research. Thousand Oaks, CA: Sage Publications; 2006:157–72. 13. Edwards R, Weller S. Shifting analytic ontology: using I-poems in qualitative longitudinal research. Qual Res. 2012;12:202–17.	One	Individual interviews	no	30 months (34-4 because 4 was base-line)	5	For this secondary data analysis, we reviewed peak experience narratives from the 19 students whom we interviewed three times in the preclinical phase (at 4, 9 and 16 months into a total of 48 months, or 4 years, of medical school) and twice in the clinical phase (at 22 and 34 months into medical school)	19	95 peak experience narratives generated by 19 students in the secondary analysis (five narratives for each student)	We borrowed a novel approach to analyzing students individual habitus from longitudinal psychological research called I-poems
Baloh, J., Zhu, X., & Ward, M. M. (2018). Types of internal facilitation activities in hospitals implementing evidence-based interventions. Health Care Management Review, 43(3), 229-237.	Baloh, Zhu and Ward	2018	Types of internal facilitation activities in hospitals implementing evidence-based interventions	Health Care Management Review	US	longitudinal qualitative research design	To examine internal facilitation activities at ten critical access hospitals in rural Iowa during their implementation of TeamSTEPPS, a patient safety intervention, and to identify characteristics that distinguish different types of facilitation activities(from the abstract)	10 hospitals	facilitation activites	implementation over time	A total of 14 CAHs attended the 2011 and 2012 Master Trainer Training offered by the Iowa Department of Public Health FLEX program and Telligen, Iowa’s Quality Improvement Organization.	no		other	longitudinal qualitative research design where we prospectively studied implementation	Patton MQ (2014). Qualitative research & evaluation methods (4th ed.). Thousand Oaks, CA: SAGE Publications. Bradley EH, Curry LA, & Devers KJ (2007). Qualitative data analysis for health services research: Developing taxonomy, themes, and theory. Health Services Research, 42(4), 1758–1772. [PubMed: 17286625] Harvey G, Loftus-Hills A, Rycroft-Malone J, Titchen A, Kitson A, McCormack B, … Seers K …	One	Site visits and semistructured interviews were conducted quarterly for 2 years, beginning when hospital staff returned from Master Traner Training. A total of 281 interviews were conduted with 77 keay informants	no	24 months	8(?), quarterly for two years	Site visits and semi-structured interviews were conducted quarterly for two years, beginning when hospital staff returned from Master Trainer Training.	77 key informants, including the mastrer trainers, executive sponsors, uint or department managers, and frontline staff involved in the teamsstepps implementation ................... It is 10 hospitals being examed and their are different persons being interview during a period of 24 months, total number of participants not described	281 interviews were conducted with 77 key informants	comparative analysis
Baretta, D., Perski, O., & Steca, P. (2019). Exploring users' experiences of the uptake and adoption of physical activity apps: Longitudinal qualitative study. JMIR Mhealth And Uhealth, 7(2), e11636-e11636.	Baretta, Perski and Steca	2019	Exploring Users' Experiences of the Uptake and Adoption of Physical Activity Apps: Longitudinal Qualitative Study	JMIR Mhealth And Uhealth	Italy	Longitudinal Qualitative Study (titel)	The aim of this study was to guide the selection of design features to implement in Physical Activity apps for nonclinical, adult populations. Through a combination of think-aloud methodology and in-depth interview techniques, this study examined (1) what features potential users expect to be important for engagement with PA apps during first exposure to never-used, randomly allocated, and commer…	adults using physical activity apps	experience of design features in physical activity apps	experiences after 2 weeks’ usage	Italian, adult, nonclinical population not meeting the PAguidelines and interested in using an app to increase PA.Participants were recruited in the Italian county of Lombardy	no		other	not described (describes data collection method)	23. Jaspers MW, Steen T, van den Bos C, Geenen M. The think aloud method: a guide to user interface design. Int J Med Inform 2004 Nov;73(11-12):781-795. [doi: 10.1016/j.ijmedinf.2004.08.003] [Medline: 15491929] 24. Morse J. Theoretical Saturation. In: Lewis-Beck MS, Bryman AE, Futing Liao T, editors. The SAGE Encyclopedia of Social Science Research Methods. Thousand Oaks: SAGE Publications; 2004.…	Several	semi-structured interviews, think aloud interviews at baseline	yes	0.5 months	2	The baseline session included a pretask interview, a think-aloud task, and asemistructured interview (see Multimedia Appendix 1). After taking part in the baseline session, participants were asked touse the app for 2 weeks. No specific instructions were providedin terms of app use (eg, frequency or duration of use) to avoid influencing users’ engagement with and experiences of the app. Participan…	20	37 interviews	inductive thematic analysis
Barros Ferreira, E., Oliveira de Almeida Marques da Cruz, F., Alves Costa de Jesus, C., Moura Pinho, D. L., Kamada, I., & Diniz dos Reis, P. E. (2017). Telephone contact as a strategy for the promotion of comfort to the patient submitted to chemotherapy. Journal of Nursing UFPE, 11(5), 1936-1942.	Barros Ferreira, Oliveira de Almeida Marques da Cruz, Alves Costa de Jesus, Moura Pinho, Kamada and Diniz dos Reis	2017	TELEPHONE CONTACT AS A STRATEGY FOR THE PROMOTION OF COMFORT TO THE PATIENT SUBMITTED TO CHEMOTHERAPY	Journal of Nursing UFPE	Brazil	longitudinal, prospective, quantitative-qualitative study, (abstract)	This study aimed to monitor the adverse effects of antineoplastic chemotherapy in patients undergoing outpatient treatment and to describe the telephone follow-up as a strategy to provide comfort, according to the assumptions of Katherine Kolcaba.	patients undergoind chemotherapy	monitor the adverse effects of antineoplastic chemotherapy …………… describe the telephone follow-up as a strategy to provide comfort	follow up	at the High Complexity in Oncology Center (CACON) of the University Hospital of Brasília (HUB), located in Brasília, Federal District. This center offers, on an outpatient basis, oncological treatments in the modalities of antineoplastic chemotherapy and radiotherapy.	no		other	longitudinal, prospective, quantitative-qualitative study,	I metoden enbart två ref på spanska. Vet ej om dessa är metodartiklar.	Several	Recorded phone consultations, Subsequent Nursing consultations were conducted weekly by telephone, and seven (07) telephone contacts were performed, with each participant followed, with a one-week interval between the two. During the telephone conversation, the patient was asked about the occurrence of signs and symptoms related to the adverse effects of antioneoplastic chemotherapy, and how comf…	yes	1,75 months (7 weeks)	7	All patients were followed up by weekly telephone contact (TC) for seven weeks, totaling 147 telephone contacts.	21	All patients were followed up by weekly telephone contact (TC) for seven weeks, totaling 147 telephone contacts.	content analysis, Quantitative data were analyzed using descriptive statistics using Microsoft® Excel software. The qualitative data were analyzed following the steps recommended by the Content Analysis
Barthel, S., Belton, S., Raymond, C. M., & Giusti, M. (2018). Fostering children's connection to nature through authentic situations: The case of saving salamanders at school. Frontiers in Psychology, 9, 928-928.	Barthel, Belton, Raymond and Giusti	2018	Fostering Children's Connection to Nature Through Authentic Situations: The Case of Saving Salamanders at School	Frontiers In Psychology	Sweden	longitudinal case study (abstract), ……………… Qualitative and longitudinal research design (method)	The aim of this paper is to increase our understanding about if, how and by which means children’s affective relationships with nature change by taking part in a nature conservation project during school hours, and if such a shift persists 2 years postparticipation. Does participating in the Salamander Project at school strengthen children’s connection to nature? If so, how do children learn to c…	children (10 yrs old)	childrens' relationship with nature,	change, shift, persist, over time	schoolchildren in Sweden	no		other	qualitative and longitudinal research design	Beery, T., and Wolf-Watz, D. (2014). Nature to place: rethinking the environmental connectedness perspective. J. Environ. Psychol. 40, 198–205. doi: 10.1016/j. jenvp.2014.06.006 Patton, M. (2002). Qualitative Research and Evaluation Methods. Thousand Oaks, CA: Sage Publications. Yin, R. (2009). Case Study Research. Los Angeles, CA: SAGE Publications. Creswell, J. W. (2014). Research Design: Quali…	Several	semi-structured interview questions and open-ended questions included in a questionnaire ,field observations	no	24 months	5	in a table with timepoints and different data collection methods: During the first round of data collection, nine field observations of the conservation project took place over a 2-month period. Students completed a short questionnaire after completion of the Salamander Project (June 2015).. During the final days of the project, 25 children who had participated in the project were interviewed... …	57 questionnaries 25 interviews	106 questionaries, 49 interviews, 9 field observations	Interviews from both waves of data collections were transcribed verbatim and coded for emerging themes, using the software program Dedoose
Bélanger, M., Wolfe Phillips, E., O'Rielly, C., Mallet, B., Aubé, S., Doucet, M., Couturier, J., Mallet, M., Martin, J., Gaudet, C., Murphy, N. & Brunet, J. (2017). Longitudinal qualitative study describing family physicians' experiences with attempting to integrate physical activity prescriptions in their practice: 'It's not easy to change habits'. BMJ Open, 7(7), e017265-e017265.	Bélanger, Phillips, O'Rielly, Mallet, Aubé, Doucet, Couturier, Mallet Martin, Gaudet, Murphy and Brunet	2017	Longitudinal qualitative study describing family physicians' experiences with attempting to integrate physical activity prescriptions in their practice: 'It's not easy to change habits'	BMJ Open	Canada	Longitudinal Qualitative Study (title)	We aimed to explore how their (family physicians who were new recipients of physical activity prescription pads) prescription habits changed (if at all) over time and to identify barriers and enablers to writing physical activity prescriptions for their patients.	family physicians	prescription habits changed (if at all) over time and to identify barriers and enablers to writing physical activity prescriptions	habits changed (if at all) over time	There are an estimated 208 family physicians practising in the Greater Moncton Area. ………….. The Moncton Census Metropolitan Area has a population of 144 810, with 65% speaking English and 32% speaking French as their first language.30 With the majority of the workforce commuting to its urban core for work, Moncton presents as an urban economy with a lower than national average unemployment rate.3…	no	unclear but not described as a part of a larger study. This action aligns with results from a previous study where we reported that primary care providers identified a lack of tools (eg, prescription pads) as a barrier to writing physical activity prescriptions.28	other	not described	34. Braun V, Clarke V. Using thematic analysis in psychology. Qual Res Psychol 2006;3:77–101. 35. Glaser B. The constant comparative method of qualitative analysis. Soc Probl 1965.	One	Individual interviews, The interview guide included open-ended questions and probes. Participants were asked about their experiences of implementing written physical activity prescriptions into their practice	no	12 months	4	Participants were first interviewed in January 2015, and then again 2, 4 and 12 later (ie, after receiving the physical activity prescription pads). ………………… The timing of follow-up interviews was based on previous research 33 and was meant to cover the estimated median time required to form the habit of prescribing physical activity (2 months; first follow-up), the time when we could expect the 7…	11	43 interviews	thematic analysis
Bengtsson, M., Sjöblom, Y., & Öberg, P. (2018). Young care leavers' expectations of their future: A question of time horizon. Child & Family Social Work, 23(2), 188-195.	Bengtsson, Sjöblom and Öberg	2018	Young care leavers' expectations of their future: A question of time horizon	Child & Family Social Work	Sweden	The results are based on qualitative longitudinal data (abstract) ……………….. The data are based on the first and second waves of a longitudinal qualitative study of 15 young care leavers (aged 16–21) in Sweden, who had been placed in out‐of‐home care for at least 1 year. (methods)	The aim of this paper is to study young care leavers' own expectations of their future during their transition from care to independent adulthood. How, while still in care, do they express their expectations of this transition, and do these expectations change while they are taking their first step towards an independent life?	Young people	transtion	transition	out-of home care in Sweden	no		other	longitudinal qualitative stud	Patton, M. Q. (2015). Qualitative research & evaluation methods: Integrating theory and practice. Thousand Oaks, CA: SAGE Publications, Inc. Thomas, D. R. (2006). A general inductive approach for analyzing qualitative evaluation data. American Journal of Evaluation, 27(2), 237–246. Lincoln, Y. S., & Guba, E. G. (1985). Naturalistic inquiry. Beverly Hills, CA: Sage Publications. Grinnell, R. M., &…	One	Individual interviews, the interviews were guided by six major themes: subjectiv health, being in placement, the present life siutation, planning for the transition to independent life, avaiability of social support and ffuture plans. The second interview was done by telephone 6-9 monght afther ther discharge an revolved around the themes transition from placement, challenges and support during t…	no, only background variables	6-9 months	2	The first interview (T1) was carried out face to face with the informants who were still in care but were planning their discharge. Besides initial questions about their background (name, age, and time in placement), the interviews were guided by six major themes: subjective health, being in placement, the present life situation, planning for the transition to independent life, availability of so…	15	30 interviews	general inductive approach
Bernays, S., Paparini, S., Seeley, J., & Rhodes, T. (2017). "Not taking it will just be like a sin": Young people living with HIV and the stigmatization of less-than-perfect adherence to antiretroviral therapy. Medical Anthropology, 36(5), 485-499.	Bernays, Paparini, Seeley and Rhodes	2017	Not Taking it Will Just be Like a Sin: Young People Living with HIV and the Stigmatization of Less-Than-Perfect Adherence to Antiretroviral Therapy	Medical Anthropology	Uganda, US, UK, and Ireland	we present findings from a longitudinal qualitative study (abstract)	In this article, we present findings from a longitudinal qualitative study with young people (age 10–22) living with HIV in Uganda, US, UK, and Ireland embedded within an international HIV clinical trial (BREATHER (Penta 16) Trial Group 2016), and we analyze young people’s narratives of treatment adherence negotiations and revelations in clinical encounters.	young people (age 10–22) living with HIV	narratives of treatment adherence negotiations and revelations in clinical encounters	none	Overall, 102 interviews were conducted with 43 young people: 26 in Uganda from one clinic (Kampala), seven in the UK and Ireland from three clinics (London, Nottingham and Dublin), and 10 in the US from one clinic (Memphis, TN). All clinics were urban centers, widely regarded as national “centers of excellence.” They had a good staff-to-patient ratio and are well funded and in the UK and Ireland …	yes	BREATHER international clinical trial. ………… The primary objective of the BREATHER randomized, non-inferiority clinical trial was to determine whether or not efavirenz-based ART in short cycles of five days on and two days off (short-cycle therapy; SCT) was as efficacious in maintaining virological suppression as continuous efavirenz-based ART (continuous therapy; CT) in young people living with H…	other	not described	no methodological references	Several	Individual interviews, Extensive field notes were also collected by all researchers for each meeting, describing the encounter between researcher and participants, interview environment, and conversations prior and after the interview. Observations were also carried out at trial-related events, including study meetings and dissemination of trial findings in the clinic. ....................... We …	no	unclear	3	unclear, …………. We interviewed young people at repeated times during the trial, for approximately 1–2 hours per interview. Baseline interviews covered life with HIV on ART as described by young people and included, but did not focus specifically on, young people’s perceptions ofthe trial or ofSCT. The second interview reconstructed the life and treatment trajectory of participants since the start …	43	102 interviews	thematic analysis
Bernet, M., Sommerhalder, K., Mischke, C., Hahn, S., & Wyss, A. (2019). "Theory does not get you from bed to wheelchair": A qualitative study on patients' views of an education program in spinal cord injury rehabilitation. Rehabilitation Nursing, 44(5), 247-253.	Bernet, Sommerhalder, Mischke, Hahn and Wyss	2019	Theory Does Not Get You From Bed to Wheelchair: A Qualitative Study on Patients' Views of an Education Program in Spinal Cord Injury Rehabilitation	Rehabilitation Nursing	Switzerland	Design: Longitudinal qualitative study (abstract)	The purposeof the current study was, therefore, to evaluate the newnurse-guided Pationt Education program in Spinal Cord Injury rehabilitation, with a particular focus on the patients'perspectives and experiences. The study focused on two areas: (1) to analyze the program’s impact on patients’preparation for their everydaylife at home after rehabilitation and (2) to reveal which aspects of the PE…	persons with SCI	the pro-gram’s impact on patients’preparation for their everydaylife at home after rehabilitation	were most valuable from the participants’perspective - after six months experiences upon what worked well	The study took place at a private,globally recognized clinic specializing in SCI primarycare and rehabilitation in Switzerland.	no		other	not described (describes data collection method)	Mayring, P. (2008). Qualitative Inhaltsanalyse: Grundlagen und Techniken 10., neu ausgestattete Aufl [Qualitative content analysis: Foundations and techniques 10].Weinheim:Beltz Verlag.	One	Individual interviews		5-6 months	2	The first interview took place shortly before their discharge from the clinic, and the second one was 5–6 months later.	10	20 interviews	content analysis
Beryl, L. L., Rendle, K. A. S., Halley, M. C., Gillespie, K. A., May, S. G., Glover, J., Yu, P., Chattopadhyay, R. & Frosch, D. L. (2017). Mapping the decision-making process for adjuvant endocrine therapy for breast cancer. Medical Decision Making, 37(1), 79-90.	Beryl, Rendle, Halley, Gillespie, May, Glover, Yu, Chattopadhyay and Frosch	2017	Mapping the Decision-Making Process for Adjuvant Endocrine Therapy for Breast Cancer	Medical Decision Making	USA	A longitudinal series of semistructured interviews (abstract) a longitudinal, qualitative study (rational)	To help fill this gap in understanding, we present data from a longitudinal, qualitative study of women undergoing breast cancer treatment. We pay particular attention to patterns of uncertainty and change in women’s decisions over time. We use detailed, qualitative data to characterize the multiple dimensions of the decision-making process and to consider how the chronic care decision-making pro…	women undergoing breast cancer treatment	patterns of uncertainty and change in women’s decisions over time	change in women’s decisions over time decision-making process	Participants were recruited from 3 geographically separate clinics within a single multispecialty health care organization in Northern California.			other	a longitudinal, qualitative study	19. Glaser BG, Strauss AL. The Discovery of Grounded Theory: Strategies for Qualitative Research. Transaction Publishers; 2009. New Brunswick, NJ, and London, UK. 20. Dohan D, Abramson CM, Miller S. Beyond Text: Using Arrays of Ethnographic Data to Identify Causes and Construct Narratives. Chicago: University of Chicago; 2012. Available from: https:// sites.google.com/site/ajs2012conference/2011-…	One	Individual interviews, At each visit, patients participated in a semistructured interview, which included questions about the decisions patients faced concerning surgery, chemotherapy, radiation, hormone therapy, and/or breast reconstruction; the factors shaping the patients’ decisions; and their perceptions of the outcomes of the various decisions. In addition, at the baseline interview, patient…	no	ca 9,3 months	4	We collected data from participants at 4 time points during the course of their treatment. The baseline visit (T1) was conducted a mean (SD) of 57 (20) days after diagnosis. The second visit (T2) was conducted approximately a mean (SD) of 97 (24) days after diagnosis, and the third visit (T3) was conducted about 167 (37) days after diagnosis. The last visit (T4) was conducted at the end of active…	41 newly diagnosed breast cancer patients	not described	constant comparative method
Bharmal, M., Guillemin, I., Marrel, A., Arnould, B., Lambert, J., Hennessy, M., & Fofana, F. (2018). How to address the challenges of evaluating treatment benefits-risks in rare diseases? A convergent mixed methods approach applied within a Merkel cell carcinoma phase 2 clinical trial. Orphanet Journal of Rare Diseases, 13(1), 95-95.	Bharmal, Guillemin, Marrel, Arnould, Lambert, Hennessy and Fofana	2018	How to address the challenges of evaluating treatment benefits-risks in rare diseases? A convergent mixed methods approach applied within a Merkel cell carcinoma phase 2 clinical trial	Orphanet Journal Of Rare Diseases	Germany	longitudinal qualitative interviews (methods)	To overcome the challenge of evaluating meaningfulness of treatment effect from a patient-reported perspective in the context of this rare cancer, a mixed methods approach that followed a convergent design was used [28]. In this study, qualitative interviews were performed with the patients participating in the JAVELIN Merkel 200 trial; in parallel, patients’ overall response by Independent Endpo…	adults aged at least 18 years who had chemotherapy-refractory, with histologically confirmed MCC (Merkel cell carcinoma, rare skinn cancer) and had failed at least one line of chemotherapy	evaluating meaningfulness of treatment effect from a patient-reported perspective	evaluating	not described. Just trail	yes	The single-arm, open-label, multicentre, international phase 2 JAVELIN Merkel 200 trial (NCT02155647) was conducted to evaluate the efficacy and safety of avelumab in patients with distant metastatic MCC.	other	A convergent mixed methods design	30. Kaufman H, Kraemer M, Barbosa CD, Lambert J, Mahnke L, Bharmal M. Patient perspectives on Merkel cell carcinoma (MCC) and its treatment with a novel agent (AVELUMAB): findings from in-depth qualitative patient interviews. Value Health. 2016;19(7):A745. 31. Friese S. Qualitative data analysis with ATLAS.Ti, 2nd edition edn: London: SAGE Publications Ltd; 2014. 32. Strauss A, Corbin J. Basics o…	Several	Individual interviews	yes	6,25 months, 25 weeks	3	Upon acceptance, patients were offered to be interviewed at three pre-defined time-points during the clinical trial: at baseline prior to receiving the study treatment avelumab and at study Week 13 and Week 25 (i.e. 12 weeks and 24 weeks after first administration of avelumab during study Week 1) if they had not discontinued the study prior to that time points.	19	19 accepted to be interviewed at baseline prior to receiving study treatment; of those 19 patients, 12 were interviewed at Week 13, and 10 at Week 25. A total of nine patients were interviewed at all three time-points and had a clinical status assessment.	thematic analysis approach
Bilodeau, K., Tremblay, D., & Durland, M.-J. (2019). Return to work after breast cancer treatments: Rebuilding everything despite feeling "in-between". European Journal of Oncology Nursing, 41, 165-172.	Bilodeau, Tremblay, Dur and M.-J.	2019	Return to work after breast cancer treatments: Rebuilding everything despite feeling "in-between"	European Journal of Oncology Nursing	Canada	this longitudinal qualitative study (abstract)	We propose targeting a turning point in the survival experience, i.e. the end of active cancer treatments. The goal of this study is therefore to describe the Return To Work journey of Breast cancer survivors from the end of active treatments through their return to work and job retention.	women after breast cancer treatment	return to work jouney	journey	Nine women who had been diagnosed with breast cancer wererecruited, all from the same geographic region in Quebec (Canada)(Table 1). Women who had had a relapse of their breast cancer wereexcluded because they were unlikely to RTW (Canadian PartnershipAgainst Cancer, 2012). The decision was made to restrict the samplingto women who had at least received chemotherapy treatments, becausethis is an …	no		other	Interpretative Description method	Thorne, S., 2016. Interpretive Description: Qualitative Research for Applied Practice. Routledge. Miles, M.B., Saldaña, J., Huberman, A.M., 2014. Qualitative Data Analysis : a Methods Sourcebook, third ed. SAGE Publications, Inc., Thousand Oaks, Califorinia.	One	Individual interviews		unclear. Total data collection for the study were within 9 months. Unclear about individual cases.	3	The interviews were performed at the end of cancer treatments (n = 9), one month before RTW (n = 9), and after Return To Work (n = 5). twenty-three semi-directed interviews were conducted over a nine-month period after curative cancer treatments. The interviews took place one month after chemotherapy and radiation treatments (n = 9), one month before RTW (n = 9), and after RTW (n = 5). After the …	9	23 interviews	qualitative content analysis
Birt, L., Poland, F., Charlesworth, G., Leung, P., & Higgs, P. (2019). Relational experiences of people seeking help and assessment for subjective cognitive concern and memory loss. Aging & Mental Health, 1-9.	Birt, Pol , Charlesworth, Leung and Higgs	2019	Relational experiences of people seeking help and assessment for subjective cognitive concern and memory loss	Aging & Mental Health	UK	Data were collected using longitudinal qualitative interviews. (abstract) …………. a longitudinal interview study (methods)	to understand the experiences of those who seek help from a primary care doctor for subjective cognitive concerns, but who do not receive a cognitive assessment. We also report the experiences of patients who have experienced cognitive assessments from diverse health providers, reporting processes and procedures which disrupt their trust in the process of cognitive assessment.	people experience cognitive concerns	patient experiences of experiencin cognitive concerns	processes and procedures which disrupt their trust in the process of cognitive assessment	Participants were recruited from four regions: East Anglia,London, East Midlands and East Yorkshire. Within NHS sites,clinical research staff searched memory clinic lists for peo-ple who met the inclusion criteria and sent out study infor-mation			other	nterpretive constructivist approach	Schwandt, T. A. (1998). Constructivist, interpretivist approaches to human inquiry. In N.K. Denzin & Y.S. Lincoln (Eds.), The landscape of qualitative research: theories and issues (pp. 221–259). Thousand Oaks CA: Sage Publications. Patton, M. Q. (2002). Qualitative research and evaluation methods (3rd ed.). Thousand Oaks, California: Sage Publications Inc. Jensen, E. A., & Laurie, C. (2016). Doi…	One	Individual interviews		12–15 months.	2	Semi-structured interviews were carried out between June 2015 and October 2017. The follow-up interview was undertaken after 12–15 months.	41	77 interviews	Thematic analys
Blagden, N., & Wilson, K. (2019). "We're all the same here"- Investigating the rehabilitative climate of a re-rolled sexual offender prison: A qualitative longitudinal study. Sexual Abuse, 1-24.	Blagden and Wilson	2019	We're All the Same Here-Investigating the Rehabilitative Climate of a Re-Rolled Sexual Offender Prison: A Qualitative Longitudinal Study	Sexual Abuse	UK	A Qualitative Longitudinal Study	This study aims to explore the qualitative changes in the rehabilitative climate of a re-rolled prison (in this case, a general prison turned into a prison only for individuals who have sexually offended) from just after the re-roll to a year later. 1. To understand how individuals with sexual convictions experience a prison for only that client group, the challenges they face, and the opportunit…	individuals in prison for a sexual crime	rehabilitative climate	qualitative changes in the rehabilitative climate …… from just after the re-roll to a year later…………. the challenges they face, and the opportunities to change and whether such experiences change over time	a general prison turned into a prison only for individuals who have sexually offended. ............... As can be noted, five participants had completed the SOTP Core version, which was a prison-based cognitive-behavioral program for medium-to-high-risk individuals with sexual convictions (see Beech, Oliver, Fisher, & Beckett, 2005). However, no further program information was available to the aut…	no		other	not described	McCoy, L. K. (2017). Longitudinal qualitative research and interpretative phenomenological analysis: Philosophical connections and practical considerations. Qualitative Research in Psychology, 14, 442-458. doi:10.1080/14780887.2017.1340530 Willig, C. (2008). Introducing qualitative research methods in psychology. Maidenhead, UK: McGraw-Hill. Reid, K., Flowers, P., & Larkin, M. (2005). Exploring l…	One	Individual interviews	no	12 months	2	Time Point 1 was 6 months into the re-roll and Time Point 2 was approximately a year later and just over 18 months after the re-roll. Time Point 1 was chosen because although 6 months into the re-roll is early in the prison change process, it allowed enough time for the initial disruption to have settled. Time Point 2 is a year later and 18 months into the process, hence allowing enough time for …	10	In total, eight participants were interviewed in both phases of the research, with an additional two participants in both Time Point 1 and Time Point 2.	phenomenologically oriented strand of thematic analysis, as described by Braun and Clarke (2006)
Bolier, M., Doulougeri, K., de Vries, J., & Helmich, E. (2018). 'You put up a certain attitude': a 6-year qualitative study of emotional socialisation. Medical Education, 52(10), 1041-1051.	Bolier, Doulougeri, Vries and Helmich	2018	You put up a certain attitude': a 6-year qualitative study of emotional socialisation	Medical Education	the Netherlands	In this longitudinal study, 12 medical students participated in annual, individual, semi-structured interviews, (abstract) …………….. The aim of this longitudinal qualitative study (aim in article)	The aim of this longitudinal qualitative study was to gain a better understanding of the socialisation of emotion in the process of becoming a doctor.	medical students	socialisation of emotion in the process of becoming a doctor	process	This study was carried out in one medical school in the eastern part of the Netherlands. Like all medical schools in the Netherlands, it has a 6-year curriculum, with the first 3 years, leading to a Bachelor’s degree, being mostly theoretical, and the last 3 years, resulting in a Master’s degree, largely clinical.	no		other	longitudinal qualitative study	27 Braun V, Clarke V. Using thematic analysis in psychology. Qual Res Psychol 2006;3 (2):77–101. 28 King N, Horrocks C. Interviews in Qualitative Research. Thousand Oaks, CA: Sage Publications Ltd 2010.	One	Individual interviews	no	72 months - 6 years	5	For this purpose, the students were interviewed about their experiences annually, except for Year 2 because of the lack of clinical experience in that year. ………….. At the end of a 6-year period, we had collected up to five in-depth interviews for every student, each lasting approximately 1 hour. These interviews captured the range of clinical practice settings (i.e. from entering medical school u…	17	For the initial study, we purposively sampled 17 medical students (Year 1, 2010),2 of whom 12 participated in the second interview (Year 3, 2012), 11 participated in the third interview (Year 4, 2013) and eight stayed involved during clerkships until graduation (Years 5 and 6, 2014–2016).	thematic analysis
Bomsta, H., & Sullivan, C. M. (2018). IPV survivors’ perceptions of how a flexible funding housing intervention impacted their children. Journal of Family Violence, 33(6), 371-380.	Bomsta and Sullivan	2018	IPV Survivors’ Perceptions of How a Flexible Funding Housing Intervention Impacted Their Children	Journal of Family Violence	US	The current qualitative, longitudinal study (abstract)	The current study, then, presents IPV survivors’ perceptions of how a brief intervention designed to enhance their safety and housing stability also impacted their children’s well-being.	mothers experienced intimate partner violence	intervention designed to enhance their safety and housing stability also impacted their children’s well-being	housing stability	Survivors in this sample had all sought help at the Housing Resource Center ofthe District Alliance for Safe Housing (or DASH), in Washington, D.C. DASH offers a range ofoptions including emergency shelter, scattered site transitional housing, flexible funding and advocacy.	yes	Data were drawn from a qualitative, longitudinal evaluation of a brief intervention that included flexible funding and brief advocacy (Sullivan et al. 2016).	other	Data were drawn from a qualitative, longitudinal evaluation of a brief intervention	Miles, M., Huberman, A., & Saldana, J. (2014). Qualitative data analysis: A methods sourcebook. Incorporated: SAGE Publications.	One	Individual interviews		6 months	3	Over 18 months, IPV survivors who received the flexible funding intervention delivered by DASH were invited to be interviewed by phone three times over six months about the impact of the program on their safety, housing stability and well-being. Of the 55 survivors participating in the larger study (see author citation), 42 were mothers of minor children .............. Survivors were interviewed …	42	At Time 1 (30 days after receipt ofthe funds), 95% (40 of42) ofmothers were interviewed.1 At Time 2 (3 months after receiving the funds), the retention rate was 93% (39 of42). For Time 3 (6 months), 90% (38 of42) ofmothers were contacted. In all, 36 ofthe 42 mothers (86%) completed all three interviews.	Qualitative analyses
Boström, M., Ernsth Bravell, M., Björklund, A., & Sandberg, J. (2017). How older people perceive and experience sense of security when moving into and living in a nursing home: A case study. European Journal of Social Work, 20(5), 697-710.	Boström, Ernsth Bravell, Björklund and Berg	2017	How older people perceive and experience sense of security when moving into and living in a nursing home: a case study	European Journal of Social Work	Sweden	a qualitative, longitudinal case study design (methods)	Therefore, a longitudinal design with in-depth interviews and observations was used in order to highlight sense of security by the older person when moving into and living in nursing home.	older persons	sense of security by the older person when moving into and living in nursing home	when moving into and living in	nursing homes - no setting described	yes	The present study represents one of four studies in a dissertation work that contributes to greater understanding of how older persons with varying needs of care perceive and experience security.	Case study		McLeod, J., & Elliott, R. (2011). Systematic case study research: A practice-oriented introduction to building an evidence base for counselling and psychotherapy. Counselling & Psychotherapy Research, 11(1), 1–10. doi:10.1080/14733145. 2011.548954 Anthony, S., & Jack, S. (2009). Qualitative case study methodology in nursing research: An integrative review. Journal of Advanced Nursing, 65(6), 1171…	Several	Individual interviews. Data were collected longitudinally through in-depth interviews and participant observations at different occasions and in different settings during the study. The first interview took place either in each participant’s home or in a short-term facility before the move to a nursing home. Thereafter, interviews and observations were undertaken in the participants’ flats at the…	no	3 to 4 months	4	1st interview 1-3 days before the move, 2nd interview 3-5 days after the move, observation of implementation plan meeting with participant and nurse 2-4 weeks after the move + short follow up interview, 4th interview 12-16 weeks after the interview	Two women (87 and 88 years old) and one man (91 years old) participated in the study and represent the three cases.	9 interviews, 3 short follow up intervies, 3 observations; The naïve field notes from observations were combined with the verbatim transcriptions of interviews in one 326-page document.	content analysis
Braaf, S., Ameratunga, S., Ponsford, J., Cameron, P., Collie, A., Harrison, J., Ekegren, C., Christie, N., Nunn, A., & Gabbe, B. (2019). Traumatic injury survivors' perceptions of their future: A longitudinal qualitative study. Disability and Rehabilitation, 1-11.	Braaf, Ameratunga, Ponsford, Cameron, Collie, Harrison, Ekegren, Christie, Nunn and Gabbe	2019	Traumatic injury survivors' perceptions of their future: a longitudinal qualitative study	Disability And Rehabilitation	Australia	A Longitudinal Qualitative Study (titel)	this study aims to explore seriously injured adults’ perceptions of their future including their concerns, anxieties, coping mechanisms, and sources of resilience over time.	seriously injured adults	perceptions of their future includ-ing their concerns, anxieties, coping mechanisms, and sources ofresilience	over time	This longitudinal qualitative study was undertaken in Victoria,Australia, with survivors of serious injury. The state of Victoria hasan inclusive trauma system that ensures the most seriouslyinjured patients are directed to the most appropriate hospital fortheir injuries [24]. Eight-one percent of trauma patients are defini-tively managed at one paediatric and two adult hospitals definedas major …	yes	The RESTORE (REcovery after Serious Trauma—Outcomes,Resources use and patient Experiences) study is a population-based longitudinal cohort study that captures the experiences ofseriously injured people at 3, 4 and 5 years post-injury throughquantitative and qualitative methods [26]. This paper focuses onthe nested longitudinal qualitative component of the RESTOREproject.	other	not described (describes data collection method)	Ritchie J, Spencer L. Qualitative data analysis for applied policy research. In: Bryman A, Burgess R, editors. Analyzing qualitative data. London: Routledge; 1994. p. 173–194. [29] Grossoehme D, Lipstein E. Analyzing longitudinal qualitative data: the application of trajectory and recurrent crosssectional approaches. BMC Res Notes. 2016;9:136. [30] Salda~na J. Longitudinal qualitative research: a…	One	Individual interviews		24 months	3	Of the 66 seriously injured people interviewed at 3 years post-injury, 63 were interviewed again at 4 years and 57 participants at 5 years.	66	186 interviews	hematic analysis was undertaken using a framework approach
Bradley, E. H., Brewster, A., L., McNatt, Z., Linnander, E. L., Cherlin, E., Fosburgh, H., Ting, H. H., Curry, L. A. (2018). How guiding coalitions promote positive culture change in hospitals: a longitudinal mixed methods interventional study. BMJ Quality & Safety, 27(3), 218-225.	Bradley, Brewster, McNatt, Linn. Cherlin, Fosburgh, Ting and Curry	2018	How guiding coalitions promote positive culture change in hospitals: a longitudinal mixed methods interventional study	BMJ Quality & Safety	US	a longitudinal mixed methods interventional study (titel) …………	Accordingly, we sought to understand what distinguished hospitals that succeeded to shift culture substantially and to reduce 30-day RSMR (risk-standardised mortality rate) after AMI (acute myocardial infarction) through participation in the LSL (Leadership Saves Lives) collaborative.	hospitals are the unit of analysis, participants: Coalition members included staff from multiple departments (eg, cardiology, emergency medicine, pharmacy, cardiac quality improvement, rehabilitation), professions (eg, physicians, nurses, technologists, administrators, physician assistants) and levels of the organisation (from senior executives to front-line staff).	shift culture during an intervention	shift culture	hospitals wards for acute myocardial infarct	yes	We used quantitative and qualitative data from a longitudinal, convergent mixed methods interventional study39 40 in which 10 of 12 hospitals approached (participation rate 83%; table 1) participated in a quality collaborative to improve aspects of organisational culture shown to be associated with lower 30-day RSMR after AMI. .............. The 2-year detail,13 intervention, previously described…	other	longitudinal, mixed methods intervention study	39 Creswell JW, Plano Clark VL. Designing and conducting mixed methods research. 2nd ed. Los Angeles: Sage Publications, 2011. 40 Curry L, Nunez-Smith M. Mixed methods in health sciences research: a practical primer. Los Angeles: Sage, 2015. 41 Patton MQ. Qualitative research & evaluation methods. 3 ed. Thousand Oaks, Calif: Sage Publications, 2002. 47 Bradley EH, Curry LA, Devers KJ. Qualitative…	Several	The survey was administered to all guiding coalition members at baseline, 12 months and 24 months. In addition, we used a standard discussion guide (see online supplementary appendix C) to conduct in-person, in-depth interviews41 of guiding coalition members at baseline, 6 months and 18 months. Lasting on average an hour, the interviews generated extensive qualitative data. We also conducted 56 h…	yes	18 months collection	3 timepoints for interviews; 2 time points for observations	In addition, we used a standard discussion guide (see online supplementary appendix C) to conduct in-person, in-depth interviews41 of guiding coalition members at baseline, 6 months and 18 months.	total 197, not clear how many that were followed over time.	Survey response rates at baseline, 12-month and 24-month waves were 88% (147/168), 83% (154/186) and 94% (167/178), respectively. We also conducted 393 in-depth interviews at baseline (n=162), 6 months (n=118) and 18 months (n=113) with a total of 197 individual respondents (table 2).	constant comparative method
Brietzke, M., & Perreira, K. (2017). Stress and coping: Latino youth coming of age in a new latino destination. Journal of Adolescent Research, 32(4), 407-432.	Brietzke & Perreira	2017	Stress and Coping: Latino Youth Coming of Age in a New Latino Destination	Journal Of Adolescent Research	US	longitudinal qualitative design	Our study aimed to contextualize the processes of stress and coping among Latino adolescents growing up in an emerging Latino destination in the US—North Carolina (NC). (abstract)	Latino adolescents	contextualize the processes of stress and coping	processes	growing up in an emerging Latino destination in the US—North Carolina. All adolescents in our study were either the first or second generation children of immigrants from Latin American countries including Colombia, El Salvador, Honduras, and Mexico.	yes	We used qualitative interview data collected for the Southern Immigrant Academic Adaptation (SIAA) study, a multi-site, mixed-methods study designed to understand the high school experiences of the first- and second-generation Latino children of immigrants who settled in NC in the early 1990s. The SIAA study collected survey data from 239 first-year students enrolled in high school in 2006–07 and…	other	not described	Miles, MB., Huberman, AM. Qualitative data analysis: An expanded sourcebook. Thousand Oaks, CA: SAGE Publications, Inc; 1994. Maxwell JA, Miller BA. Categorizing and connecting strategies in qualitative data analysis. Handbook of Emergent Methods. 2008:461–477.	One	Individual interviews		36 months, (3 years)	2	This yielded a total of 18 dyads (mother child) at baseline (T1). In 2009–10 (T2), an effort was made to contact all 18 youth and their mothers for a second interview. Of the 18 mother-adolescent dyads interviewed in 2006–07, we were able to contact and re-interview 12 adolescents and 11 mothers. One female adolescent was estranged from her family and living with a male romantic partner at T2. Si…	12	This analysis focuses on the 24 interviews we conducted with 12 of our adolescents in both 2006–07 and 2009–10. Data from maternal interviews were not the focus of this study.	Following Miles and Huberman (1994)
Bright, F. A. S., Kayes, N. M., McPherson, K. M., & Worrall, L. E. (2018). Engaging people experiencing communication disability in stroke rehabilitation: A qualitative study. International Journal of Language & Communication Disorders, 53(5), 981-994.	Bright, Kayes, McPherson and Worrall	2018	Engaging people experiencing communication disability in stroke rehabilitation: a qualitative study	International Journal of Language & Communication Disorders	New Zealand	A qualitative study using the Voice Centred Relational Approach. Longitudinal observational and interview data were gathered… (abstract)	The aim of this research was to develop rich understandings of the process of engagement for people experiencing communication disability after stroke and, in particular, to examine how rehabilitation practitioners worked to engage patients throughout rehabilitation.	people experiencing communication disability after stroke and their providers	the process of engagement for people experiencing communication disability after stroke	the process of engagement	The research was located within a rehabilitation service in a district health board of a large city in New Zealand. Rehabilitation was provided in both an inpatient unit and a community-based service. The inpatient unit provided multidisciplinary rehabilitation for 2–12 weeks, depending on patient needs and priorities. The community service provided intensive community (home)-based rehabilitation…	yes	This research was embedded within a wider study ofpatient engagement in stroke rehabilitation (Bright 2016). This wider study had two components: an interviewbased study exploring howpeople experiencing communication disability and practitioners conceptualized and experienced engagement; and an observational study exploring how engagement was enacted in inpatient and community-based rehabilitatio…	other	The research was underpinned by the Voice Centred Relational Approach (VCRA), a qualitative methodology that attends to the different voices (perspectives and stories) within a person’s communication (Mauthner and Doucet 1998).	MAUTHNER,N.S.andDOUCET, A., 1998, Reflections on a VoiceCentred Relational Method ofdata analysis: analysing maternal and domestic voices. In J. Ribbens and R. Edwards (eds), Feminist Dilemmas in Qualitative Research: Private Lies and Public Texts (London: Sage), (pp. 119–144). KAGAN, A., 1998, Supported conversation for adults with aphasia: methods and resources for training conversation partner…	Several	Subsequent observations were event sampled, observing events that were anticipated to be data rich as informed by previous data collection (i.e., a dyad in which one or both parties reported strong engagement), or were common events (e.g., ward round), or represented a variety offorms ofinteraction (e.g., informal interactions in the dining room). All interactions were audio-recorded with most ev…	no	0,5 months	unclear	The primary mode of data collection was observations. Most interactions between each patient– practitioner dyad were observed in the first 2 weeks of rehabilitation.	Twenty-eight patient–practitioner dyads participated in this research, involving three patients and 28 rehabilitation practitioners. One patient participated twice: once as an inpatient and once as a community service user, meaning this study has three patient participants over four rehabilitation episodes	Data were gathered through multiple means: observations of clinical interactions, team and family meetings (n = 160 observations over 147 h); interviews with participants (n = 108); and stimulated recall interviews with practitioner participants (n = 5)	The Listening Guide was the primary analysis technique
Brooks, H., Lovell, K., Bee, P., Fraser, C., Molloy, C., & Rogers, A. (2019). Implementing an intervention designed to enhance service user involvement in mental health care planning: A qualitative process evaluation. Social Psychiatry & Psychiatric Epidemiology, 54(2), 221-233.	Brooks, Lovell, Bee, Fraser, Molloy and Rogers	2019	Implementing an intervention designed to enhance service user involvement in mental health care planning: a qualitative process evaluation	Social Psychiatry & Psychiatric Epidemiology	UK	A longitudinal, qualitative process evaluation (abstract)	This manuscript reports on the nested qualitative process evaluation informed by implementation theory which aimed to explore the impact of the EQUIP training package to enhance user involvement in care planning.	Semi-structured interviews were undertaken by the lead author with service users, carers and mental health profes-sionals from both control and intervention teams at three time points	the impact of the EQUIP training package to enhance user involvement in care planning	process evaluation		yes	The EQUIP intervention aimed to enhance service user and carer involvement in the care planning process through a 2-day training package targeted at all members of commu-nity mental health teams (CMHTs) responsible for providing care to people with serious mental health problems such as schizophrenia or bipolar disorder in ten NHS mental health trusts. Professionals in CMHTs come from a range of …	other	This manuscript reports on the nested qualitative process evaluation informed by implementation theory which aimed to explore the impact of the EQUIP training package to enhance user involvement in care planning.	29. Tong A, Sainsbury P, Craig J (2007) Consolidated criteria for reporting qualitative research (COREQ): a 32-item checklist for interviews and focus groups. Int J Qual Health Care 19(6):349–357 31. Braun V, Clarke V (2006) Using thematic analysis in psychology. Qual Res Psychol 3(2):77–101 32. Richie J, Spencer L (1994) Qualitative data analysis for applied policy research. In: Bryman A, Burges…	Several	Semi-structured interviews were undertaken by the lead author with service users, carers and mental health profes-sionals from both control and intervention teams at three time points		12 months	3	three time points (baseline and 6 and 12 months post-intervention)	54	34 semi-structured interviews	thematic analysis
Brown, D. (2019). Changes in communication tensions for men facing prostate cancer: A longitudinal study. Journal of Communication in Healthcare, 12(1), 44-53.	Brown	2019	Changes in communication tensions for men facing prostate cancer: a longitudinal study	Journal of Communication in Healthcare	New Zealand	a longitudinal study (titel) ………… This longitudinal, interpretive study (methods)	In an effort to better understand tensions over time, the principle aims of the presentstudy are to establish if and how they change aftermen have undergone a prostate biopsy. Three research questions guided this study: RQ1: How were the communication tensions of a group of men waiting for the result of a prostate biopsy initially (T1) resolved three years later (T2)? RQ2: What new communication …	men undergone prostate bioppsy	experience of prostade biopsy, communication tension,	understand tensions over time; change	not described	no	not described	other	not described (describes data collection method)	[31] Giacomini MK, Cook DJ. Users’ guides to the medical literature: XXIII. Qualitative research in health care A. Are the results of the study valid? J Am Med Assoc. 2000;284(3):357–362. [32] Morse J. The significance of saturation. Qual Health Res. 1995;5(2):147–149. [33] Aronson J. A pragmatic view of thematic analysis. The qualitative report [internet]. 1994;2(1). Available from: http://www.n…	One	Individual interviews		36 months	2	For the original study in 2012, 41 men were approached by a urologist to participate. Four men were excluded because of prior diagnosis of prostate cancer, and one man declined the invitation, resulting in a cohort of 36 men. All the men received the outcome of their prostate biopsy after the first interview and around half the men subsequently received a diagnosis of prostate cancer (now referre…	25	50 interviews	Thematic analysis
Busza, J., Dauya, E., Bandason, T., Simms, V., Chikwari, C. D., Makamba, M., Mchugh, G., Munyati, S., Chonzi, P., & Ferrand, R. A. (2018). The role of community health workers in improving HIV treatment outcomes in children: Lessons learned from the ZENITH trial in Zimbabwe. Health Policy and Planning, 33(3), 328-334.	Busza, Dauya, Ason, Simms, Chikwari,Makamba, McHugh, Munyati, Chonzi, Ferr and R. A.	2018	The role of community health workers in improving HIV treatment outcomes in children: lessons learned from the ZENITH trial in Zimbabwe	Health Policy And Planning	Zimbawe	conducted longitudinal, qualitative semi-structured interviews (abstract)	The aim was to give a voice to the central actors of a CHW (community health workers) programme that successfully met its goals, reflect on how use of a criteria-based framework during intervention design affected CHWs’ (community health workers) delivery, job satisfaction and motivation, and consider implications for the programme’s future scale-up and adoption in other settings.	community health workers	experience of programme that successfully met its goals, reflect on how use of a criteria-based framework during intervention	none		yes	As part of a process evaluation of the ZENITH trial, we reviewed the intervention’s performance against the Hermann et al criteria, with specific attention to CHWs’ own perceptions and experiences. ……………… The development and content of the ZENITH intervention are described elsewhere (Busza et al. 2014). In summary, CHWs provided 12–15 structured household visits adapted from an existing strengths…	other	We conducted longitudinal semi-structured qualitative interviews with the 19 CHWs who delivered the ZENITH intervention at three time periods during the trial: baseline (following recruitment and training but before home visits work started), midline (after 1 year of implementation of the intervention) and at the end of the intervention 2 years later, prior to unblinding.	none	One	Individual interviews	no	24 months	3	We conducted longitudinal semi-structured qualitative interviews with the 19 CHWs who delivered the ZENITH intervention at three time periods during the trial: baseline (following recruitment and training but before home visits work started), midline (after 1 year of implementation of the intervention) and at the end of the intervention 2 years later, prior to unblinding.	19	we completed all 3 interviews with the remaining 19	thematic content analysis (without reference)
Busza, J., Simms, V., Dziva Chikwari, C., Dauya, E., Bandason, T., Makamba, M., McHughc, G., & Ferrand, R. A. (2018). “It is not possible to go inside and have a discussion”: How fear of stigma affects delivery of community-based support for children’s HIV care. AIDS Care, 30(7), 903-909.	Busza, Simms, Dziva Chikwari, Dauya, Ason, Makamba, McHugh, Ferr and R. A.	2018	“It is not possible to go inside and have a discussion”: how fear of stigma affects delivery of community-based support for children’s HIV care	AIDS Care	Zimbawe	longitudinal qualitative study	We investigated how stigma affected a community-based intervention to support caregivers of children newly diagnosed with HIV in Harare, Zimbabwe. Specifically, we assessed children’s, caregivers’, and CHWs’ perceptions of how HIV-related stigma affected implementation.	children’s, caregivers’, and CHW (community health workers)	how stigma affected a community-based intervention to support caregivers of children newly diagnosed with HIV	implementation	Harare, Zimbabwe	yes	Results of the ZENITH trial are reported elsewhere (Ferrand et al., 2017), but briefly, 166 children were randomly allocated to home visits and 168 to routine clinic care. At the end of follow up, 86% of enrolled children had initiated ART and a significantly higher proportion of children in the intervention arm were virologically suppressed 12 months after ART initiation. This was the first stud…	other	Within a trial evaluating community-based support for caregivers of newly HIV diagnosed children in Harare, Zimbabwe, we conducted a longitudinal qualitative study to explore how stigma affected delivery and acceptance of the intervention.	Bradley, E. H., Curry, L. A., & Devers, K. J. (2007). Qualitative data analysis for health services research: Developing taxonomy, themes, and theory. Health Services Research, 42(4), 1758–1772. doi:10.1111/j.1475-6773.2006.00684.x ; Hennink, Kaiser, & Marconi, 2017) Hennink, M. M., Kaiser, B. N., & Marconi, V. C. (2017). Code saturation versus meaning saturation. Qualitative Health Research, 27(…	One	Individual interviews	no	18 months	2 timepoints for CHW interviews, care-providers were interviewed at 2 timepoints but different care providers	We conducted semi-structured interviews with caregivers of children receiving the intervention 12 and 18 months after enrolment. ………….. At 12 months we interviewed 26 caregivers, but found that we reached thematic saturation after analysing 7–8 transcripts (i.e., we found broad agreement across themes with few outliers, suggesting additional sampling would be unlikely to yield new insights) (Brad…	care givers: 26+10; children: 15; Community health workers: 20	At 12 months we interviewed 26 caregivers, but found that we reached thematic saturation after analysing 7–8 transcripts (i.e., we found broad agreement across themes with few outliers, suggesting additional sampling would be unlikely to yield new insights) (Bradley, Curry, & Devers, 2007; Hennink, Kaiser, & Marconi, 2017). We therefore reduced the number of caregivers interviewed at 18 months to…	thematic content analysis
Cain, C. L., Frazer, M., & Kilaberia, T. R. (2019). Identity work within attempts to transform healthcare: Invisible team processes. Human Relations, 72(2), 370-396.	Cain, Frazer and Kilaberia	2019	Identity work within attempts to transform healthcare: Invisible team processes	Human Relations	US	Using longitudinal qualitative analyses ……………….. Our approach uses longitudinal qualitative data	In this article, we ask: How do workers in a new healthcare team negotiate multiple identification targets, including their previous professional identities as well as their new team identities? What contextual events produce shifts in how workers identify? What do these shifts tell us about work identities, teams and organizational change?	workers in health-care teams	negotiating professional identities	negotiating; shifting; organizational change	The team studied here, called Whole Person (a pseudonym), was a new team, based in a large health system in the Midwestern United States. Because the team was new, team members grappled with how to work together, share their value with others in the healthcare system, and create team processes. We thus had an opportunity to focus on team formation and growth, and dis-cern the ways organizational …	no		other	not described (describes data collection method)	Bolger N, Davis A and Rafaeli E (2003) Diary methods: Capturing life as it is lived. Annual Review of Psychology 54(1): 579–616. Crozier SE and Cassell CM (2016) Methodological considerations in the use of audio diaries in work psychology: Adding to the qualitative toolkit. Journal of Occupational and Organizational Psychology 89(2): 396–419. Boyatzis RE (1998) Transforming Qualitative Informatio…	One	We extract these critical moments from workers’ weekly-recorded audio diaries. Our use of audio diaries is similar to biographical methods where respondents reflect on turning points in their life trajectory (Riessman, 2008; Thomson et al., 2002). Audio diaries include narratives of work experiences, infused with narratives of the self as workers engaged and negoti-ated the work (Sandelowski, 199…		7.5 months	unclear	To document identity work, we use individual audio diaries from healthcare workers as they formed a team. A total of 176 recordings spanning 30 weeks were transcribed and analyzed. …………. Care team members were asked to submit their observations on being part of the Whole Person team, work with patients and caregivers, and interactions with other professionals. These observations were collected th…	unclear 8-14	176 recordings	not named
Cameron, A., Johnson, E. K., Lloyd, L., Evans, S., Smith, R., Porteus, J., Darton, R., & Atkinson, T. (2019). Using longitudinal qualitative research to explore extra care housing. International Journal of Qualitative Studies on Health and Well-Being, 14(1), 1593038-1593038.	Cameron, Johnson, Lloyd, Evans, Smith, all, Porteus, Darton and Atkinson	2019	Using longitudinal qualitative research to explore extra care housing	International Journal Of Qualitative Studies On Health And Well-Being	UK	longitudinal qualitative research	Using a longitudinal qualitative research (LQR) approach, the aim of The Provision of Social Care in Extra Care Housing (ECHO) project was to investigate how care is negotiated and delivered in ECH. Focusing on the “extra care” element of extra care housing services, the ECHO project explored the perspectivesof residents on their changing care needs and their experiences of being cared for.	with residents, managers, care staff and local commis-sioners of housing and care	experience of receiving care	changing care needs; negotiated	We recruited four ECH schemes to take part in the study,one of which provided specialist support to peopleliving with dementia. These schemes were based intwo areas: a unitary authority (Area 1), and a countycouncil, two-tier authority (Area 2).	no	not described	other	not described (describes data collection method)	Neale, B., & Flowerdew, J. (2003). Time, texture and childhood: The contours of longitudinal qualitative research. International Journal of Social Research Methodology, 6(3), 189–199. Corden, A., & Millar, J. (2007a). Qualitative longitudinal research for social policy: Introduction to themed section. Social Policy & Society, 6, 529–532. Thomson, R. (2007). The qualitative longitudinal case histo…	Several	Individual interviews. Analysis of documents and unstructured observations. The analysis of documents,such as annual reports, provided valuable contextualinformation about organizational priorities and values.The observational data helped shape questions asked inthe interviews with residents, for example in relation to opportunities to take part in social activities. This paperreports data gather…		20 months	4	Residents were interviewed on four occasions over 20 months.	51	164 interviews	Our approachcombined longitudinal and thematic approaches
Campbell, V., & Nolan, M. (2019). 'It definitely made a difference': A grounded theory study of yoga for pregnancy and women's self-efficacy for labour. Midwifery, 68, 74-83.	Campbell and Nolan	2019	It definitely made a difference': A grounded theory study of yoga for pregnancy and women's self-efficacy for labour	Midwifery	UK	Design: A longitudinal grounded theory study. (abstract)	The aim was to generate a theory, grounded in women’s voices, about which aspects of Yoga for Pregnancy (YfP) are effective in enhancing women’s ability to manage labour.	pregnant woman	experiences of yoga for pregancy	none	In order to ensure a degree of homogeneity in the women’s YfP experience, the research was restricted to classes run by YfP teachers trained by NCT (formerly known as the National Child-birth Trust). NCT YfP classes are run by teachers working on a self-employed basis but within NCT operational and curriculum guide-lines. NCT is the largest provider of antenatal teacher training and private anten…	yes	This paper arises from a study which explored women’s experi-ences of Yoga for Pregnancy before analysing them through a self-efficacy lens. Previous papers,(Campbell,2018;CampbellandNolan,2016) have reported on aspects of Yoga for Pregnancy teachers’ language and actions in classes which appear to impact on women’s self-efficacy behaviour.	Grounded theory		Birks, M. , Mills, J. , 2011. Grounded Theory: A Practical Guide. SAGE, London . Hall, H.G. , McKenna, L.G. , Griffiths, D.L. , 2012. Applying grounded theory to midwifery research problems. Int. J. Childbirth 2, 136–141 . Charmaz, K. , 2003. Grounded theory, Strategies of Qualitative Inquiry. SAGE Publications, Inc, Thousand Oaks, CA . Lincoln, Y.S., Denzin, N.K., 2003. Turning points in qualita…	One	Individual interviews		differed, at longest 7.5 months	3	Interviews were conducted at three timepoints. The first interviews were undertaken before the women started YfP, the second near their babies’ due date, and the third postnatally.	22	45 interviews	refers to grounded theory sources
Carduff, E., Kendall, M., & Murray, S. A. (2018). Living and dying with metastatic bowel cancer: Serial in-depth interviews with patients. European Journal of Cancer Care, 27(1).	Carduff, Kendall and Murray	2018	Living and dying with metastatic bowel cancer: Serial in-depth interviews with patients	European Journal Of Cancer Care	UK	Serial in- depth interviews with patients (titel) ………. The interviews were analysed, using a narrative approach, longitudinally as case studies and then together (abstract) …………. This paper reports the longitudinal experiences, perceptions and service use of patients with metastatic colorectal cancer. (background)	This paper reports the longitudinal experiences, perceptions and service use of patients with metastatic colorectal cancer.	patients with metastatic colorectal cancer	longitudinal experiences, perceptions and service use	longitudinal experiences	Participants were purposively recruited from the outpatient clinic of a national centre for oncology in Scotland	no		Narrative research	constructionist and narrative philosophies (Crotty, 1998; Elliott, 2005; Frank, 1995).	Crotty, M. (1998). The foundations of social research: Meaning, and perspective in the research process. London: Sage. Elliott, J. (2005). Using narrative in social research: Qualitative and quantitative approaches, Thousand Oaks, CA: Sage. Frank, A. (1995). The wounded storyteller: Body illness and ethics. Chicago and London: The University of Chicago Press. Murray, S. A., Kendall, M., Carduff, …	One	Individual interviews	no	12 months	3 (up to)	Participants were interviewed over a year; each participating in up to three interviews.	16, The patient sample comprised of 10 men and 6 women	A total of 36 interviews were conducted (including 14 where the carer was present at the patent’s request)—16, 13 and 7 at interview points one, two and three respectively	Brown and Gilligan’s Voice Centred Relational Method (VCRM) (Brown & Gilligan, 1992; Mauthner & Doucet, 1998)
Carusone, S. C., O'Leary, B., McWatt, S., Stewart, A., Craig, S., & Brennan, D. J. (2017). The lived experience of the hospital discharge "Plan": A longitudinal qualitative study of complex patients. Journal of Hospital Medicine, 12(1), 5-10.	Carusone, O'Leary, McWatt, Stewart, Craig and Brennan	2017	The Lived Experience of the Hospital Discharge "Plan": A Longitudinal Qualitative Study of Complex Patients	Journal Of Hospital Medicine	Canada	A Longitudinal Qualitative Study (title)	A longitudinal case study approach was used, with multiple sources of data, to understand the clinical context and discharge plans in relation to the lived experience of patients over time, exploring potential misalignment and areas for improvement.	complex patients	the clinical context and discharge plans in relation to the lived experience of patients over time, exploring potential misalignment and areas for improvement.	lived experience of patients over time	conducted at Casey House, a 13-bed subacute care hospital in Toronto, Canada that provides in-patient and community programs to a complex patient group. All patients are HIV-positive. Inpatient hospital care is provided by an interdisciplinary team, including physicians, social workers, nurses, and healthcare aides.			Case study	longitudinal case study approach We used a multi-case study approach to explore the discharge process and post-discharge period. A case was defined as the discharge and transition of a patient from hospital to community.	19. Murray SA, Kendall M, Carduff E, et al. Use of serial qualitative interviews to understand patients’ evolving experiences and needs. BMJ. 2009;339:b3702. 20. Pope C, Ziebland S, Mays N. Qualitative research in health care. Analysing qualitative data. BMJ. 2000;320:114-116. 21. Dixon-Woods M. Using framework-based synthesis for conducting reviews of qualitative studies. BMC Med. 2011;9:39. 22.…	Several	Data were collected through serial interviews with patients (n = 4), medical chart abstraction, and review of discharge summaries.		1 month (ca)	4	4 time points: before the discharge meeting (I1); after the discharge meeting but before discharge (I2); within a week of discharge (I3); and approximately 30 days after discharge (I4).	9	Data are presented here for 9 cases, including 32 interviews, between October 2013 and June 2014. Interviews 1 (I1) and 2 (I2) were combined for 3 participants. Two participants were lost to follow-up for interview 4.	framework analysis approach
Castro, A., & Andrews, G. (2018). Nursing lives in the blogosphere: A thematic analysis of anonymous online nursing narratives. Journal of Advanced Nursing, 74(2), 329-338.	Castro and Andrews	2018	Nursing lives in the blogosphere: A thematic analysis of anonymous online nursing narratives	Journal of Advanced Nursing	Canada	Blogs offer substantive volumes of immediately accessible, longitudinally transcribed data (background)	The purpose of this study was to explore the work-life narratives of nurses through a thematic analysis of the nursing accounts they post in their public blogs. The overall research question was, “when nurses who work in traditional healthcare settings have the protection of online anonymity, how do they describe their nursing insights and experiences on blog platforms?”	nurses	describe their nursing insights	none	Using first Google and then Yahoo search engines, we searched for lists of nursing blogs recommended by at least two established groups representing nurses’ interests. The search engine key words used were “top nursing blogs,”“nursing magazine favourite blogs”, “nursing blogs 2015,”“‘nursing magazine’ AND ‘blog’,” and “best blogs for nurses.”			other	The research design was qualitative description.	Sandelowski, M. (2000). Focus on research methods: Whatever happened to qualitative description? Research in Nursing and Health, 23, 334– 340. https://doi.org/10.1002/1098-240X(200008)23:4<334:AIDNUR9>3.0.CO;2-G Li, D., & Walejko, G. (2008). Splogs and abandoned blogs: The Perils of sampling bloggers and their blogs. Information, Community and Society, 11, 279–296. https://doi.org/10.1080/1369118…	One	blog texts	no	12 months	differ between the 4 participants. 17 (longer entries); 187 (shorter entries); 26 (longer entries); 290 (shorter entries)	For each website, every entry from January 2014–December 2014 was copied into a document. ……………. All 520 blog posts between 1 January 2014–31 December 2014 were thematically analysed. Using a set time-period, we could compare nurses’ experiences in the same timeline.	4 bloggers and undefined numbers of comments	520 blog posts	thematic analysis
Cherry, M. G., Salmon, P., Byrne, A., Ullmer, H., Abbey, G., & Fisher, P. L. (2019). Qualitative evaluation of cancer survivors' experiences of metacognitive therapy: A new perspective on psychotherapy in cancer care. Frontiers in Psychology, 10, 949-949.	Cherry, Salmon, Byrne, Ullmer, Abbey and Fisher	2019	Qualitative Evaluation of Cancer Survivors' Experiences of Metacognitive Therapy: A New Perspective on Psychotherapy in Cancer Care	Frontiers In Psychology	UK	In a longitudinal qualitative study nested in an open trial	In this study, we report the findings of qualitative research nested in an open trial of MCT for anxiety and depression in adult cancer survivors. We also interviewed consenting patients a teach time point, to explore qualitatively: (i) how they understood and experienced the intervention; (ii) once treatment ended, how,and to what extent over the follow-up period, did patients transfer what they…	adult cancer survivors with depression or anxiety	experience and use of metacognitive therapy (MCT)	not so specific, mentions that they asked "at each time point"	Participants were patients referred to an adult clinical psycho-oncology service in the north of England, who (i) had initiatedMCT in the context of open trial of MCT for anxiety anddepression	yes	In alongitudinal qualitative study nested in an open trial of metacognitive therapy (MCT) for cancer survivors, weexplored how patients understood, experienced and applied MCT. In this trial,patients received six 1-h sessions of MCT, delivered weekly.Patients completed measures of emotional distress, quality of life,worry/rumination, fear of cancer recurrence and metacognitivebeliefs post-interve…	other	not described (describes data collection method)	Salmon, P., and Young, B. (2018). Qualitative methods can test and challenge what we think we know about clinical communication - if they are not too constrained by methodological ‘brands’. Patient Educ. Counsel. 101, 1515–1517. doi: 10.1016/j.pec.2018.07.005 Levitt, H. M., Motulsky, S. L., Wertz, F. J., Morrow, S. L., and Ponterotto, J. G. (2017). Recommendations for designing and reviewing qual…	One	Individual interviews		6 months	3	Of the 19 participants who completed treatment and could becategorized as improved or not, 17 agreed to be interviewedpost-treatment. Of these, 13 met the criterion for clinically-significant improvement. At 3- and 6-months follow-up, 14and 10 participants respectively, could be contacted andagreed to be interviewed. Of the seven participants who didnot complete MCT, two, who had attended one and…	19	43 interviews	constant comparison approach
Choi, J., Lingler, J. H., Donahoe, M. P., Happ, M. B., Hoffman, L. A., & Tate, J. A. (2018). Home discharge following critical illness: A qualitative analysis of family caregiver experience. Heart & Lung, 47(4), 401-407.	Choi, Lingler, Donahoe, Happ, Hoffman and Tate	2018	Home discharge following critical illness: A qualitative analysis of family caregiver experience	Heart & Lung	US	The purpose of this study was to longitudinally describe (aim) …………	The purpose of this study was to longitudinally describe the varying challenges and needs of family caregivers of ICU survivors related to patients’ home discharge.	family caregivers of ICU survivors	varying challenges and needs of family caregivers of ICU survivors related to patients’ home discharge	longitudinally describe the varying challenges and needs		yes	This descriptive qualitative study involved a content analysis of semi-structured interview data drawn from a parent study that longitudinally examined stress responses in family caregivers of adult ICU patients from patients’ ICU hospitalization to 4 months postICU discharge.26 Additional details of the parent study are available elsewhere.5,8–10,27,28	other	This descriptive qualitative study	29. Patton MQ. Qualitative Research and Evaluation Methods. 3rd ed. Thousand Oak, CA: SAGE Publications, Inc; 2001. 30. Guba EG. Criteria for Assessing the Trustworthiness of Naturalistic INquiries. Educ Commun Technol. 1981;29:75–91.	One	Individual interviews	no	4 months	3	For this secondary analysis, we included a subsample of interviews with family caregivers who experienced home discharge of patients during 4 months follow-up period. …………… In the parent study, family caregivers were recruited in the medical ICU of a tertiary university hospital in Western Pennsylvania and followed for 4 months after their respective patient was discharged from the ICU. All basel…	In this secondary analysis, we used data from 20 family caregivers (in total)	timepoint 1: 6 interviews, timepoint 2: 15 interviews, timepoint 3: 16 interviews	Content analysis
Chu, H., Westbrook, R. A., Njue-Marendes, S., Giordano, T. P., & Dang, B. N. (2019). The psychology of the wait time experience - what clinics can do to manage the waiting experience for patients: a longitudinal, qualitative study. BMC Health Services Research, 19(1), 459-459.	Chu, Westbrook, Njue-Marendes, Giordano and Dang.	2019	The psychology of the wait time experience - what clinics can do to manage the waiting experience for patients: a longitudinal, qualitative study	BMC Health Services Research	US	a longitudinal, qualitative study (titel)	Herein, we examine contextual factors and potential intervening variables that can shape the manner in which patients may respond to different waits. In addition, this study aims to identify actions providers and clinics can take to promote positive wait time experiences and mitigate negative ones.	People with HIV	waiting time	Some of the pre-visit interviews occurred in real-time as patients waited, providing a unique windowinto how patients feel, think and respond to differentcontextual factors as the wait unfolds	Research staff contacted patients new to the HIV pri-mary care clinics at the Michael E. DeBakey VeteransAffairs Medical Center (MEDVAMC) and Thomas StreetHealth Center (TSHC) in Houston, Texas. MEDVAMCis the VA’s 3rd largest HIV clinic, serving almost 1000Veterans each year. TSHC is an urban, community-based HIV clinic, serving over 6000 patients yearly.	yes	This was part of a larger study to understand how newpatients experience and evaluate their overall HIV care(NIH K23 MH100965) [24, 25].	other	not described (describes data collection method)	23. Willis GB. Cognitive interviewing: a tool for improving questionnaire design. Thousand Oaks: SAGE Publications; 2005. 26. Hsieh H, Shannon SE. Three approaches to qualitative content analysis. Qual Health Res. 2005;15(9):1277–88. 27. Grossoehme D, Lipstein E. Analyzing longitudinal qualitative data: the application of trajectory and recurrent cross-sectional approaches. BMC Res Notes. 2016;9:…	One	Individual interviews		6 to 12 months	3	The first interview occurred before the patient’s first visit with the HIV provider [T1]. The second occurred within 2 weeks after the first visit [T2]. The third occurred 6 to 12 months after the first visit [T3].	56	138 interviews	Content analysis (conventional and directed content analysi) Hsieh H, Shannon SE.
Ciclitira, K., Starr, F., Payne, N., Clarke, L., & Marzano, L. (2017). A sanctuary of tranquillity in a ruptured world: Evaluating long-term counselling at a women’s community health centre. Feminism & Psychology, 27(4), 530-552.	Ciclitira, Starr, Payne, Clarke and Marzano	2017	A sanctuary of tranquillity in a ruptured world: Evaluating long-term counselling at a women’s community health centre	Feminism & Psychology	UK	The longitudinal study described in this article	The main aim of this study was to explore how service users make sense of longterm counselling in a women-only service in the context of their gendered experiences and complex needs.	service users (women)	make sense of longterm counselling in a women-only service	longterm conselling	counselling services at a women’s community centre. This centre was established by women in 1986, in central London. The centre prioritises women who are marginalised and on low incomes; it provides low-cost counselling, a wide range of complementary and alternative medicine (CAM), travelling therapies, classes, groups, and has a cre` che. The centre’s stated mission is ‘‘to create an integrated …	yes	All 550 women who were provided counselling during 2003–2010 were sent a leaflet about the larger study, in which they were offered an interview pre- and postcounselling (for details of the larger study see: Ciclitira, Starr, Marzano, Brunswick, & Costa, 2012; Payne et al., 2015; Starr, Ciclitira, Brunswick, Costa, & Marzano, 2012).	other	This article describes a longitudinal study of the counselling services at a women’s community centre, using semi-structured interviews	Etherington, K. (2007). Ethical research in reflexive relationships. Qualitative Inquiry, 13, 599–616. Jefferson, G. (2004). Glossary of transcript symbols with an introduction. In G. H. Lerner (Ed.), Conversational analysis: Studies from the first generation (pp. 13–31). Amsterdam: John Benjamin. Braun, V., & Clarke, V. (2013). Successful qualitative research: A practical guide for beginners. Lo…	One	Individual interviews	no	unclear, before and after counseling but how long counsling is not described.	2	Thirty-three participants were interviewed pre-counselling only (following their clinical assessment and before they started their counselling), 19 were interviewed post-counselling only, and a further seven were interviewed both pre-counselling and post-counselling. Only seven participants were available to be interviewed both pre- and postcounselling. Due to the dropout rate, it was difficult t…	In total, 59 of these participants ranging from 23 to 67 years were interviewed between 2004 and 2011.	Probably 66 interviews	critical realist approach. Participants’ data were analysed thematically
Clarke, G., Fistein, E., Holland, A., Tobin, J., Barclay, S., & Barclay, S. (2018). Planning for an uncertain future in progressive neurological disease: a qualitative study of patient and family decision-making with a focus on eating and drinking. BMC Neurology, 18(1), 115-115.	Clarke, Fistein, Holl, Tobin, Barclay and Barclay.	2018	Planning for an uncertain future in progressive neurological disease: a qualitative study of patient and family decision-making with a focus on eating and drinking	BMC Neurology	UK	Longitudinal qualitative in-depth interviews (abstract) ………….. This longitudinal qualitative study (conclusion)	We therefore undertook a study of patients and their families with a range of progressive neurological diseases. We investigated their experiences and views on decision-making concerning their care as their disease progressed, with a focus on problems with eating and drinking. The key research question was: How do patients and their family members make decisions about their future care, with a pa…	patients and their families with a range of progressive neurological diseases	make decisions about their future care, with a particular focus on mealtimes, eating and drinking	make decisions about their future care	not described. Disease groups represented were Parkinson’s Disease (PD), Huntington’s Disease (HD), Motor Neurone Disease (MND), Progressive Supranuclear Palsy (PSP), Corticobasal Degeneration (CBD), Multiple Sclerosis (MS) and dementia (including both Alzheimer’s Disease and Frontotemporal Dementia). Data were collected in the participants home.		not stated, but data not analysed in this article is described. "Forty-two participants were interviewed between one to three times each between January 2015 and April 2017. This paper focuses on the findings from the interviews with patients and their relatives (N= 29)."	other	Longitudinal qualitative interviews were used	33. Braun V, Clarke V. Using thematic analysis in psychology. Qual Res Psychol. 2006;3(2):77–101. https://doi.org/10.1191/1478088706qp063oa.	Several	In the first instance, (Time one - T1) in-depth qualitative interviews lasting 20 to 90 min were conducted with each participant. The length of the interview was determined by each participant’s health and their responses to the questions. At a second optional ‘mealtime interview’ approximately one week later; the patient, relative and interviewer shared a meal in the participant’s home. Subseque…	no	3 to 12 months depending upon disease	3 (two interviews and a combination interview observation)	In the first instance, (Time one - T1) in-depth qualitative interviews lasting 20 to 90 min were conducted with each participant. The length of the interview was determined by each participant’s health and their responses to the questions. At a second optional ‘mealtime interview’ approximately one week later; the patient, relative and interviewer shared a meal in the participant’s home. Subseque…	29, Forty-two participants were interviewed between one to three times each between January 2015 and April 2017. This paper focuses on the findings from the interviews with patients and their relatives (N= 29).	not described.	Thematic analysis
Clermont, A., Kodish, S. R., Matar Seck, A., Salifou, A., Rosen, J., Grais, R. F., & Isanaka, S. (2018). Acceptability and utilization of three nutritional supplements during pregnancy: Findings from a longitudinal, mixed-methods study in Niger. Nutrients, 10(8).	Clermont, Kodish, Matar Seck, Salifou, Rosen, Grais and Isanaka	2018	Acceptability and Utilization of Three Nutritional Supplements during Pregnancy: Findings from a Longitudinal, Mixed-Methods Study in Niger	Nutrients	Niger	Findings from a Longitudinal, Mixed-Methods Study (titel)	The objective of this paper is to examine the factors influencing acceptability and utilization of these three supplements among a rural population in southern Niger using a longitudinal, mixed-methods design. In this paper, we discuss the typical consumption, perceived benefits, facilitating factors, and barriers to appropriate utilization reported by participants for each of the three supplemen…	pregnant woman, household and community member	factors influencing acceptability and utilization of these three supplements	over the course of pregnancy	The study took place in the Madarounfa Health District within Maradi region, a rural area in south-central Niger along the Nigerian border. Nutritional outcomes in the region are poor. According to the 2012 Demographic and Health Survey (DHS), 17.9% of women of reproductive age were underweight (body-mass index of <18.5 kg/m2) and 53.5% of children under five were stunted (<−2 z-score in height-f…	yes	This study was conducted within an ongoing randomized trial designed to assess the effectiveness of three prenatal supplements to improve infant immune response to rotavirus vaccination (ClinicalTrials.gov Identifier: NCT02145000) [24].	other	A mixed-methods sub-study to assess acceptability and utilization of the supplements included pregnant women, as well as household and community members, from 24 villages participating in the parent study. ………….. This was a two-phase, longitudinal study with emergent design, in which Phase 2 data collection built off findings from Phase 1. We collected quantitative and qualitative data to compare…	25. Palinkas, L.A.; Horwitz, S.M.; Green, C.A.; Wisdom, J.P.; Duan, N.; Hoagwood, K. Purposeful sampling for qualitative data collection and analysis in mixed method implementation research. Adm. Policy Ment. Health 2015, 42, 533–544. [CrossRef] [PubMed] 26. Fusch, P.; Ness, L. Are We There Yet? Data Saturation in Qualitative Research. Qual. Rep. 2015, 20, 1408–1416. 27. Arimond, M.; Zeilani, M.;…	Several	Semi-structured interview and focus group guides covered supplement acceptability, consumption practices, facilitating factors and barriers, perceived side effects, perceived benefits, support or opposition from household members (e.g., husbands and in-laws), and the supplement delivery mechanism. .............. Interviewers were also asked to give a numerical Likert scale rating of both acceptab…	yes	6 months	2	Data were collected in two different phases (July–August 2016 and November–December 2016) to allow for a longitudinal analysis that would capture changes in perspective as women progressed through their pregnancy and gained experience with the supplements. ................... In Phase 1, semi-structured individual interviews and focus groups were conducted with participating women at various gest…	pregnant women: n = 84 interviews and 17 focus groups; their husbands (n = 18 interviews) and mothers-in-law (n = 9 interviews), and study staff (midwives, n = 3 interviewers, and health assistants, n = 9 focus groups)	pregnant women: n = 84 interviews and 17 focus groups; their husbands (n = 18 interviews) and mothers-in-law (n = 9 interviews), and study staff (midwives, n = 3 interviewers, and health assistants, n = 9 focus groups) at time point two women were reinterviewed: (n = 39 interviews and 12 focus groups)	an inductive approach, drawing from aspects of Grounded Theory
Coombe, J., Harris, M. L., & Loxton, D. (2019). Motivators of contraceptive method change and implications for long-acting reversible contraception (non-)use: A qualitative free-text analysis. Sexual & Reproductive Healthcare, 19, 71-77.	Coombe, Harris and Loxton	2019	Motivators of contraceptive method change and implications for long-acting reversible contraception (non-)use: A qualitative free-text analysis	Sexual & Reproductive HealthCare	Australia	The CUPID Study is a longitudinal, population-based cohort study which recruited 3795 Australian women aged 18–23 into the baseline survey in 2012. (method section - decsription of parent study)	this analysis sought to develop a greater understanding of the motivators of method change over time for young Australian women using three waves of survey data from the Contraceptive Use, Pregnancy Intention and Decisions (CUPID) Study. Using responses to an open-ended question regarding reasons for contraceptive change, we were particularly interested in exploring what these comments could tell…	young australian women	motivators for change of contraceptive method	change over time / about long-acting reversible con-traception (LARC; IUDs, contraceptive implants, contraceptive injec-tions), (non-)use	not described	yes	The CUPID Study is a longitudinal, population-based cohort studywhich recruited 3795 Australian women aged 18–23 into the baselinesurvey in 2012. Participants were surveyed an additional two times,with data collection concluding in 2016. Survey invitations were sentroughly six months after previous survey completion.	other	not described	[8] Harris ML, Loxton D, Wigginton B, Lucke JC. Recruiting online: lessons from a longitudinal survey of contraception and pregnancy intentions of young Australian women. Am J Epidemiol 2015;181(10):737–46. https://doi.org/10.1093/aje/ kwv006. [14] Braun V, Clarke V. Using thematic analysis in psychology. Qual Res Psychol 2006;3(2):77–101. https://doi.org/10.1191/1478088706qp063oa. [15] Tavener M…	One	Secondary analysis of qualitative free-text comments from surveys		12 months (he baselinesurvey in 2012. Participants were surveyed an additional two times,with data collection concluding in 2016. Survey invitations were sentroughly six months after previous survey completion. )	3	All three CUPID surveys formed the sampling frame for this analysis. Participants were eligible for inclusion if they had completed all three surveys (n = 1224), with a response time between surveys of greater than 3 months and less than 1.5 years.	512	740 free-text comments	thematic analysis
Coombs, M. A., Parker, R., & de Vries, K. (2017). Managing risk during care transitions when approaching end of life: A qualitative study of patients’ and health care professionals’ decision making. Palliative Medicine, 31(7), 617-624.	Coombs, Parker and de Vries	2017	Managing risk during care transitions when approaching end of life: A qualitative study of patients’ and health care professionals’ decision making	Palliative Medicine	New Zealand	Design: Qualitative study using field observations and longitudinal semi-structured interviews. A longitudinal qualitative study	To describe decision-making processes that influence transitions in care when approaching the end of life.	Patients in palliative care (approaching end of life) and family members	describe decision-making processes that influence transitions in care when approaching the end of life	decision-making processes …. influence transitions in care	Field observations were undertaken in three sites: a residential care home, a medical assessment unit and a general medical unit in New Zealand.	no		other	A longitudinal qualitative study	19. Dewing J. Participatory research. A method for process consent with persons who have dementia. Dementia 2007; 6: 11–25. 20. Gold R. Roles in sociological field observation. Soc Forces 1958; 36: 217–223. 21. Thomas DR. A general inductive approach for analyzing qualitative evaluation data. Am J Eval 2006; 27: 237–246.	Several	field observation and interviews.	no	3–4 months	2	In each site, a 4-week period of fieldwork was undertaken involving field observation and face-to-face interviews. Two in-depth semi-structured interviews (at recruitment and 3–4 months later) were conducted with patients known to have advanced and progressive disease and likely to be in the last 12 months of life.	29 initial interviews	A total of 40 interviews were conducted: 29 initial interviews and 11 follow-up interviews	Thematic analysis was undertaken
Corepal, R., Best, P., O'Neill, R., Tully, M. A., Edwards, M., Jago, R., Miller, S.J., Kee, F., Hunter, R. F. (2018). Exploring the use of a gamified intervention for encouraging physical activity in adolescents: a qualitative longitudinal study in Northern Ireland. BMJ Open, 8(4), e019663-e019663.	Corepal, Best, O'Neill, Tully, Edwards, Jago, Miller, Kee and Hunter	2018	Exploring the use of a gamified intervention for encouraging physical activity in adolescents: a qualitative longitudinal study in Northern Ireland	BMJ Open	UK (northern Ireland)	a qualitative longitudinal study (title)	The aim of this study was to explore the views and experiences of adolescents who participated in a gamified PA intervention based on Self-determination Theory (SDT), and the temporal changes of these views and experiences over the 1-year study period. Study objectives included: 1. To explore key aspects of a gamified PA intervention over a 1-year period using a qualitative longitudinal research …	adolescents who participated in a gamified PA intervention	experiences of adolescents who participated in a gamified PA intervention	temporal changes of these views and experiences over the 1-year study period	School characteristics are shown in table 1: two were all-boys schools, two all-girls schools and one was a co-educational school. All intervention schools were single sex (boys (n=1) and girls (n=2)). Students (n=224) from year 9 classes (aged 12–14 years) were invited to participate in the trial.	yes	The StepSmart Challenge was a 24-week primarily schoolbased intervention utilising team and individual competitions in five schools in Belfast, Northern Ireland. The main results from the feasibility trial are published elsewhere (Best et al, under review). Briefly, the results demonstrated that the StepSmart Challenge was acceptable to young people for encouraging PA, and there was a trend in in…	other	Qualitative longitudinal research	21. Saldana J. Longitudinal qualitative research: analysing change through time. California: AltaMira Press, 2003. 22. Corden A, Millar J. Qualitative longitudinal research for social policy – introduction to themed section. Social Policy and Society 2007;6:529–32. 23. Calman L, Brunton L, Molassiotis A. Developing longitudinal qualitative designs: lessons learned and recommendations for health s…	One	Focus group interviews	no	12 months	4	a QLR design was used involving repeated semi-structured focus groups with the same participants over four data collection periods (recurrent cross-sectional approach). This enabled qualitative charting of the perceived behaviour change as well as changes in attitudes and opinions over a 1-year period. Data were collected 1 month preintervention (T0), at the end of the team competition (8 weeks) …	19	12 focus groupinterviews	Thematic Analysis Framework (Braun V, Clarke V. Using thematic analysis in psychology. Qual Res Psychol 2006;3:77–101.)
Côté-Arsenault, D., & Denney-Koelsch, E. (2018). “Love is a choice”: Couple responses to continuing pregnancy with a lethal fetal diagnosis. Illness, Crisis & Loss, 26(1), 5-22.	Côté-Arsenault and Denney-Koelsch	2018	“Love Is a Choice”: Couple Responses to Continuing Pregnancy With a Lethal Fetal Diagnosis	Illness, Crisis & Loss	US	This longitudinal, naturalistic study (abstract)	Hence, the purpose of this study is to describe pregnant couples’ responses and relationships during pregnancy and after birth when they choose to continue a pregnancy with an LFD (Lethal Fetal Diagnosis). A secondary goal is to examine similarities and differences in these responses within the couple.	pregnant couples’	responses and relationships during pregnancy and after birth when they choose to continue a pregnancy with an LFD (Lethal Fetal Diagnosis	during pregnancy	not described	yes	This analysis is part of a larger study that sought to understand the experience and needs of parents in continued pregnancy and its aftermath with an LFD (NR012733-01A1). Focused analyses from the larger study indicate that both parents experience altered developmental tasks of pregnancy in the circumstance of LFD (Coˆ te´ -Arsenault & Denney-Koelsch, 2016).	other	longitudinal naturalistic study	Miles, M. B., Huberman, A. M., & Saldan˜ a, J. (2014). Qualitative data analysis: A methods sourcebook (3rd ed.). Thousand Oaks, CA: Sage Publications, Inc.	Several	The first author interviewed parents together and then separately during pregnancy and after the baby’s birth. This approach allowed each parent to tell their joint and individual story and for individual voices to be heard.		unclear	differed between participants 1 to 5 interviews.	Unclear: Ninety interviews were conducted between 2012 and 2014; each parent participated in one to five interviews.	16 mothers, 13 fathers, and 1 lesbian spouse	Ninety interviews were conducted between 2012 and 2014; each parent participated in one to five interviews.	no stated method refers to Miles, Huberman, & Saldan˜ a, 2014
Cresswell, K. M., Mozaffar, H., Lee, L., Williams, R., & Sheikh, A. (2017). Safety risks associated with the lack of integration and interfacing of hospital health information technologies: A qualitative study of hospital electronic prescribing systems in England. BMJ Quality & Safety, 26(7), 530-541.	Cresswell, Mozaffar, Lee, Williams and Sheikh	2017	Safety risks associated with the lack of integration and interfacing of hospital health information technologies: a qualitative study of hospital electronic prescribing systems in England	BMJ Quality & Safety	UK	We collected longitudinal qualitative data from six hospitals (abstract) ……….. We conducted a longitudinal, qualitative, multisite case study investigating (methods)	As part of an English programme of research, we explored the social and technical challenges relating to integration and interfacing experienced by early adopter hospitals of standalone and hospital-wide multimodular integrated electronic prescribing (ePrescribing) systems. (abstract)	hospitals (We conducted 173 interviews with users, implementers and software suppliers (at up to three different times), 24 observations of system use and strategic meetings, 17 documents relating to implementation plans, and 2 whole-day expert round-table discussions. )	social and technical challenges relating to integration and interfacing experienced (…) electronic prescribing (ePrescribing) systems	integration	hospitals We purposively sampled a variety of hospital case study sites implementing two different types of ePrescribing systems26: (1) four sites with multimodular ePrescribing systems supplied by one vendor as part of a hospital-wide EHR (ie, providing functionality surrounding ePrescribing, stock control, data analysis and combination with patient notes); and (2) two sites that were coupling e…	yes	This work is part of an evaluation of ePrescribing systems in English hospitals commissioned by the National Institute for Health Research.4	Case study	longitudinal, qualitative, multisite case study	25 Crowe C, Cresswell K, Robertson R, et al. The case study approach. BMC Res Methodol 2011;11:100. 26 Coyne IT. Sampling in qualitative research. Purposeful and theoretical sampling; merging or clear boundaries? J Adv Nurs 1997;26:623–30. 27 Guion LA, Diehl DC, McDonald D. Triangulation: establishing the validity of qualitative studies. University of Florida: IFAS Extension, 2011. 28 Saldaña J. …	Several	We used a combination of semistructured interviews, documentary data, observations and expert roundtable discussions		Differing between the 6 data collection sites (hospitals), One hospital was folloed three years, two followed two years, one one year and two shorter and not stated). Not described that the same people was repeatedly interviewed.	3	We conducted interviews at up to three time points tailored to implementation progress. In organisations that had already implemented a relevant system at the time of recruitment, we conducted two rounds of interviews. This longitudinal design allowed us to investigate expectations, changes over time and varying perceptions as systems were increasingly embedded within organisational functioning.28	unclear	We conducted 173 interviews with users, implementers and software suppliers (at up to three different times), 24 observations of system use and strategic meetings, 17 documents relating to implementation plans, and 2 whole-day expert round-table discussions.	thematically analysed
Curry, L. A., Brault, M. A., Linnander, E. L., McNatt, Z., Brewster, A. L., Cherlin, E., Peterson Flieger, S., Ting, H. H. & Bradley, E. H. (2018). Influencing organisational culture to improve hospital performance in care of patients with acute myocardial infarction: A mixed-methods intervention study. BMJ Quality & Safety, 27(3), 207-217.	Curry, Brault, Linn, McNatt, Brewster, Cherlin, Flieger Ting and Bradley	2018	Influencing organisational culture to improve hospital performance in care of patients with acute myocardial infarction: a mixed-methods intervention study	BMJ Quality & Safety	US	through a longitudinal design in a diverse sample of hospitals, the use of robust quantitative and qualitative measures of culture, and the inclusion of an important clinical outcome. (background)	We designed a 2-year intervention, Leadership Saves Lives (LSL), directed at fostering changes in hospital organisational culture that might contribute to reductions in RSMRs (risk-standardised mortality rates) for patients with AMI (acute myocardial infarction ). Our study addresses limitations of prior research through a longitudinal design in a diverse sample of hospitals, the use of robust qu…	10 hospitals, Each hospital appointed a guiding coalition of approximately 15 staff involved in care of patients with AMI, from multiple departments (eg, cardiology, emergency medicine, pharmacy, quality improvement) and levels of the organisation (eg, senior executives to front-line staff). Also different professions of health care providers.	fostering changes in hospital organisational culture	fostering changes in hospital organisational culture	hospital (unlearly described)	yes	We designed a 2-year intervention, Leadership Saves Lives (LSL),26 directed at fostering changes in hospital organisational culture that might contribute to reductions in RSMRs for patients with AMI. ……… The intervention, previously described in detail,26 was implemented from 25 June 2014 to 24 June 2016. LSL was designed to foster improvements in five domains of hospital organisational culture r…	other	This is a 2-year, mixed-methods interventional study	27 Creswell JW, Plano Clark VL. Designing and conducting mixed methods research. 2nd ed. Los Angeles: Sage Publications, 2011. 29 Malterud K. The art and science of clinical knowledge: evidence beyond measures and numbers. Lancet 2001;358:397–400. 30 Craig P, Dieppe P, Macintyre S, et al. Developing and evaluating complex interventions: the new Medical Research Council guidance. BMJ 2008;337:a165…	Several	We measured changes in three outcomes: domains of organisational culture, uptake of evidence-based strategies associated with lower RSMR, and RSMR for intervention hospitals and nationally. To quantify changes in organisational culture, we employed a web-based, validated 31-item survey. ........... qualitative: individual interviews ......... We conducted ethnographic observations39 at baseline (…	yes	18 months	3	we examined changes in hospital RSMRs between July 2011 and June 2014 (the period immediately preceding the intervention) and July 2012 and June 2015, the most contemporary data available. We also examined RSMRs from the July 2010 to June 2013 period to understand subsequent changes in the context of longer trends. ............ We collected qualitative in-person interviews32 data using in-depth, …	total of 197 individual respondents in interviews	We surveyed guiding coalition members at baseline (168 individuals), 12-month (186 individuals) and 24-month (178 individuals) waves. ………… We conducted ethnographic observations39 at baseline (n=40 hours) and 18-month (n=16 hours) visits using a standardised observation guide (online supplementary appendix D). ................ We conducted 393 in-depth interviews at baseline (n=162), 6 months (n=…	unclear refers to Patton MQ. Qualitative research & evaluation methods. Thousand Oaks, Calif: Sage Publications, 2002
Daker-White, G., Hays, R., Blakeman, T., Croke, S., Brown, B., Esmail, A., & Bower, P. (2018). Safety work and risk management as burdens of treatment in primary care: Insights from a focused ethnographic study of patients with multimorbidity. BMC Family Practice, 19, 155.	Daker-White, Hays, Blakeman, Croke, Brown, Esmail and Bower	2018	Safety work and risk management as burdens of treatment in primary care: insights from a focused ethnographic study of patients with multimorbidity	BMC Family Practice	UK	These objectives were addressed via a longitudinal, multi-method qualitative study in the form of a focused ethnography (methods)	The aims of the study were to describe the safety issues identified in a cohort of primary care patients with multimorbidity; and, to explore the clinical and social context in which patient safety concerns arise and play out. These objectives were addressed via a longitudinal, multi-method qualitative study in the form of a focused ethnography [44]. The principle aim of the analysis was to const…	primary care patients with multimorbidity, spouses, health-care providers	safety issues identified in a cohort of primary care patients with multimorbidity	in which patient safety concerns arise and play out	Primary care. Twenty-six patients were purposefully recruited following identification by participating GPs in Greater Manchester	yes	The study methods are detailed elsewhere [15].	Ethnography	longitudinal, multi-method qualitative study in the form of a focused ethnography …………… in analysis: For the case study [48] analysis	48. Baxter P, Jack S. Qualitative case study methodology: study design and implementation for novice researchers. Qual Rep. 2008;13(4):544–59. 49. Patton MQ. Qualitative research. Thousand Oaks: Wiley; 2005.	Several	enrolled for 24 months. Attempts were made to interview patients face-to-face every 12 months and after primary care consultations. On occasion, informal carers were also present at these interviews or were interviewed separately. Patient’s GPs and/or practice nurses were interviewed at year 1 and year 2. We aimed to observe at least two primary care consultations each year with each participant.…	yes	24 months	individually in the different cases. Planned at least 3 interviews and observations.	enrolled for 24 months. Attempts were made to interview patients face-to-face every 12 months and after primary care consultations. On occasion, informal carers were also present at these interviews or were interviewed separately. Patient’s GPs and/or practice nurses were interviewed at year 1 and year 2. We aimed to observe at least two primary care consultations each year with each participant.…	For the six cases identified, we analysed all of the data collected for each individual, i.e. EHRs, paper prescriptions (where available), transcripts and field notes from participant interviews and observations of clinical consultations. All data were anonymised at, or immediately following data collection and all participant identifiers are pseudonyms. (26 total in parent study)	unclear	not described
Dambha-Miller, H., Silarova, B., Irving, G., Kinmonth, A. L., & Griffin, S. J. (2018). Patients' views on interactions with practitioners for type 2 diabetes: A longitudinal qualitative study in primary care over 10 years. The British Journal Of General Practice, 68(666), e36-e43.	Dambha-Miller, Silarova, Irving, Kinmonth and Griffin	2018	Patients' views on interactions with practitioners for type 2 diabetes: a longitudinal qualitative study in primary care over 10 years	The British Journal Of General Practice	UK	a longitudinal qualitative study (titel)	This study aims to explore patient views on factors within patient–practitioner interactions that are of significance to them after diagnosis, and over a 10-year experience of living with the disease.	patients with diabetes type 2	views on factors within patient–practitioner interactions that are of significance to them	after diagnosis, and over a 10-year experience	primary care	yes	The present study is based on the data collected within the existing ADDITIONCambridge and ADDITION-Plus trials between 2002 and 2016. A detailed description of the study designs and rationale has been previously reported.27,28 In short, ADDITION-Cambridge was a cluster randomised controlled trial in which patients were screened for type 2 diabetes followed by either routine care (control group) …	other	a longitudinal qualitative study	31. Braun V, Clarke V. Using thematic analysis in psychology. Qual Res Psychol 2006; 3(2): 77–101. 32. Sandelowski M. Whatever happened to qualitative description? Res Nurs Health 2000; 23(4): 334–340. 33. Neergaard MA, Olesen F, Andersen RS, Sondergaard J. Qualitative description — the poor cousin of health research? BMC Med Res Methodol 2009; 9: 52. 34. Lincoln YS, Guba EG. But is it rigorous? …	One	A single open-ended question at the end of the CARE measure asks: ‘If you would like to add further comments, please do so here.’		10 months	2	Out of 1106 participants who completed the CARE questionnaire at 1-year follow-up, 311 included a comment (28% of questionnaire respondents), 101 of 380 participants who completed the questionnaire at 10-year follow-up also provided a comment (27% of questionnaire respondents), and 46 of the same participants responded at both time points.	46 at 2 time points, 311 at time point 1	Out of 1106 participants who completed the CARE questionnaire at 1-year follow-up, 311 included a comment (28% of questionnaire respondents), 101 of 380 participants who completed the questionnaire at 10-year follow-up also provided a comment (27% of questionnaire respondents), and 46 of the same participants responded at both time points.	not described
Dang, B. N., Westbrook, R. A., Njue, S. M., & Giordano, T. P. (2017). Building trust and rapport early in the new doctor-patient relationship: A longitudinal qualitative study. BMC Medical Education, 17(1), 32-32.	Dang, Westbrook, Njue and Giordano	2017	Building trust and rapport early in the new doctor-patient relationship: a longitudinal qualitative study	BMC Medical Education	US	a longitudinal qualitative study	this study aims to identify what patients see as the most critical elements for building trust and rapport from the outset.	patients (people with HIV)	critical elements for building trust	building trust	the HIV clinic at the Michael E. DeBakey Veterans Affairs (VA) Medical Center in Houston, Texas. This clinic is the third largest HIV clinic within the Department of Veterans Affairs, caring for almost 1,000 patients yearly. Patients were new to the HIV clinic at the DeBakey VA, but were not necessarily newly diagnosed	yes	This study took place within the context of a larger qualitative study seeking to understand how patients anticipate, experience and evaluate their HIV care.	other	longitudinal qualitative study	16. Willis GB. Cognitive interviewing: A tool for improving questionnaire design. Thousand Oaks: Sage Publications; 2005. 17. Guest G, Bunce A, Johnson L. How many interviews are enough? An experiment with data saturation and variability. Field Methods. 2006;18(1): 59–82. 18. Hsieh HF, Shannon SE. Three approaches to qualitative content analysis. Qual Health Res. 2005;15(9):1277–88. 19. Grossoehm…	One	Individual interviews. The first interview focused on the patient’s past experiences with clinical care and the patient’s ideals, hopes, and expectations of the HIV provider. The second interview gathered the patient’sfirst impression of the HIV provider. The third interview examined how the patient’s evaluation of the HIV provider evolved over time, presumably after having had repeated visits wi…		6 to 12 months	3	We interviewed patients at three time points: once before their first HIV provider visit, a second time within two weeks after the first visit, and a third time between 6 and 12 months after the first HIV provider visit.	21	Twenty one patients completed the pre-visit interview, 20 completed the initial post-visit interview and 16 completed the third interview at 6–12 months after the first HIV provider visit. We conducted 61 h of patient interviews.	content analysis
Danneris, S. (2018). Ready to work (yet)? Unemployment trajectories among vulnerable welfare recipients. Qualitative Social Work, 17(3), 355-372.	Danneris	2018	Ready to work (yet)? Unemployment trajectories among vulnerable welfare recipients	Qualitative Social Work	Denmark	a qualitative longitudinal study (abstract)	A central aim of the article is to introduce the client perspective as a way of increasing and supplementing our knowledge about policy delivery in terms of understanding not only what services and benefits clients receive but also how they are received and the consequences of receiving them (Borghi and Van Berkel, 2007; Larsen, 2013). Investigating the fabric and textures of the perceived policy…	vulnerable welfare recipients	understanding not only what services and benefits clients receive but also how they are received and the consequences of receiving them	perceived policy implications and their longitudinal interrelations	welfare system, social services - Of the 25 clients, 12 are men and all 25 are in the age range from 30 to 59 years old. They live in different parts of Denmark, in both cities and small towns and in places ranging from their own house, rentals and caravans to a friend’s living room floor. Only four of the clients live with their spouse, while the rest live alone or as single parents. The clients…	no		other	qualitative longitudinal study	Grinyer A and Thomas C (2012) The value of interviewing on multiple occasions or longitudinally. In: Gubrium JF, Holstein JA, McKinney K, et al. (eds) The Sage Handbook of Interview Research: The Complexity of the Craft, (2nd ed). Thousand Oaks, CA: SAGE Publications, pp. 219–230 Kvale S and Brinkmann S (2015) Interview: Det kvalitative forskningsinterview som ha˚ndværk. Copenhagen: Hans Reitzel.…	Several	hourlong individual interviews and observations of meetings with social work professionals, as well as phone interviews and several informal conversations – the focus being on what had happened since the last contact, the circumstances around the current situation and thoughts about the future.	no	24 months	4 to 5 depended upon participant.	The data were collected in four to five irregular empirical waves, determined by the changes and transitions in the clients’ lives, in the course of a two-year period.	25 were followed over time (36 intervied at base-line)	over 2000 pages of transcribed observations, interviews and field notes	Detailed argument and description but no stated type of method
Dattalo, M., Wise, M., Ford Li, J. H., Abramson, B., & Mahoney, J. (2017). Essential resources for implementation and sustainability of evidence-based health promotion programs: A mixed methods multi-site case study. Journal of Community Health, 42(2), 358-368.	Dattalo,Wise, Ford, Abramson and Mahoney	2017	Essential Resources for Implementation and Sustainability of Evidence-Based Health Promotion Programs: A Mixed Methods Multi-Site Case Study	Journal of Community Health	US	This qualitative study analyzes the longitudinal experiences	This study examines the varying abilities of intervention sites from the randomized trial to implement and sustain SO (Stepping On is a falls prevention program) and CDSMP (Chronic Disease Self-Management Program) workshop delivery over 3 years and compares different approaches to preparing for workshop implementation by level of sustainability.	interventions cites? We used a multi-site case study design, defining each intervention county as a case. Interviews with: coaches during year 1 (n = 3) and county change leaders year 2 and 3	implement and sustain SO (Stepping On is a falls prevention program) and CDSMP (Chronic Disease Self-Management Program) workshop delivery over 3 years	implement and sustain … over 3 years	rural Wisconsin communities ………. ixteen county Aging Units in rural Wisconsin counties participated in the BHAS study from August 2012—July 2014. County Aging Units are state governmental or non-profit entities (county or tribal) that develop and coordinate systems to deliver social and other needed services to older adults	yes	This qualitative study was nested within the intervention group of the Bringing Healthy Aging to Scale (BHAS) wait-list randomized trial. BHAS was designed to test the effectiveness of coaching rural community leaders to use a process improvement approach to implement SO and CDSMP workshops [15]. SO and CDSMP are communitybased workshops, facilitated by trained leaders through weekly sessions (6 …	Case study	A Mixed Methods Multi-Site Case Study	17. Creswell, J. W. (2013). Qualitative inquiry and research design: Choosing among five approaches (3 edn.). Thousand Oaks: Sage. 21. Hsieh, H. F., & Shannon, S. E. (2005). Three approaches to qualitative content analysis. Qualitative health research, 15(9), 1277– 1288. doi:10.1177/1049732305276687.	Several	We analyzed 57 sources of data from eight sites, ranging from two to ten data sources per site. The primary data sources were semi-structured telephone interviews with coaches during year 1 (n = 3) and county change leaders during years 1 and 2 (n = 12). ........... The interviews were supplemented by annual county reports submitted to the study team at the end of year 1 (n = 7) and open-ended su…		36 months (3 yrs) not stated exactly	unclear	This qualitative study analyzes the longitudinal experiences of the first eight counties in the intervention group, during both the intervention year (year 1) and two postintervention years (years 2 and 3) in the context of the number of total target workshops each county delivered over the course of 3 years (8/2013–7/2015). ............. The year 1 interviews occurred 8–12 months after the inter…	at least 9, but unclear	Year one: BHAS coach interviewc (n): 3; Change leader interview (n): 6, Sustainability surveys (n): 13, County report to study team (n): 7, Year 2 qualitative data sources: Change leader interview (n): 6; Sustainability surveys (n) 9,	conventional content analysis
Davies, K. E., Marshall, J., Brown, L. J. E., & Goldbart, J. (2017). Co-working: Parents’ conception of roles in supporting their children’s speech and language development. Child Language Teaching & Therapy, 33(2), 171-185.	Davies, Marshall, Brown and Goldbart	2017	Co-working: Parents’ conception of roles in supporting their children’s speech and language development	Child Language Teaching & Therapy	UK	longitudinal study (abstract), a qualitative study using a cross-sectional and longitudinal design,	The current study aimed to identify parents’ conception of roles and to track changes in conception as they participated in typical speech and language therapy intervention provided by services in the UK. The study posed the following research questions: 1. What are parents’ conceptions of their own and SLTs’ roles in speech and language therapy intervention for their pre-school children? 2. How …	parents’	conception of roles and to track changes in conception as they participated in typical speech and language therapy intervention	track changes in conception	Speech and language therapy managers from four NHS sites in England	yes	This article reports part of a larger investigation of both parent and SLT conceptions of their own and each other’s roles. It presents the findings of a qualitative study using a cross-sectional and longitudinal design, to collect data from participants during typical management by SLTs in the UK.	other	It presents the findings of a qualitative study using a cross-sectional and longitudinal design		One	Individual interviews. All participants were interviewed initially using a semi-structured format, with open-ended questions that allowed parents to give their opinions in detail, explaining and elaborating as the interview progressed.	no	7,5 months (30 weeks)	3	Three interviews with each parent were planned over a 30-week period whilst they received typical care according to the model agreed by the service. This could be direct therapy with the SLT, usually in weekly appointments over 4-6 weeks, parent groups, sample sessions modelling intervention, written programmes, review or discharge. .......... Parents were invited by the researcher to participate…	14 one time interviews, 8 parents were followed over time. Twenty parents were invited to participate and 14 were recruited to the study. Two mother and father pairs were interviewed together and analysed as one set of views as, in both instances, the father answered the questions. A smaller subset of 8 parents participated in the longitudinal study.	1st interviews 14, 2nd interviews 8, 3rd interviews 5	Thematic Network Analysis …. Framework Analysis
Davies, S., Salmon, P., & Young, B. (2017). When trust is threatened: Qualitative study of parents' perspectives on problematic clinical relationships in child cancer care. Psycho-Oncology, 26(9), 1301-1306.	Davies, Salmon and Young	2017	When trust is threatened: Qualitative study of parents' perspectives on problematic clinical relationships in child cancer care	Psycho-Oncology	UK	Multicentre longitudinal qualitative study	So we took an inductive approach, analysing qualitative interviews with parents who described pervasive difficulties in their relationships with clinicians to understand their needs and identify ways of helping them.	parents who described pervasive difficulties in their relationships with clinicians in childhood cancer	understand their needs and identify ways of helping	none	in childhood cancer ….	yes	The data came from the RAPPORT study, a longitudinal qualitative study examining parents' relationships with the clinicians treating their children for acute lymphoblastic leukaemia.9,10	other	longitudinal qualitative study		One	Individual interviews. phase 1, approximately 37 weeks postdiagnosis; phase 2, 6 months; and phase 3, 12 months postdiagnosis. At each phase, one routine clinic consultation with the child's lead medical clinician was audio‐recorded and a researcher subsequently interviewed parents. Given our focus on exploring problems from the perspective of parents, analyses here draw only on the interviews.	no	12 months	3	"We collected data at three time points corresponding to ‘early’ (B6–8 weeks), ‘interim’ (B6 months) and ‘late’ (B12 months) postdiagnostic phases. " phase 1, approximately 37 weeks postdiagnosis; phase 2, 6 months; and phase 3, 12 months postdiagnosis. ……… (this does not make sense since 37 weeks is about 9 months. It should probaly say 3-7 weeks.)	20	We analysed 50 interviews with 20 parents.	Integrative qualitative communication analysis
Davis, E. B., Kimball, C. N., Aten, J. D., Andrews, B., Van Tongeren, D. R., Hook, J. N., Davis, D. E., Granqvist, P., & Park, C. L. (2019). Religious meaning making and attachment in a disaster context: A longitudinal qualitative study of flood survivors. Journal of Positive Psychology, 14(5), 659-671.	Davis, Kimball, Aten, Andrews, Van Tongeren, Hook, Davis, Granqvist and Park	2019	Religious meaning making and attachment in a disaster context: A longitudinal qualitative study of flood survivors	Journal of Positive Psychology	US	A Longitudinal Qualitative Study (titel)	In the current study, we develop a grounded theory of how people draw on their religion and their religious attachment (perceived relationship with God) to make meaning of their disaster experiences. More specifically, we employed a longitudinal qualitative design to examine how postdisaster religious meaning making and attachment unfold over time and to compare these processes in the acute and i…	disaster survivors	draw on their religion and their religiousattachment (perceived relationship with God) to makemeaning of their disaster experiences	unfold over time and to compare theseprocesses in the acute and intermediate wake of adisaster (e.g. at 4 weeks [Time 1, T1] and 6 monthspostdisaster [Time 2, T2] (3) Does this religious meaning making processdiffer across disaster phases?	We examined these research questions with a sample ofsurvivors of the 2016 Louisianaflood, because (a) thatflood was the most devastating natural disaster to hitthe U.S. since Superstorm Sandy in 2012 (Yan & Flores,2016), (b) the population of Louisiana is one of the mosthighly religious in the U.S. (Lipka & Wormald,2016), and(c) religious individuals are particularly likely to engagein religious…	no	Beskrivs inte i texten men flera artiklar av författarna om ämnet ingår i scopingreview.	Grounded theory		Creswell,J.(2014). Research design: Qualitative, quantitative, and mixed methods approaches (4th ed.). Thousand Oaks, CA: Sage. Corbin, J., & Strauss, A. (2015). Basics of qualitative research: Techniques and procedures for developing grounded theory. Thousand Oaks, CA: Sage. Granqvist, P., & Main, M. (2017). The Religious Attachment Interview (RAI). Unpublished manuscript. Uppsala, Sweden: Uppsa…	Several	Individual interviews. At T1 and T2, participants completed semi-structured,individual qualitative interviews using a disaster-adapted version of the Religious Attachment Interview(RAI; Granqvist & Main,2017), which itself is an adapta-tion of the Adult Attachment Interview (AAI; George,Kaplan, & Main,1996). The disaster-adapted RAI (RAI-D;see Figure S1). consists of 22 open questions, most ofwhi…		6 months	2	All 36 participants completed the RAI-D at T1 (4 weeks post-disaster), and 29 of them (19% attrition) completed it atT2 (6 months postdisaster).	36	65 interviews	grounded theory
Davis, E. B., Kimball, C. N., Aten, J. D., Hamilton, C., Andrews, B., Lemke, A., Hook, J. R., Captari, L., Granqvist, P., Hook, J. N., Davis, D. E., Van Tongeren, D. R., Cattrell, E. L., Cuthbert, A. D., Chung, J. (2019). Faith in the wake of disaster: A longitudinal qualitative study of religious attachment following a catastrophic flood. Psychological Trauma: Theory, Research, Practice & Policy…	Davis, Kimball, Aten, Hamilton, Andrews, Lemke, Hook, Captari, Granqvist, Hook, Davis, Van Tongeren, Cattrell, Cuthbert and Chung	2019	Faith in the Wake of Disaster: A Longitudinal Qualitative Study of Religious Attachment Following a Catastrophic Flood	Psychological Trauma: Theory, Research, Practice & Policy	US	A Longitudinal Qualitative Study (titel)	we anticipated this natural disaster would have some type of effect on survivors’religious attachment (i.e., perceived relationship with God). We chose a longitudinal design in order to permit an examination of these effects over time and a comparison of such effects in the acute versus intermediate wake of the disaster. Research Question 1: In the wake of a disaster, what types of religious-atta…	disaster survivors	religious attachment	Wechose a longitudinal design in order to permit an examination ofthese effects over time and a comparison of such effects in theacute versus intermediate wake of the disaster.	The 2016 Louisiana flood was the worst natural disaster in theUnited States since Superstorm Sandy (in 2012). Between August8 and 15, 2016, extremely heavy rains pounded southern Louisianaand Mississippi, with several parts of Louisiana receiving 20 to 30in. of rain in just a few days (Di Liberto, 2016). Severe floodingensued, rendering 200 roadways impassable, including stretches oftwo interstat…	no	not described but article with the same participants and data are included in the review.	other	not described, describes content analysis	Granqvist, P., & Main, M. (2017). The Religious Attachment Interview (RAI). Unpublished manuscript, Uppsala University, Uppsala, Sweden. Palinkas, L. A. (2006). Qualitative approaches to studying the effects of disasters. In F. H. Norris, S. Galea, M. J. Friedman, & P. J. Watson (Eds.), Methods for disaster mental health research (pp. 158–173). New York, NY: Guilford Press. Hsieh, H.-F., & Shanno…	Several	Individual interviews. All participants completed in-depthqualitative interviews using a disaster-adapted version of the Re-ligious Attachment Interview (RAI;Granqvist & Main, 2017),which itself is adapted from the Adult Attachment Interview(George, Kaplan, & Main, 1996).The disaster-adapted RAI (RAI-D; seeDavis, Kimball, et al.,2018, for a copy) has 22 questions, most of which have one tothree f…		6 months	2	All 36 participants completed the RAI-D at 4 weeks postdisaster (Time 1 [T1]), and 29 of these participants (19% attrition) also completed the RAI-D at 6 months postdisaster (Time 2 [T2]).	36	65 interviews	irected(deductive) approach to content analysis, which involves “a de-ductive use of theory...tovalidate or extend conceptually atheoretical framework” (Hsieh & Shannon, 2005, p. 1281)—in thiscase, the religion-as-attachment model. Research Question 3 willbe explored using a conventional (inductive) approach to contentanalysis
Day, M. R., Thompson, A. R., Poulter, D. R., Stride, C. B., & Rowe, R. (2018). Why do drivers become safer over the first three months of driving? A longitudinal qualitative study. Accident; Analysis And Prevention, 117, 225-231.	Day, Thompson, Poulter, Stride and Rowe	2018	Why do drivers become safer over the first three months of driving? A longitudinal qualitative study	Accident; Analysis And Prevention	UK	longitudinal qualitative study (abstract)	We adopted an innovative longitudinal qualitative design, with thirteen newly qualified drivers completing a total of 36 semi-structured interviews, one, two and three months after acquiring a full UK driving license. The interviews probed high-risk factors for new drivers, as well as allowing space for generating novel road safety issues. (abstract)	new drivers	high-risk factors for new drivers, as well as allowing space for generating novel road safety issues	behavioural development, and other changes (this is from the sentence before the "aim" they have a longitudinal line of argument)	Thirteen newly qualified drivers (aged 17–19 years, 6 male, 7 female) who had passed their test within one month of their first interview were recruited through educational establishments and driving instructors in the North of England. This age and experience range was selected as being representative of young drivers at high crash risk (Williams and Carsten, 1989).	no		other	longitudinal qualitative design	Guest, G., Bunce, A., Johnson, L., 2006. How many interviews are enough? An experiment with data saturation and variability. SAGE J. 18, 59–82. http://dx.doi.org/10.1177/ 1525822X05279903. Flanagan, J.C., 1954. The critical incident technique. Psychol. Bull. 51, 327–358. http:// dx.doi.org/10.1037/h0061470. Hughes, H., Williamson, K., Lloyd, A., 2007. Critical incident technique. In: Lipu, S. (Ed…	One	Individual interviews. When driving changes were described, the questioning followed a critical incident technique (Flanagan, 1954; Hughes et al., 2007). This involved asking the interviewee to describe the cause and outcome of a critical incident, their feelings and perceptions of the situation,	no	3 months	3	drivers were interviewed at approximately 1 month, 2 months and 3 months after acquiring a full UK driving license	13	A total of 36 interviews were conducted; all but three participants took part in all three stages of data collection.	Thematic analysis
De Clercq, M., Roland, N., Brunelle, M., Galand, B., & Frenay, M. (2018). The delicate balance to adjustment: A qualitative approach of student's transition to the first year at university. Psychologica Belgica, 58(1), 67-90.	De Clercq, Rol , Brunelle, Gal and Frenay	2018	The Delicate Balance to Adjustment: A Qualitative Approach of Student's Transition to the First Year at University	Psychologica Belgica	Belgia	a longitudinal qualitative design (abstract)	More precisely, two main objectives underlie this approach: (1) to identify the key determinants and events of adjustment regarding the student’s experience; (2) to understand how these determinants and events interact in the adjustment process across the first year.	students in biology	key determinants and events of adjustment regarding the student’s experience	adjustment process across the first year	freshmen (11 women; 6 men) majoring in Biology from the Faculty of Science of a Belgian University. … the students should have made a direct transition between high school and university. In the Belgian educational context, the transition from high school to university is not always direct. Some teenagers decide to go abroad for one year between secondary education and university. Others change t…	no		other	longitudinal qualitative design	Willig, C. (2013). Introducing qualitative research in psychology. McGraw-Hill Education (UK). De Mol, J., & Buysse, A. (2008). The phenomenology of children’s influence on parents. Journal of Family Therapy, 30(2), 163–193. DOI: https://doi.org/10.1111/ j.1467-6427.2008.00424.x Zittoun, T. (2009). Dynamics of Life-Course Transitions: A Methodological Reflection. In: Valsiner, J., Molenaar, M. P.…	One	Individual interviews. In the first stage (at the beginning of the first year at university/real-time), students were asked to describe their perceptions of the academic context; the difficulties experienced and the way they intended to overcome them. The average duration of interviews in stage 1 was 20 minutes. In the second stage (one year after stage 1/post-hoc), the same students were asked t…		12	2	In the first stage (at the beginning of the first year at university/real-time), students were asked to describe their perceptions of the academic context; the difficulties experienced and the way they intended to overcome them. The average duration of interviews in stage 1 was 20 minutes. In the second stage (one year after stage 1/post-hoc), the same students were asked to give a retrospective …	17	Unclear if it was any drop outs or if all 17 remained for the second interview	Thematic analysis
DeGuzman, P. B., Colliton, K., Nail, C. J., & Keim-Malpass, J. (2017). Survivorship care plans: Rural, low-income breast cancer survivor perspectives. Clinical Journal of Oncology Nursing, 21(6), 692-698.	DeGuzman, Colliton, Nail and Keim-Malpass	2017	Survivorship Care Plans: Rural, low-income breast cancer survivor perspectives	Clinical Journal of Oncology Nursing	US	A longitudinal, descriptive, qualitative design with semistructured interviews was used. (abstract)	This pilot study explores posttreatment survivorship care planning execution, perception, and needs among rural, low-income cancer survivors. (abstract)	rural, low-income cancer survivors	care planning execution, perception, and needs		a National Cancer Institute–designated cancer center within the University of Virginia Health System in Charlottesville. Despite its large wealthy urban and exurban areas, Virginia contains very poor and rural regions. About 400,000 Virginians are cancer survivors (American Cancer Society, 2016), and about 13% of them live in rural areas (Rural Health Information Hub, 2017), where the poverty rat…	no		other	A longitudinal, descriptive, qualitative design		One	Individual interviews	no	6 months	3 (intitail, 3 months, 6 months)	Three telephone interviews were scheduled: one immediately or within the week of first contact, one three months later, and another at six months.	7	Three of the remaining seven completed three interviews, two completed two interviews, and two completed only one interview.	not named uses Sandelowski
den Herder-van der Eerden, M., Hasselaar, J., Payne, S., Varey, S., Schwabe, S., Radbruch, L., Van Beek, K., Menten, J., Busa, C., Csikos, A., Vissers, K., & Groot, M. (2017). How continuity of care is experienced within the context of integrated palliative care: A qualitative study with patients and family caregivers in five European countries. Palliative Medicine, 31(10), 946-955.	den Herder-van der Eerden, Hasselaar, Payne, Varey,, Schwabe, Radbruch, Van Beek, Menten, Busa, Csikos, Vissers and Groot	2017	How continuity of care is experienced within the context of integrated palliative care: A qualitative study with patients and family caregivers in five European countries	Palliative Medicine	Belgium, Germany, Hungary, the Netherlands and the United Kingdom	longitudinal qualitative study design	Therefore, this article examines how relational, informational and management continuity of care are experienced by patients with advanced cancer, chronic obstructive pulmonary disease (COPD) or heart failure and family caregivers receiving care from integrated palliative care initiatives in five European countries.	patients with advanced cancer, chronic obstructive pulmonary disease (COPD) or heart failure and family caregivers	continuity of care	continuity of care	integrated palliative care initiatives in five European countries. We selected integrated palliative care initiatives in five European countries (Belgium, Germany, Hungary, the Netherlands and the United Kingdom) using uniform selection criteria (Table 1) and an integrated palliative care working definition: Bringing together administrative, organisational, clinical and service aspects in order t…	yes	part of a multiple embedded case study conducted by the European InSup-C project that aimed to identify prerequisites for integrated palliative care.35	other	longitudinal qualitative study design		One	Individual interviews. We developed a uniform interview protocol for patient and family caregiver interviews that was used by all researchers performing the interviews		3 months	2	After obtaining written consent, patients and family caregivers participated in two semi-structured interviews with an interval of 3 months. Longitudinal interviewing allowed us to explore care experiences over time and confirm findings from the first interview.	152 patients, 92 care-givers	A total of 22 integrated palliative care initiatives were included mainly involving hospital- or hospice-based services in conjunction with home care services (Table 3). In all, 152 patients participated in the study: 15 in Belgium, 34 in Germany, 37 in Hungary, 31 in the Netherlands and 35 in the United Kingdom. The mean age was 68 years, the majority were female (56%) and had cancer (63%). Most…	qualitative content analysis
Denney-Koelsch, E. M., Côté-Arsenault, D., & Jenkins Hall, W. (2018). Feeling cared for versus experiencing added burden: Parents' interactions with health-care providers in pregnancy with a lethal fetal diagnosis. Illness, Crisis & Loss, 26(4), 293-315.	Denney-Koelsch, Côté-Arsenault and Wenkins Hall	2018	Feeling Cared For Versus Experiencing Added Burden: Parents' Interactions With Health-Care Providers in Pregnancy With a Lethal Fetal Diagnosis	Illness, Crisis & Loss	US	a longitudinal, phenomenological study (abstract)	The focus of this report is parents’ perspectives on health-care provider interactions from the time of prenatal diagnosis through postpartum.	parents’ Parent Experiences with Pregnancy with a Lethal Fetal Diagnosis	perspectives on health-care provider interactions	from the time of prenatal diagnosis through postpartum	A multistate sample of parents who chose to continue their pregnancies was recruited soon after the LFD was made, through health-care providers, word-of-mouth, and websites. The adult pregnant women, 18 years of age or older, received prenatal care from primary care providers, specialists, academic medical centers, and community hospice organizations.	yes	The authors conducted an NIH-funded longitudinal phenomenological study (‘‘Parent Experiences with Pregnancy with a Lethal Fetal Diagnosis’’ R21 NR012733-01A1) whose goal was to describe parents’ experiences of continuing pregnancy with a known LFD and to examine the parents’ needs and responses to health-care provider interactions across the prenatal, intrapartal, and postnatal periods. The focu…	phenomenology	longitudinal hermeneutic phenomenological study	Merleau-Ponty, M. (2005). The phenomenology of perception. (C. Smith, Trans.). New York, NY: Routledge. (Original work published 1945). Miles, M. B., Huberman, A. M., & Saldan˜ a, J. (2014). Qualitative data analysis: A methods sourcebook (3rd.). Los Angeles, CA: Sage.	several	In-depth interviews were conducted by the principal investigator (D. C. A.) inperson, over video conference, or by telephone, using an interview guide. The goal was to interview participants individually and jointly twice during pregnancy and twice after the baby’s birth and subsequent death.		unclear	4	In-depth interviews were conducted by the principal investigator (D. C. A.) inperson, over video conference, or by telephone, using an interview guide. The goal was to interview participants individually and jointly twice during pregnancy and twice after the baby’s birth and subsequent death.	Thirty parents (16 mothers and 14 partners) participated in one to five interviews during pregnancy and after the baby’s birth and death.	Thirty parents (16 mothers and 14 partners) participated in one to five interviews during pregnancy and after the baby’s birth and death.	not named
Donnellan, W. J., Bennett, K. M., & Soulsby, L. K. (2018). How does carer resilience change over time and care status? A qualitative longitudinal study. Aging & Mental Health, 1-7.	Donnellan, Bennett and Soulsby	2018	How does carer resilience change over time and care status? A qualitative longitudinal study	Aging & Mental Health	UK	A qualitative longitudinal study	Based on our original sample of 20 spousal dementia carers, the current study uses qualitative longitudinal methods to follow the care status transitions of 13 current and former spousal dementia carers, including: continuing home carers; former carers (institutionalised); and former carers (widowed). We address the following research objectives: i. To examine trajectories of resilience in spousa…	care givers to spous with dementia	to follow the care status transitions of 13 current and former spousal dementia carers	transitions …………. Trajectories over time	Participants were recruited from two dementia support groups and a care home in North West England.	yes	We purposively sampled 23 current and former spousal dementia carers. Participants were followed up by phone 1.5-3 years after the original interview. (First time interviews was a first project, refers to two earlier papers based on 1st time interviews)	other	the current study uses qualitative longitudinal methods	Guest, G., Bunce, A., & Johnson, L. (2006). How many interviews are enough? An experiment with data saturation and variability. Field Methods, 18(1), 59–82. Calman, L., Brunton, L., & Molassiotis, A. (2013). Developing longitudinal qualitative designs: Lessons learned and recommendations for health services research. BMC Medical Research Methodology, 13(14), 1–10. Charmaz, K. (1995). Grounded the…	one	Individual interviews	no	varied 18-36 months	2	The first author kept in touch with each of the original participants so that they could be followed up in a timely and appropriate way. No pre-arrangement to be re-interviewed was made at this stage due to the unpredictable symptomology and extended course of dementia care (Potgieter, Heyns, & Lens, 2012). Participants were followed up by phone 1.5-3 years after the original interview. The follo…	We purposively sampled 23 current and former spousal dementia carers.	We purposively sampled 23 current and former spousal dementia carers. Nine women and four men were willing to be re-interviewed:	three-stage hybrid method
Dowell, A., Stubbe, M., Macdonald, L., Tester, R., Gray, L., Vernall, S., Kenealy, T., Sheridan, N., Docherty, B., Hall, D.-H., Raphael, D., & Dew, K. (2018). A longitudinal study of interactions between health professionals and people with newly diagnosed diabetes. Annals of Family Medicine, 16(1), 37-44.	Dowell, Stubbe, Macdonald, Tester, Gray, Vernall, T. Kenealy, Sheridan, Docherty, Hall, Raphael and Dew	2018	A Longitudinal Study of Interactions Between Health Professionals and People With Newly Diagnosed Diabetes	Annals Of Family Medicine	New Zealand	A Longitudinal Study (title), and in article	We undertook video observation of a cohort of patients with newly diagnosed diabetes to gain an in-depth picture of communication and miscommunication processes within a primary health care team over time.	patients with newly diagnosed diabetes The unit of analysis was the collective set of all episodes of care for an individual patient. We reviewed data longitudinally for each patient and made comparisons across patients.	to gain an in-depth picture of communication and miscommunication processes within a primary health care team over time	processes within a primary health care team over time	Patients were recruited from general practices in the Auckland and Wellington regions of New Zealand. Ten practices were selected through academic and clinical contacts on the basis of their demographically diverse population bases and willingness to participate in intensive qualitative research.	no		other	qualitative research	37. Creswell JW. Research Design: Qualitative, Quantitative, and Mixed Methods Approaches. Thousand Oaks, CA: Sage Publications; 2013. Altheide DL, Johnson JM. Reflections on interpretive adequacy in qualitative research. In: Denzin NK, Lincoln YS, eds. The SAGE Handbook of Qualitative Research. 4th ed. Thousand Oaks, CA: Sage; 2011: 581-594.	one	We video-recorded the initial postdiagnosis consultation and all subsequent interactions between the patient and health practitioners for 6 months. Cameras were placed in an unobtrusive location in the consultation room. The videotapes were subsequently transcribed.	no	6 months	continious	We observed all interactions between 32 patients with newly diagnosed diabetes and their health professionals for 6 months. There was wide variation in the consultation pattern for the 32 patients over the 6-month period. The number of consultations per patient ranged from 1 to 12, and the overall duration of individual patient visits to health professionals was between 27 minutes and 7 hours, 12…	32	not described	Analysis entailed both linguistic and sequential analysis of individual interactions and texts, and broader ethnographic descriptions of diabetes care and its communication patterns and systems. Interaction analysis was used to examine the interactions at various key moments in the diabetic care pathway34
Draaisma, A., Meijers, F., & Kuijpers, M. (2017). Towards a strong career learning environment: Results from a Dutch longitudinal study. British Journal of Guidance & Counselling, 45(2), 165-177.	Draaisma, Meijers and Kuijpers	2017	Towards a strong career learning environment: results from a Dutch longitudinal study	British Journal of Guidance & Counselling	the Netherlands	The results described in this article are part of a longitudinal qualitative study	This longitudinal study is designed to gain theoretical and practical insight into the influence of the project ‘COG/SVE’ on the creation of a strong career learning environment. Moreover, this article describes how teachers and project managers of these schools perceive the developments in their own learning environment and the learning environment of their students, since the start of the proje…	teachers and project managers	the creation of a strong career learning environment	creation of … developments	schools …………. 20 participating schools in 6 different regions of the Netherlands … secondary vocational education schools	yes	The results described in this article are part of a longitudinal qualitative study, designed to investigate to what extent the project COG/SVE is an impulse for structural and cultural changes in the career learning environment in vocational education. We want to explore the influence of the project, over a time period of three years, in which four measurements are foreseen. In this article we de…	other	this article are part of a longitudinal qualitative study,		One	individual interviews but maybe measurements but not clear?		5-6 months (ca. it is not clearly described but gives an avarage from a table)	3	Over the period of October 2013 to January 2014, all participating teachers were approached for a semi-structured interview at a place and time of their choice. At the start of the first training day, the teachers completed a questionnaire on their personal motivation and aspirations regarding the project, and the existence of their schools’ policy and vision on career orientation and guidance. T…	Eventually, 50 teachers from 18 different schools from all parts of the Netherlands agreed to participate. Eventually, 38 project managers of 33 different secondary vocational education schools agreed to participate.	Time one: 238 participants interviews (?) but unclear what kind of data. Time 2: 50 interviews, time 3: 48+38 interviews	qualitative data analysis
Drake, E. K., & Urquhart, R. (2019). "Figure out what it is you love to do and live the life you love": The experiences of young adults returning to work after primary cancer treatment. Journal of Adolescent & Young Adult Oncology, 8(3), 368-372.	Drake and Urquhart	2019	Figure Out What It Is You Love to Do and Live the Life You Love: The Experiences of Young Adults Returning to Work After Primary Cancer Treatment	Journal of Adolescent & Young Adult Oncology	Canada	A prospective qualitative longitudinal method (abstract)	The aim of this study was to explore younger adults (YA) cancer survivors’ perspectives on and experiences with return to work (RTW) following primary cancer treatment.	younger adults cancer survivors	experiences of return to work	following	Not described. Participants were recruited through postson social media (Twitter and Facebook) and through news-letters and websites of national and local cancer organiza-tions and clinics. Participants self-selected to participate bycontacting the research team; they were not directly ap-proached for recruitment purposes.	yes	This qualitative study was part of a larger project exploringRTW experiences of working-age adults that was guided byFeuerstein et al.’s cancer and work model.	Phenomenology		19. Patton MQ (3rd Eds). Qualitative research and evaluation methods. Thousand Oaks, CA: SAGE Publications; 2002. 20. Calman L, Brunton L, Molassiotis A. Developing longitudinal qualitative designs: lessons learned and recommendations for health services research. BMC Med Res Methodol. 2013;13(1):14. 21. Hermanowicz JC. The longitudinal qualitative interview. Qual Sociol. 2013;36(2):189–208. 22. …	One	in-depth interviews over the phone		9 months	3	Data were collected through in-depth audiorecordedsemistructured telephone interviews with the same cancersurvivors at three time points: after their primary treatment, and at 3 and 9 months after their first interview.	5	14 interviews	thematic analysis
Dubé, T., Schinke, R., & Strasser, R. (2019). It takes a community to train a future physician: Social support experienced by medical students during a community-engaged longitudinal integrated clerkship. Canadian Medical Education Journal, 10(3), e5-e16.	Dubé, Schinke and Strasser	2019	It takes a community to train a future physician: social support experienced by medical students during a community-engaged longitudinal integrated clerkship	Canadian Medical Education Journal	Canada	none	The purpose of our study was to learn which sources of social support students sought out during arural-based LIC. Therefore, our purpose was to answer the following research question: Which, if any,sources of social support do students experienceduring a LIC in the context of rural family practice?	medical students year 3	sources of social support during longitudinal integrated clerkship	during a LIC	The longitudinal integrated clercship (LIC) at the Northern Ontario School of Medicine(NOSM) in Canada consists of all students spending eight months in one of 15 rural and northern communities where they live, learn, and work during their clerkship.	no	not stated	other	For social constructivists,learning is a process influenced socially and culturally by the environments in which individuals are surrounded.31,32Informed by this research paradigm	32. Lincoln YS, Guba EG. The constructivist credo. Left Coast Press, 2013. 33. Evans J, Jones P. The walking interview: methodology, mobility and place. Appl Geogr. 2011;31:849–58. 34. Moles K. A walk in thirdspace: place, methods and walking. Sociol Res Online. 2008;13:2. 35. Sheller M, Urry J. The new mobilities paradigm. Environ Plan A. 2006;38:207-26. 36. Anderson J. Talking whilst walking: A…	One	At three months into the clerkship, data were collected using a guided walk (lasting between one to two hours), which is an effective and innovative qualitative method where the participant walks(i.e., leads)the researcher through contexts felt to most significantly represent their lived experiences while engaged in a conversational interview.		9 months	probably 3	The pre-clerkship interviews occurred one month prior to the start of students’ placement. At three months into the clerkship, data were collected using a guided walk. The post-clerkship interviews, which ranged between 40 and 75 minutes, took place immediately following the completion of the LIC to understandparticipants’ consolidated perspectives regarding their description of the supportive be…	12	not clear since it is not stated how many participants that tpook part in each interview.	inductive thematic analysis
Due‐Christensen, M., Willaing, I., Ismail, K., & Forbes, A. (2019). Learning about type 1 diabetes and learning to live with it when diagnosed in adulthood: Two distinct but inter‐related psychological processes of adaptation a qualitative longitudinal study. Diabetic Medicine, 36(6), 742-752.	Due‐Christensen, Willaing, Ismail and Forbes	2019	Learning about Type 1 diabetes and learning to live with it when diagnosed in adulthood: two distinct but inter‐related psychological processes of adaptation A qualitative longitudinal study	Diabetic Medicine	UK and Denmark	none	explored the adaptation processes that adults experience after their diagnosis of Type 1 diabetes in order to elicit areas for supportive intervention to enhance the psychosocial well-being of adults during this phase of life with Type 1 diabetes.	adults diagnosed with type 1 diabetes within the last 3 years	experiences and adaption process	adaption processes	Participants were recruited via large specialist diabetes centres in London (n=2) and Copenhagen (n=3),	no		Narrative research		13 Riessman CK. Narrative Methods for the Human Sciences. Thousand Oaks, CA: Sage Publications Inc, 2008. 14 Malterud K, Siersma VD, Guassora AD. Sample size in qualitative interview studies: Guided by information power. Qual Health Res 2016; 26: 1753–1760. 15 Grossoehme D, Lipstein E. Analyzing longitudinal qualitative data: the application of trajectory and recurrent cross-sectional approaches.…	One	Individual interviews		6 months	2	The first author (M.D.) conducted face-to-face in-depth interviews with people recently diagnosed with Type 1 diabetes. Follow-up interviews were conducted over the telephone 6 months from the first interviews.	30	58 interviews	The analysis followed the principles of the narrative thematic approach outlined by Riessman
Dunivan, G. C., McGuire, B. L., Rishel Brakey, H. A., Komesu, Y. M., Rogers, R. G., & Sussman, A. L. (2019). A longitudinal qualitative evaluation of patient perspectives of adverse events after pelvic reconstructive surgery. International Urogynecology Journal. 30, 2023–2028.	Dunivan, McGuire, Rishel Brakey, Komesu, Rogers and Sussman	2019	A longitudinal qualitative evaluation of patient perspectives of adverse events after pelvic reconstructive surgery	International Urogynecology Journal	US	none	to longitudinally examine how patients view surgical AEs overtime and explore how such perspectives may change from the preoperative period to 6 months after surgery. (AE=adverse events).	Women planning pelvic floor disorder surgery	perspectives on surgical adverse events and how the perspectives change (over 6 months)	overtime, change,	The study was conducted at the University of New Mexico.	no		other	Mixed method study? "Qualitative methodology" nämns. ÅA: mixed methods	no references for qualitative methods just for quantitative, scales	One	Individual interviews	We administered these questionnaires in order to describe the cohort’sover all symptom bother and sense of improvement.Räknas de in eller inte? Kan ej se om det framgår om de är analyserade - bedömer som ej analyserade? ÅA: At each time point, participants completed a variety ofquestionnaires prior to the interview. At the preoperative in-terview, we obtained demographic information, the PelvicFl…	approximatley 11 months	3	Each participant participated in three interviews by the same trained research coordinator.	20	60 interviews	not named
Dury, S. (2018). Dynamics in motivations and reasons to quit in a Care Bank: A qualitative study in Belgium. European Journal of Ageing, 15(4), 407-416.	Dury	2018	Dynamics in motivations and reasons to quit in a Care Bank: a qualitative study in Belgium	European Journal of Ageing	Belgium	A planned prospective longitudinal study involving qualitative focus group interviews ………… A planned prospective longitudinal qualitative interview design involving focus group interviews (Calman et al. 2013; Hermanowicz 2013)	Given the previously established importance of examining (changes in) motives for and reasons to quit time bank volunteering, we investigated what motivates people to start and what encourages or prevents them from continuing, and whether these motivations change throughout the project. In addition, we examined the moderating effects of individual and contextual factors that may play a role in th…	volunteers	motivates people to start and what encourages or prevents them from continuing, and whether these motivations change throughout the project	what motivates people to start and what encourages or prevents them from continuing, and whether these motivations change throughout the project …………….. changes in motives and reasons ……….. change participants’ reasons over time	The data for this study, collected between December 2013 and November 2014, are derived from the NeighborhoodPension project in Brussels, Belgium. …………. The services that are exchanged are very diverse, ranging from social services (making breakfast for a neighbor, meeting for tea, and playing cards) to more practical services (getting medicine from the pharmacy, helping with administration, and …	unclear - part of a larger project but not described as part of a larger research project. No references or additional aim. It can be seen as an evaulation study beside a wellfare project		other	prospective longitudinal qualitative interview design	Calman L, Brunton L, Molassiotis A (2013) Developing longitudinal qualitative designs: lessons learned and recommendations for health services research. BMC Med Res Methodol 13:14 Hermanowicz J (2013) The longitudinal qualitative interview. Qual Sociol 36:189–208 Hennink MM (2007) International focus group research: a handbook for the health and social sciences. Cambridge University Press, Cambri…	several	Focus group interviews. The volunteers and beneficiaries are invited to a monthly gathering with the project coordinator to evaluate the project. As group meetings might pose an obstacle for some people to give their opinion on the project, a questionnaire was developed for use at two time points and filled out anonymously.	yes	11 months	4	The study took place during the first year of the project. ……… The volunteers and beneficiaries are invited to a monthly gathering with the project coordinator to evaluate the project. As group meetings might pose an obstacle for some people to give their opinion on the project, a questionnaire was developed for use at two time points and filled out anonymously. ................. with four interv…	13	The four focus groups included almost every volunteer, so the number of participants per focus group increased: the first involved all five volunteers, the second involved six (out of seven who were volunteering at the time), the third involved five (out of eight), and the forth involved all thirteen volunteers.	thematic content analysis (Braun and Clarke 2006). Uses both thematic references and content analysis references
Eaton Russell, C., Widger, K., Beaune, L., Neville, A., Cadell, S., Steele, R., Rapoport, A., Rugg, M., & Barrera, M. (2018). Siblings’ voices: A prospective investigation of experiences with a dying child. Death Studies, 42(3), 184-194.	Eaton Russell, Widger, Beaune, Neville, Cadell, Steele, Rapoport, Rugg and Barrera	2018	Siblings’ voices: A prospective investigation of experiences with a dying child	Death Studies	Canada	prospective, longitudinal qualitative study	study aimed to fill some of the research gaps by examining healthy siblings’ perspectives of their experiences when a brother or sister was dying. Specifically, we investigated: (a) siblings’ involvement with the dying child and (b) the impact of involvement on siblings’ grief, growth, and coping and their interpersonal world within and outside the family.	siblings to dying children	involving with dying sibling, healthy sibling interpersonal world	Unclear	pediatric palliative care	no		other	interpretative descriptive	Thorne, S., Kirkham, S. R., & O’Flynn-Magee, K. (2004). The analytic challenge in interpretive description. International Journal of Qualitative Methods, 3(1), 1–11 Braun, V., & Clarke, V. (2013). Successful qualitative research. Thousand Oaks, CA: Sage. Thorne, S. (2008). Interpretive description. Walnut Creek, CA: Left Coast Press. Daly, K. (2007). Qualitative methods for family studies and hum…	One	Individual interviews	no	3 months (up to), (12 weeks)	3	Eligible siblings were invited to take part in at least one individual, in-depth, semistructured interview prior to the ill child’s death and repeated interviews at intervals of at least 6 weeks for a maximum of three interviews prior to the death and one after the death (Figure 1). Time 2, Time 3, and Bereavement interviews included reflection on previous interviews for the RA to clarify our ong…	10 siblings from 7 families	10 interviews time point 1, 5 interviews time point 2, 4 interviews time point 3	interpretative description Thorne
Eg, M., Frederiksen, K., Vamosi, M., & Lorentzen, V. (2017). How family interactions about lifestyle changes affect adolescents' possibilities for maintaining weight loss after a weight-loss intervention: A longitudinal qualitative interview study. Journal of Advanced Nursing (John Wiley & Sons, Inc.), 73(8), 1924-1936.	Eg, Frederiksen, Vamosi and Lorentzen	2017	How family interactions about lifestyle changes affect adolescents' possibilities for maintaining weight loss after a weight-loss intervention: a longitudinal qualitative interview study	Journal of Advanced Nursing	Denmark	a longitudinal qualitative interview study	Thus, the purpose of this study is to examine how the family interactions related to lifestyle changes influence the adolescent’s potential for maintaining weight loss after participating in a weight-loss treatment programme.	family -- To investigate the family’s significance to managing the lifestyle change, we interviewed the adolescent and the parents.	how the family interactions related to lifestyle changes influence the adolescent’s potential for maintaining weight	maintaining		yes	a weight-loss treatment programme ………. To chart the long-term effect, we have studied 10 families over 5 years, counting from the end of a 1-year treatment programme running throughout 2010. The programme, called ‘ROS 2010’, was a multidisciplinary family-based weight-loss treatment programme, conducted through a paediatric department in Denmark. The goals for the ROS 2010 adolescents (i.e. prima…	other	We applied a Qualitative Research Interview method as described by Kvale & Brinkmann (2014), , thereby seeking to understand the world from the participants’’ perspectives. In keeping with the hermeneutic tradition with the key elements of understanding and interpretation (Gadamer 2004), we have, over a 5-year period, investigated the lived experiences of participants in a weight-loss treatment p…		One	Individual interviews. To investigate the family’s significance to managing the lifestyle change, we interviewed the adolescent and the parents.		60 months (5 years)	3	To examine how family interactions influence the adolescent’s potential for maintaining weight loss, we chose to follow families who participated in ROS 2010 (see Figure 1), covering a 5-year period after treatment ended. To learn what was considered important long term, we interviewed the families three times over a 5-year period, from 2010 to 2015. The first interview took place when the progra…	38 participants, 19 adolecents, 19 parents - 28 intervies (some together)	The 10 invited families all wished to participate in this study. All 10 families took part in interviews rounds 1 and 2 and seven families also took part in interview round 3 in 2015, 5 years post-ROS. The total number of interviews was 79	not a named analysis approach
Elberg Dengsø, K., Tjørnhøj-Thomsen, T., Oksbjerg Dalton, S., Christensen, B. M., Hillingsø, J., & Thomsen, T. (2019). It's all about the CA-19-9. A longitudinal qualitative study of patients' experiences and perspectives on follow-up after curative surgery for cancer in the pancreas, duodenum or bile-duct. Acta Oncologica, 58(5), 642-649.	Elberg Dengsø, Tjørnhøj-Thomsen, Oksbjerg Dalton, Marcel Christensen, Hillingsø and Thomsen	2019	It's all about the CA-19-9. A longitudinal qualitative study of patients' experiences and perspectives on follow-up after curative surgery for cancer in the pancreas, duodenum or bile-duct.	Acta Oncologica	Denmark	A longitudinal qualitative study (title)	explore patients’ experiences of follow-up to get a sense of their perspectives on the rehabilitative scope of the current follow-up (within the first year after surgery and adjuvant chemotherapy with curative intent.)	patients attending current follow-up after treatment for cancer in the pancreas, duodenum or bile-duct.	patient experience and perspectives	Within the first year	The study took place at a specialized center in a University Hospital in The Capital Region of Denmark	no		other	qualitative longitudinal descriptive design - räknas detta? ÅA: ja de har uttryckt det som att detta är den design de valt. En av vår reviews forskningsfrågor handlar ju också om man kan se longitudinell kval metod som en design. Så det är spännande.	[10] Patton MQ. Qualitative research & evaluation methods – integrating theory and practice. 4 ed. United States of America: Sage Publications Inc; 2015. 832 p. [14] Tong A, Sainsbury P, Craig J. Consolidated criteria for reporting qualitative research (COREQ): a 32-item checklist for interviews and focus groups. Int J Qual Health Care. 2007;19:349–357. [15] Thorne S. Interpretive description. Qu…	One	Individual interviews	no	9 months	3	The patients chose whether they wished to be interviewed at home, at work or at the hospital.	12	36	inductive content analysis
Elliott, K., & McVicar, A. (2018). The impact of prolonged disorders of consciousness on the occupational life of family members. Neuropsychological Rehabilitation, 28(8), 1375-1391.	Elliott and McVicar	2018	The impact of prolonged disorders of consciousness on the occupational life of family members	Neuropsychological Rehabilitation	UK	A longitudinal design	To explore the process of occupational adaptation within a group of primary caregivers.	partners/primary caregivers	Occupational adaptation	Processes …. Adaptation	Royal hospital for neuro-disability,	no		other	A pleuristic approach of mixed methods	Greene, J. C., & Caracelli, V. J. (1989). Toward a conceptual framework for mixed-method evaluation designs. Educational Evaluation and Policy Analysis, 11, 255–274. Burnard, P. (1991). A method of analysing interview transcripts in qualitative research. Nurse Education Today, 11, 461–466. Miles, M. B., & Huberman, A. M. (1994). Qualitative data analysis: A source book ofnew methods. Thousand Oak…	Several	time diary, questionnaire, qualitative interviews	yes	6 months	2	Areas of change between 6- and 12-month data were identified	6	unclear, data from three sources	Burnard’s(1991) analysis with influences from Miles and Huberman’s(1994) coding patterns.
Elliott, M. C., Shuey, E. A., Zaika, N., Mims, L., & Leventhal, T. (2017). Finding home: A qualitative approach to understanding adolescent mothers' housing instability. American Journal of Community Psychology, 60(1), 55-65.	Elliott, Shuey, Zaika, Mims and Leventhal	2017	Finding Home: A Qualitative Approach to Understanding Adolescent Mothers' Housing Instability	American Journal Of Community Psychology	US	This study used longitudinal, ethnographic data (abstract) …	The aim of this study was to use a qualitative approach to explore the unique experiences of low-income Latina adolescent mothers who depended on their families of origin for housing and parenting support and had unstable living conditions (into another doubling up situation—a horizontal move—or into independent housing—a vertical move).	low-income Latina adolescent mothers	experiences	unstable living conditions	The ethnographic component of the study included a nonrandom sample of low-income (<200% of 1998 poverty line) families living in moderate to high poverty neighborhoods (>20% families in poverty; N = 256), recruited in 1999 through formal child care settings (e.g., Head Start), WIC programs, churches, and other public assistance agencies. Families in the ethnography had a focal child age four or …	yes	This study used data from the ethnographic portion of Welfare, Children, and Families: A Three-City Study (“Three-City Study”), a longitudinal, mixed methods investigation of children and adolescents’ well-being following welfare reform in Boston, Chicago, and San Antonio (see Winston et al., 1999 for detailed description). Uses subset: We chose to focus on adolescent participants who depended on…	Ethnography	This study used data from the ethnographic portion of Welfare, Children, and Families: A Three-City Study a longitudinal, mixed methods investigation of children and adolescents’ well-being following welfare reform in Boston,		One	Individual interviews. The goal of these repeated ethnographic interviews was to gain an indepth understanding of neighborhood effects, employment and parenting experiences, and children’s development.		36 months (3 years)	unclear	For each participant, all interviews relevant to housing, parenting, and family dynamics over the 3 years were coded.	15 Latina adolescent mothers who faced housing instability for at least 1 year during the study period and relied on their origin families and often some other family for housing support.	unclear	grounded theory, secondary analysis of subsample,
Eriksson, C., Erikson, A., Tham, K., & Guidetti, S. (2017). Occupational therapists experiences of implementing a new complex intervention in collaboration with researchers: A qualitative longitudinal study. Scandinavian Journal of Occupational Therapy, 24(2), 116-125.	Eriksson, Erikson, Tham and Guidetti	2017	Occupational therapists experiences of implementing a new complex intervention in collaboration with researchers: a qualitative longitudinal study	Scandinavian Journal Of Occupational Therapy	Sweden	a qualitative longitudinal study	The aim of this study was to identify and describe the process of how OTs in collaboration with researchers implemented a client-centred ADL intervention for persons with stroke.	Occupational therapists	the process of how OTs in collaboration with researchers	process	The OTs worked in inpatient geriatric rehabilitation, inpatient medical rehabilitation or home-based rehabilitation.	yes	This study is a part of a RCT research project Life After Stroke (LAS 2) [19,20]. a client-centred ADL intervention for persons with stroke.	other	The design of this study was a qualitative longitudinal study consisting of focus group interviews [21].		One	Focus group interviews		10 months	3	Thirty-three OTs participated in the focus group interviews (five groups with five to nine participants), two, six and 12 months (between 2009 and 2011) after completing the workshop that preceded the implementation of the intervention.	33	Thirty-three OTs participated in the focus group interviews (five groups with five to nine participants), two, six and 12 months (between 2009 and 2011) after completing the workshop that preceded the implementation of the intervention. In the workshop 44 OTs were participating but 11 of them refrained taking part in the focus groups due to workload, reorganization or change of work.	The analysis was based upon Charmaz’s (2006) interpretation of grounded theory [24] as a flexible guideline and took place mainly after the data collection had ended.
Essery, R., Kirby, S., Geraghty, A. W. A., & Yardley, L. (2017). Older adults' experiences of internet-based vestibular rehabilitation for dizziness: A longitudinal study. Psychology & Health, 32(11), 1327-1347.	Essery, Kirby, Geraghty and Yardley	2017	Older adults' experiences of internet-based vestibular rehabilitation for dizziness: A longitudinal study	Psychology & Health	UK	A longitudinal study (title) This longitudinal qualitative study (abstract)	the study aimed to determine the acceptability and accessibility of an internet-based intervention for delivering VR to older adults with dizziness, and to provide insight into how they engage with, and utilise, such an intervention. To achieve this, the main objectives of the study were to gain a greater understanding of: how older adults experience internet-based VR, including their perceptions…	older adults with dizziness	acceptability and accessibility of an internet-based intervention for delivering VR	their experiences change over the intervention period.	individuals aged 50 and over who experienced vestibular-related dizziness and were willing and able to access the intervention. Participants were recruited from NHS primary care, the Meniere’s Society, and the University of Southampton’s Psychology participant volunteer pool.	yes	Given the aforementioned digitalisation of supporting materials for self-managed conditions, alongside older adults’ increasing use of the internet (Office for National Statistics, 2010), we developed a standalone internet-based VR intervention (Balance Retraining) to support self-management of their dizziness. In the current qualitative study, we explored older adults’ experiences of engaging in…	Phenomenology	longitudinal qualitative interview study A phenomenological approach was taken to ensure that participants’ experiences and perceptions (inga fenomenologiska källor)	Patton, M. Q. (1990). Qualitative evaluation and research methods (2nd ed.). Thousand Oaks, CA: Sage. Braun, V., & Clarke, V. (2006). Using thematic analysis in psychology. Qualitative Research in Psychology, 3,77–101. doi:10.1191/1478088706qp063oa Glaser, B. G., & Strauss, A. L. (1967). The discovery of grounded theory: Strategies for qualitative research. Chicago, IL: Aldine.	One	Individual interviews	no	1,5 months	3 time points	Participants were asked to access ‘Balance Retraining’ at least once per week for six weeks. After accessing their first online session, a convenient time for their first telephone interview was arranged with either the first author or another member of the research team. ............ Eighteen adults aged fifty and over who experienced dizziness used the ‘Balance Retraining’ internet intervention…	18	All participants took part in the first interview, fifteen took part in the second, and fourteen in the third, resulting in a total of 47 interviews	Thematic analysis was carried out according to guidance set out by Braun and Clarke (Braun & Clarke, 2006) with the addition of memoing and constant comparison techniques advocated by grounded theory (Glaser & Strauss, 1967)
Evans, B. C., Coon, D. W., Belyea, M. J., & Ume, E. (2017). Collective care: Multiple caregivers and multiple care recipients in mexican american families. Journal Of Transcultural Nursing, 28(4), 398-407.	Evans, Coon, Belyea and Ume	2017	Collective Care: Multiple Caregivers and Multiple Care Recipients in Mexican American Families	Journal Of Transcultural Nursing	US	longitudinal mixed-methods study (abstract) This article presents a secondary analysis of our recently completed, mixed-methods, longitudinal, multisite, qualitative descriptive study of 110 MA families providing informal care to older family members (introduction)	We will describe the understudied phenomenon of multiple caregiving in MA (Mexican American) families, asking, “How do MA families adapt to the informal care needs of more than one older family member?”	(Mexican American) families	multiple caregiving	adapt to the informal care needs	families who lived along the U.S. border, an area with multiple economic and health barriers	yes	This article presents a secondary analysis of our recently completed, mixed-methods, longitudinal, multisite, qualitative descriptive study of 110 MA families providing informal care to older family members (Evans et al., 2009).	Case study	We used a case-oriented, qualitative descriptive design (Sandelowski, 2000) with a concurrent, complementary, quantitatively driven, variable-oriented component to search for similarities and differences, identify broad patterns, and enable the drawing of inferences	Sandelowski, M. (2000). Combining qualitative and quantitative sampling, data collection, and analysis techniques in mixed-method studies. Research in Nursing & Health, 23, 246-255. doi:10.1002/1098-240X(200006)23:3%3C246::AIDNUR9%3E3.0.CO;2-H Morgan, D. (1998). Practical for combining qualitative and quantitative methods: Applications to health research. Qualitative Health Research, 8, 362-376. …	Several	Data from MA caregiving families were derived from standardized instruments and semistructured interviews (6 home visits at 10-week intervals over 15 months, involving multiple caregivers and care recipients). Unclear if interviews were individual or as a family.	yes	2,5 months	6	Data from MA caregiving families were derived from standardized instruments and semistructured interviews (6 home visits at 10-week intervals over 15 months, involving multiple caregivers and care recipients).	The sample for this secondary analysis included 16 MA families, comprising 22 primary caregivers (individuals who provided assistance with two or more activities of daily living [ADLs]) and 25 care recipients	unclear	We used case-oriented research methods (Miles, Huberman, & Saldana, 2014)
Fadyl, J. K., Theadom, A., Channon, A., & McPherson, K. M. (2019). Recovery and adaptation after traumatic brain injury in New Zealand: Longitudinal qualitative findings over the first two years. Neuropsychological Rehabilitation, 29(7), 1095-1112.	Fadyl, Theadom, Channon and McPherson	2019	Recovery and adaptation after traumatic brain injury in New Zealand: Longitudinal qualitative findings over the first two years	Neuropsychological Rehabilitation	New Zealand	Longitudinal qualitative findings (title) ongitudinal qualitative study (abstract)	To investigate the subjective experiences of recovery and adaptation over the first two years after having a TBI from the perspective of people with the injury and the family and/or friends most closely involved in their recovery (who we termed“significant others”). The specific research questions focused on what helped or hindered recovery and adaptation over time following TBI.	people with TBI, their family and /or friends closely involved in the recovery	experiences of recovery and adaption and what helped and hindered those.	adaption over time	In the Hamilton and Auckland regions of New Zealand.	no		other	The design was a longitudinal qualitative descriptive study within a post-positivist epistemology.	Thorne, S., Kirkham, S. R., & MacDonald-Emes, J. (1997). Interpretive description: A noncategorical qualitative alternative for developing nursing knowledge. Research in Nursing & Health, 20(2), 169–177. Charmaz, K. (2006). Constructing grounded theory: A practical guide through qualitative analysis. Los Angeles: SAGE. Fadyl, J. K., Channon, A., Theadom, A., & McPherson, K. M. (2017). Optimising …	One	Individual interviews. Some interviews had more than one participant (for example the person with TBI + family member		24 months (2 years)	3	The data was in the form of interviews at approximately 6, 12 and 24 months following the TBI. Although the study protocol specified time-points, we allowed a 3-month window (e.g., 6–9 months, 12–15 months) to respond to individual circumstances. The interviews took place at a location chosen by participants–most often at their homes	62	152	Thematically analysed using techniques drawn from Charmaz (2006)
Farr, M. (2018). Power dynamics and collaborative mechanisms in co-production and co-design processes. Critical Social Policy, 38(4), 623-644.	Farr	2018	Power dynamics and collaborative mechanisms in co-production and co-design processes	Critical Social Policy	UK	qualitative longitudinal method	describe empirical examples of co-production and co-design processes within public services	Breast cancer patients and staff (policy managers, senior managers, service managers, project co-ordinators and front-line staff)	Co-production and co-design practices	processes	Health and Administration contexts in hospital	no		Case study		Pawson R (2006) Evidence-based policy: A realist perspective. London: Sage. Pawson R and Tilley N (1997) Realistic evaluation. London: Sage.	Several	Observations, feedback sheets from co-design events, organisational documents and reports, and individual and focus group interviews	no	22 or 19 mo in the resp cases	case 1: 33 meetings and events +25 interviews ; case 2: 8 meetings and events, + 18 interviews + 3 focus group interviews	Within the NHS case I attended meetings and events (n = 33) of the EBCD project (Bate and Robert, 2007) from initiation to completion within breast cancer services at two large hospitals in an urban area over a period of 22 months, to understand the implementation process. Within this 71 feedback sheets from staff (n = 46) and patients (n = 25) were collated through co-design events. At the compl…	seven patients and 17 different staff (unclear)	25 + 18 interviews 3 focus group interviews + 71 feedback sheets	Realist evaluation
Felice, J. P., Geraghty, S. R., Quaglieri, C. W., Yamada, R., Wong, A. J., & Rasmussen, K. M. (2017). 'Breastfeeding' without baby: A longitudinal, qualitative investigation of how mothers perceive, feel about, and practice human milk expression. Maternal & Child Nutrition, 13(3), e12426.	Felice, Geraghty, Quaglieri, Yamada, Wong and Rasmussen	2017	Breastfeeding' without baby: A longitudinal, qualitative investigation of how mothers perceive, feel about, and practice human milk expression	Maternal & Child Nutrition	US	A longitudinal, qualitative investigation (title)	Here, we describe results related to the mothers' perspective: their attitudes and perceptions of, strategies for, and experiences with pumping, including their motivations to pump, how they incorporated pumping into infant feeding practices and other obligations, and how their attitudes, perceptions, practices, and experiences changed over time.	mothers pumping breast milk	attitudes and perceptions of, strategies for, and experiences with pumping breast milk	experiences changed over time	women producing HM across three counties in upstate New York	yes	Results related to the infants' perspective—that is, the storage, preparation, and provision of pumped HM—are reported elsewhere (Felice et al., 2016a).	other	We used qualitative methods	Fereday, J., & Muir‐Cochrane, E. (2006). Demonstrating rigor using thematic analysis: A hybrid approach of inductive and deductive coding and theme development. International Journal of Qualitative Methods, 5,80–92. Guest, G., MacQueen, K. M., & Namey, E. E. (2011). Applied thematic analysis. Thousand Oaks, CA: Sage.	Several	interviews and observations	no	12 months (n=12) at longest. all mothers remained until 1 year postpartum (n = 12) or infant HM‐feeding cessation prior to 1 year (n = 7).	varied 2 - 8, 2 interviews: 1; 3 interviews: 2; 4 interviews: 3; 5 interviews: 2; 6 interviews: 4; 7 interviews: 6; 8 interviews: 2.	we conducted longitudinal, in‐depth interviews and observations between September 2011 and November 2013 …………. The first interview was conducted late in mothers' pregnancies. The first postpartum interview occurred at 2 weeks postpartum to allow time for mothers to establish feeding at the breast while minimizing recall bias. Afterward, mothers were contacted every 2 to 3 weeks via email or text …	n = 20	108 interviews were conducted (range 2–7 interviews per participant	deductive thematic analysis
Fletcher, A. C., & Blair, B. L. (2018). Youth disclosure about friendships across the transition to middle school. Journal of Early Adolescence, 38(5), 606-628.	Fletcher and Blair	2018	Youth Disclosure About Friendships Across the Transition to Middle School	Journal of Early Adolescence	US	longitudinal qualitative investigation (abstract) Within the current study, we analyze longitudinal qualitative data, (methods)	To considered youth disclosure to parents about friends as well as parents’ responses to such disclosure across the transition to middle school. Research Question 1: How does disclosure to parents about friends change or remain stable across the transition to adolescence? Given that adolescence is a time of increased desire for independence from parents, we hypothesize that the most typical patte…	children in 5,6,7, grades	Yout dosclosure and parents' response, and global patterns of change or stability across time.	change or remain stable across the transition to adolescence …………….. shape stability and change	elementary schools in southeastern USA	yes	Data for this study came from a longitudinal mixed-methods study of youth friendships and well-being. Initial participants in the quantitative portion of this study (data not analyzed for this article) were 404 third graders. ighty-five percent of eligible children across the nine schools received parental consent for participation in the larger project. Twenty participants were selected from the…	other	A longitudinal mixed-methods study	Miles, M. B., Huberman, A. M., & Saldana, J. (2014). Qualitative data analysis: A methods sourcebook. Thousand Oaks, CA: Sage.	One	Data were collected from interviews using a standard interview protocol developed for the project, but probed responses using their own follow-up questions based on initial youth response	No	24 months	3	Youth were interviewed once a year for three consecutive years (Grades 5, 6, and 7) with these grades selected because the transition from elementary school to middle school occurred in sixth grade in the county in which children resided. Three participants dropped out after Grade 5 and were replaced with three additional youth from the quantitative study who were similar in terms of gender, ethn…	20	60 interviews "Youth were interviewed once a year for three consecutive years (Grades 5, 6, and 7) with these grades selected because the transition from elementary school to middle school occurred in sixth grade in the county in which children resided. Three participants dropped out after Grade 5 and were replaced with three additional youth from the quantitative study who were similar in terms …	not named
Forslund, A.-S., Jansson, J.-H., Lundblad, D., & Söderberg, S. (2017). A second chance at life: People's lived experiences of surviving out-of-hospital cardiac arrest. Scandinavian Journal of Caring Sciences, 31(4), 878-886.	Forslund, Jansson, Lundblad and Söderberg	2017	A second chance at life: people's lived experiences of surviving out-of-hospital cardiac arrest	Scandinavian Journal Of Caring Sciences	Sweden	A qualitative, longitudinal design	The aim of this study was to elucidate meanings of people’s lived experiences and changes in daily life during their first year after surviving OHCA (out-of-hospital cardiac arrest)	people surviving OHCA (out-of-hospital cardiac arrest)	lived experiences and changes in daily life	changes in daily life	This study was conducted in northern Sweden, home to approximately 500 000 people and eight hospitals, which all treat patients suffering myocardial infarction (MI). They were recruited from four different hospitals as they visited the cardiac nurse for a mandatory follow-up approximately 1 month after experiencing cardiac arrest.	no	Meanings of the participants’ lived experiences of surviving OHCA 1 month after the event have been presented in a previous study (35). This study presents participants0 lived experiences 6 and 12 months after the OHCA event. Think about: How a larger study is cut down in managable pieces? Different time points in different studies or different questions in different studies? Different kind of da…	Phenomenology	A phenomenological hermeneutic interpretation inspired by the French philosopher Paul Ricoeur was used (36,37)	36 Ricoeur P. Interpretation Theory: Discourse and the Surplus of Meaning. 1976, Texas Christian University Press, Fort Worth, TX. 37 Lindseth A, Norberg A. A phenomenological hermeneutical method for researching lived experience. Scand J Caring Sci 2004; 18: 145–53. 39 Kvale S, Brinkmann S. Den kvalitativa forskningsintervjun. 2009, Studentlitteratur AB, Lund. 40 Mishler E. Research Interviewing…	One	Individual interviews	no	6 months	2 (Meanings of the participants’ lived experiences of surviving OHCA 1 month after the event have been presented in a previous study (35). This study presents participants lived experiences 6 and 12 months after the OHCA event.)	Meanings of the participants’ lived experiences of surviving OHCA 1 month after the event have been presented in a previous study (35). This study presents participants0 lived experiences 6 and 12 months after the OHCA event. ……………. Therefore, narrative interviews were conducted 1 month (35), 6 and 12 months after OHCA in order to elucidate meanings and capture changes in daily life over time.	11	unclear, maybe 22 interviews (11x at two timepoints)	phenomenological hermeneutic interpretation
Foster, K., Mitchell, R., Van, C., Young, A., McCloughen, A., & Curtis, K. (2019). Resilient, recovering, distressed: A longitudinal qualitative study of parent psychosocial trajectories following child critical injury. Injury, 50, 1605-1611.	Foster, Mitchell, Van, Young, McCloughen and Curtis	2019	Resilient, recovering, distressed: A longitudinal qualitative study of parent psychosocial trajectories following child critical injury	Injury	Australia	A Longitudinal Qualitative Study (titel)	This study aimed to explore parent experiences and psychosocial support needs and identify parent psychosocial trajectories in the 12 months following child critical injury. Research questions were: What are the psycho social trajectories for parents of critically injured children in the 12 months following injury? What factors facilitate or hinder the psycho social trajectories of parents of cri…	parents to a critically injured child	parents trajectories and social support needs	trajectories in the 12 months following child critical injury	recruitedfromfourpaediatrichospitalsinthreestatesofAustralia			other	longitudinal prospective qualitative design	[24] Holland J . Timescapes: living a qualitative longitudinal study. Forum Qual Sozialforschung / Forum: Qual Soc Res 2011;12(3):9 Art. . [25] Creswell JW , Clark V . Designing and conducting mixed methods research. 2nd ed. Thousand Oaks: Sage; 2011 . [27] Creswell JW . Qualitative inquiry and research design: choosing among five approaches. 2nd ed. Thousand Oaks: Sage; 2007 . [28] Saldaña J . T…	One	Semi-structuredin-depth interviews		12 months	3	over three time points: the immediate hospital period post-child injury (face-to-face); 6 months following injury, and 12 months following injury (telephone).	27	81 interviews	To maintain a systematic process for coding, an adapted version of the longitudinal qualitative coding matrix tem-plate by Saldana[28] of descriptive categories (a summary eighth category one nabling and hindering factors was added by there-searchers ) was used.
Freytag, J., Jiang, Z. J., Giordano, T. P., Westbrook, R. A., McCurdy, S. A., Njue-Marendes, S., & Dang, B. N. (2019). What patient involvement means to new patients at two HIV clinics: A longitudinal, qualitative study. Patient Education & Counseling, 102(8), 1535-1540.	Freytag, Jiang, Giordano, Westbrook, McCurdy, Njue-Marendes and Dang	2019	What patient involvement means to new patients at two HIV clinics: A longitudinal, qualitative study	Patient Education & Counseling	US	A longitudinal, qualitative study (title)	we aim to:1) present definitions of patient involvement from the perspectives of patients seeing a new provider, 2)examine physician behaviors that patients identify as cultivating their involvement,and 3) identify some of the ways new patient expectations of involvement change after their first visit with a new provider.	adults (over 18 y/o) with HIV-diagnosis	Patients perspectives and expectations on involvment	change after their first visit	In-person interviews were conducted with 21 patients from Michael E.DeBakey Veterans Affairs (VA )Medical Center and 35 patients from Thomas Street Health Center (TSHC)in Houston, Texas.	yes	This study is part of a larger qualitative study that aim to understand patients’ expectations and experiences of care with a new HIVprovider, as well as the change over time in these expectations and experiences (NIHK23MH100965).	other	qualitative study	[26] H.L. Stuckey, The second step in data analysis: coding qualitative research data, J. Soc. Health Diabetes 01 (2015) 7–10. [27] H.F. Hsieh, S.E. Shannon, Three approaches to qualitative content analysis, Qual. Health Res. 15 (2005) 1277–1288. [28] D. Grossoehme, E. Lipstein, Analyzing longitudinal qualitative data: the application of trajectory and recurrent cross-sectional approaches, BMC Re…	One	Individual interviews	no	between 6-12 months	3	participants were interviewed at three different times.The first interview(T1)took place prior to participants’ initial visit with the provider.The second interview(T2) took place within two weeks of the initial visit, and the third(T3) at 6–12 months after the first visit.	56	138 interviews	content analysis i abstract, iterative approach i data analysis
Froh, E. B., Deatrick, J. A., Curley, M. A. Q., & Spatz, D. L. (2017). Mothers of infants with congenital diaphragmatic hernia describe "breastfeeding" in the neonatal intensive care unit: "As long as it's my milk, i'm happy". Journal Of Human Lactation, 33(3), 524-532.	Froh, Deatrick, Curley and Spatz	2017	Mothers of Infants With Congenital Diaphragmatic Hernia Describe "Breastfeeding" in the Neonatal Intensive Care Unit: "As Long as It's My Milk, I'm Happy"	Journal Of Human Lactation	US	A prospective, longitudinal qualitative descriptive design	This article focuses explicitly on the mothers’ descriptions of what breastfeeding truly means in the context of a diagnosis of CDH (Congenital Diaphragmatic Hernia ) for their infants and the course of care in the NICU setting.	mothers with an infant with a diagnosis of CDH (Congenital Diaphragmatic Hernia )	what breastfeeding truly means	the course of care in the NICU setting	NICU (Neonatal Intensive Care Unit) setting a large level 3 NICU in an urban, northeastern pediatric hospital. The NICU within this hospital is a 98-bed unit with a lactation team led by a PhD prepared nurse researcher and including two International Board Certified Lactation Consultants (1.2 FTEs) dedicated to seeing families only in the NICU.	yes	The findings presented in this article are part of a larger primary study. The aims of the primary study were to (a) describe the mother’s experience surrounding the initiation of lactation via expression and the process of transitioning to direct breastfeeding from her perspective, (b) describe facilitators and barriers that influence the mother’s decisions to initiate and continue on a path to …	other	prospective, longitudinal, qualitative descriptive study.	Sandelowski, M. (2000). Whatever happened to qualitative description? Research in Nursing Health, 23(4), 334-340. Elo, S., & Kyngas, H. (2008). The qualitative content analysis process. Journal of Advanced Nursing, 62(1), 107-115. doi:10.1111/j.1365-2648.2007.04569.x	One	Individual interviews	no	unclear - during the time at NICU	three interview phases (some were interviewed multiple times in each phase)	Informants were enrolled in the study within 1 week of admission to the NICU. ……. informants were interviewed from the point of enrollment (enrollment occurred within the 1st week of admission to the NICU) until the mothers met their personal lactation or breastfeeding goal or until the infant’s discharge from the NICU. Given the variable length of stay for the infants, if a mother remained at a …	11 CDH infant–mother dyads	unclear	conventional content analysis (Elo & Kyngas, 2008)
Frost, J., Wingham, J., Britten, N., Greaves, C., Abraham, C., Warren, F. C., Jolly, K., Doherty, P. J., Miles, J., Singh, S. J., Paul, K., Rod Taylor, Dalal, H. (2019). Home-based rehabilitation for heart failure with reduced ejection fraction: Mixed methods process evaluation of the REACH-HF multicentre randomised controlled trial. BMJ Open, 9(8), e026039-e026039.	Frost, Wingham, Britten, Greaves, Abraham, Warren, Jolly, Doherty, Miles, Singh, Paul, Taylor and Dalal	2019	Home-based rehabilitation for heart failure with reduced ejection fraction: mixed methods process evaluation of the REACH-HF multicentre randomised controlled trial	BMJ Open	UK	none	The work reported here constituted part of the REACH-HF process evaluation that assessed intervention fidelity, patients’ and caregivers’ experiences of trial participation and sought to identify change processes that may be responsible for change in HRQoL (the trial primary outcome).5–7	people with heart failure taking part in an patient education program 19 participated, but also caregivers and facilitators in the program	experience of trial and changing processes	change processes	In brief, 216 patients and 97 care-givers were recruited to the trial from four geographical regions (Birmingham, Cornwall, Gwent and York) across the UK.	yes	This paper reports on a process evaluation conducted in parallel to the REACH-HF trial. In brief, 216 patients and 97 care-givers were recruited to the trial from four geographical regions (Birmingham, Cornwall, Gwent and York) across the UK. One hundred and seven patients with 53 care-givers were randomised to REACH-HF intervention and usual care (intervention group), and 109 patients and 44 car…	Case study	A mixed methods process evaluation using linked data from multiple sources to build individual case studies was undertaken	12. Bazeley P. Integrating analysis in mixed methods research. London: Sage, 2018. 13. Moore GF, Audrey S, Barker M, et al. Process evaluation of complex interventions: Medical Research Council guidance. BMJ 2015;350:h1258. 17. Saldana J. Longitudinal qualitative research: analysing change through time. California: AltaMira, 2003. 20. Miles M, Huberman A, Saldana J. Qualitative data analysis: a m…	Several	Qualitative data: For the 19 patients who constituted our sampling frame (two to three patients per facilitator across the four regions), facilitators were required to audio-record all face-to face meetings with the patient (typically one 90 min and two to three 45 min sessions), and subsequent telephone contacts (typically three to six per patient). Qualitative interviews were conducted in peopl…	yes	12 months	During trail and 2 follow up interviews	Qualitative interviews were conducted in peoples’ homes (or by telephone if a visit was not possible), and field notes collated. Patients and caregivers were contacted by the interviewer and, with their consent, interviewed at 4 and 12 months after the baseline facilitator visit.	19	unclear, a lot of data material was used but it is not specified which datamaterial was used for this article.	not named
Fu, F., Chen, L., Sha, W., Chan, C. L. W., Chow, A. Y. M., & Lou, V. W. Q. (2018 published online). Mothers' grief experiences of losing their only child in the 2008 sichuan earthquake: A qualitative longitudinal study. Omega – Journal of Death and Dying, 2020, 81(1) 3–17.	Fu, Chen, Sha, Chan, Chow and Lou	2018	Mothers' Grief Experiences of Losing Their Only Child in the 2008 Sichuan Earthquake: A Qualitative Longitudinal Study	Omega	China	A qualitative longitudinal study (title)	Thus, this study not only explores bereaved mothers’ longitudinal grief experiences since the earthquake but also examines their experiences within the Chinese sociocultural contexts.	bereaved mothers’	longitudinal grief experiences	longitudinal grief experiences	On May 12, 2008, an 8.0-magnitude earthquake hit Wenchuan, Sichuan Province, China. The earthquake killed more than 70,000 people and left about 20,000 missing (Jacobs, Wong, & Huang, 2009). In Dujiangyan, one of the most severely affected areas, a large number of school buildings collapsed and hundreds of children died.	no		Phenomenology	This study took an interpretative phenomenological approach (IPA)	Smith, J. A., Flowers, P., & Larkin, M. (2009). Interpretative phenomenological analysis: Theory, method and research. London, England: Sage. Willig, C. (2008). Introducing qualitative research in psychology (2nd ed.). Maidenhead, England: Open University Press.	One	Individual interviews	no	24 months	4	A total of six bereaved mothers participated in the total of four times of interviews over 2 years.	6	6 interviews at 4 timepoints.	interpretative phenomenological approach
Gallagher, K., Partridge, C., Tran, H. T., Lubran, S., & Macrae, D. (2017). Nursing & parental perceptions of neonatal care in Central Vietnam: A longitudinal qualitative study. BMC Pediatrics, 17(1), 161-161.	Gallagher, Partridge, Tran, Lubran and Macrae	2017	Nursing & parental perceptions of neonatal care in Central Vietnam: a longitudinal qualitative study	BMC Pediatrics	Vietnam	a longitudinal qualitative study (titel)	The aim of this study was to explore changes in the perceptions and attitudes of nurses and parents towards their experiences in the neonatal unit following a neonatal nursing education intervention in a single neonatal unit in central Vietnam.	The study included 2 groups of participants: parents of infants admitted to the neonatal unit and neonatal nurses who had undertaken the education intervention.	changes in the perceptions and attitudes neonatal unit following a neonatal nursing education	changes… following	in a single neonatal unit in central Vietnam	yes	Details of the course development, structure and evaluation can be found in West et al. (unpublished data) [12]. address this, funding was successfully sought in 2013 to implement a structured neonatal nursing programme over an 18 month period in one pilot hospital in Vietnam. The programme, led and coordinated by Canterbury Christ Church University (CCCU), was implemented on a bi-monthly basis w…	other	We chose a qualitative longitudinal research design	12. West G. Development of a neonatal nursing educational intervention for neonatal nurses in Vietnam (under development). 13. Carduff E, Murray SA, Kendall M. Methodological developments in qualitative longitudinal research: the advantages and challenges of regular telephone contact with participants in a qualitative longitudinal study. BMC Res Notes. 2015;8:142–52. 14. Kondraki NL, Wellman NS, …	One	Individual interviews	no	18 months	3	All neonatal nurses (n = 26) who had completed the training were invited to participate for the duration of the study, involving 3 interviews at 6 monthly intervals over the course of 18 months.	A total of 83 individuals participated in the study over 3 time points, including the same 16 nurses and 67 different parents at each time point (T1: 21 parents T2 & T3: 23 parents, respectively). ................ The study included 2 groups of participants: parents of infants admitted to the neonatal unit and neonatal nurses who had undertaken the education intervention. Different parents were r…	Parent participants were invited to participate in a semistructured interview exploring their attitudes and experiences towards neonatal care. During the first time point, 21 parents volunteered to participate in the interviews. ……. The aim was therefore to recruit a similar number of parents at T2 and T3, where 23 parents respectively volunteered to participate. ...............	manifest content analysis
Gammons, R. W., Carroll, A. J., & Carpenter, L. I. (2018). "I never knew I could be a teacher": A student-centered MLIS fellowship for future teacher-librarians. Portal: Libraries & the Academy, 18(2), 331-362.	Gammons, Carroll and Carpenter	2018	I Never Knew I Could Be a Teacher: A Student-Centered MLIS Fellowship for Future Teacher-Librarians	Portal: Libraries & the Academy	US	a mixed methods and longitudinal study	results from a mixed methods and longitudinal study identifying the successful components of RTF (Research and Teaching Fellowship) and charting the development of teacher efficacy and identity among participants (abstract). Our research had two directives: (1) to identify successful components of RTF and better understand how these elements contributed to the growth and development of participan…	students seeking a master’s of library and information science and their teachers, mentors and administratve staff	identifying the successful components of RTF (Research and Teaching Fellowship) and charting the development of teacher efficacy and identity	development of teacher efficacy and identity …….. Growth	The Research and Teaching Fellowship (RTF) of the University of Maryland Libraries in College Park is a three-semester teacher training program for students seeking a master’s of library and information science (MLIS) degree.	no		grounded theory	mixed methods	37. Barney G. Glaser and Anselm L Strauss, The Discovery of Grounded Theory: Strategies for Qualitative Research (Chicago: Aldine, 1967). 38. Johnny Saldana, The Coding Manual for Qualitative Researchers (Thousand Oaks, CA: SAGE, 2016).	several	We looked to focus group transcripts, end-of-semester reflections, and exit surveys to identify common themes.37 ur research design utilizes the assessment methods suggested for such education programs: reviewing students’ teaching reflections, administering survey questionnaires, conducting individual interviews, and holding focus groups.35 Over the course of RTF, fellows complete three types of…	yes	18 months	unclear. Assingments turnned in every week, focusgroup at the end and survey	To evaluate the effectiveness of RTF, we conducted a study spanning two cohorts who graduated in spring 2016 and spring 2017. Each program had three terms ~18 months	Participants included six fellows from the spring 2016 and spring 2017 cohorts, six mentor librarians, and three library administrators. The first cohort (class of 2016) had four MLIS students, all of whom completed the requirements of RTF. The second cohort (class of 2017) also had four MLIS students. Two of the 2017 cohort completed the requirements of RTF and are included in this study. Two ot…	unclear	a modified grounded theory approach
Garbett, K., Harcourt, D., & Buchanan, H. (2017). Using online blogs to explore positive outcomes after burn injuries. Journal of Health Psychology, 22(13), 1755-1766.	Garbett, Harcourt and Buchanan	2017	Using online blogs to explore positive outcomes after burn injuries	Journal of Health Psychology	UK, US, Australia	These longitudinal data are particularly useful in trauma recovery research (methods)	This study aims to build on current research by qualitatively exploring the positive outcomes that may be present following a burn injury since previous literature offers limited knowledge into the specific positive aspects that may arise in this growing population. Acknowledging that they can exist, and exploring specifically what they are, is an important step in guiding burn care practice and …	burn survivors	positive outcomes that may be present following a burn injury	following a burn injury	Internet: "were entered into popular search engines such as Google and Bing. This proved fruitful in ensuring relevant blogs existed. One interesting finding from this scoping exercise was the identification of several burn survivor blogs conducted via a video link (known as ‘vlogs’), so these were incorporated as an additional data source." "Once we had established that relevant data were availa…	no		other	not stated	Beer D and Burrows R (2007) Sociology and, of and in Web 2.0: Some initial considerations. Sociological Research Online 12: 17. Charmaz K (1991) Good Days, Bad Days: The Self in Chronic Illness and Time. New Brunswick, NJ: Rutgers University Press. Hookway N (2008) ‘Entering the blogosphere’: Some strategies for using blogs in social research. Qualitative Research 8: 91–113. Wilkinson D and Thelw…	One	blog texts	no	not described	not described	not described	10	not described	thematic analysis
Garner, C. D., McKenzie, S. A., Devine, C. M., Thornburg, L. L., & Rasmussen, K. M. (2017). Obese women experience multiple challenges with breastfeeding that are either unique or exacerbated by their obesity: Discoveries from a longitudinal, qualitative study. Maternal & Child Nutrition, 13(3), e12344.	Garner, McKenzie, Devine, Thornburg and Rasmussen	2017	Obese women experience multiple challenges with breastfeeding that are either unique or exacerbated by their obesity: discoveries from a longitudinal, qualitative study	Maternal & Child Nutrition	US	a longitudinal, qualitative study (title)	Our aim was to understand obese women’s experiences and perceptions longitudinally, with a normal-weight comparison group, beginning in late pregnancy and continuing through 3months post-partum, to identify key experiences and barriers that are unique to or more common among obese women.	obese women’s with an infant	key experiences and barriers (to breatfeeding) that are unique to or more common among obese women.	beginning in late pregnancy and continuing through 3months post-partum	were recruited in upstate NewYork using flyers and brochures in obstetrics, midwifery and family medicine practices, hospital maternity ward tours, birthing classes and prenatal care programmes as well as using chain referral.	no		other	A longitudinal, qualitative study (abstract)	Hsieh H.&Shannon S.E. (2005) Three approaches toqualitative content analysis. Qualitative Health Research 15, 1277–1288.	one	individual interviews	no	6 months	5	Semi-structured interviews were conducted by CDG with each participant: (1) during pregnancy and postpartum at (2) 7 to 10days, (3) 6weeks and (4) 3months, with (5) an optional 6-month phone call. If a woman stopped breastfeeding before 3 months, a final interview was conducted after breastfeeding ceased. Each woman completed between two and five interviews between February 2013 and August 2014.	22 women were followed longitudinally.	not described	used content analysis with a combination of predetermined and emergent codes (Hsieh & Shannon 2005)
Garrett, S. B., Abramson, C. M., Rendle, K. A., & Dohan, D. (2019). Approaches to decision-making among late-stage melanoma patients: A multifactorial investigation. Supportive Care in Cancer, 27(3), 1059-1070.	Garrett, Abramson, Rendle and Dohan	2019	Approaches to decision-making among late-stage melanoma patients: a multifactorial investigation	Supportive Care in Cancer	US	Exploratory analysis of longitudinal qualitative data (abstract)	to characterize late-stage melanoma patients holistically as treatment decision-makers.	late-stage melanoma patients	characterize melanoma patients desicion-making holisitically	unclear	Data from late-stage melanoma patients who participated in the Cancer Patient Deliberation Study at a West Coast academic medical center.	yes	This paper draws on the Cancer Patient Deliberation Study, a multi-site ethnographic study . We use data from late-stage melanoma patients who participated in the Cancer Patient Deliberation Study at a West Coast academic medical center. The study recruited and prospectively followed patients with metastatic disease as they exhausted standard therapies. Trained fieldworkers observed patient-oncol…	Ethnography		34. Abramson CM, Dohan D (2015) Beyond text. Sociol Methodol 45: 272–319. https://doi.org/10.1177/0081175015578740 35. Abramson CM, Joslyn J, Rendle KA, Garrett SB, Dohan D (2018) The promises of computational ethnography: improving transparency, replicability, and validity for realist approaches to ethnographic analysis. Ethnography 19(2):254–284. https://doi.org/10.1177/ 1466138117725340 38. Ma…	Several	Trained fieldworkers observed patient-oncologist clinical encounters, conducted in-depth semi-structured interviews with patients and their caregivers about treatment and clinical trial decision-making, and collected structured demographic data from each patient.	no	up to 24 months	up to 3	In this analysis, we use data from the 13 melanoma patients in the study. They participated in 1 to 3 clinic observations (n = 26) and 1 to 3 interviews (n = 29) between Fall 2011 and Fall 2013.	13	not described	constant comparative approach and heatmaps
Gaskin, K. L., Wray, J., & Barron, D. J. (2018). Acceptability of a parental early warning tool for parents of infants with complex congenital heart disease: A qualitative feasibility study. Archives of Disease In Childhood, 103(9), 880-886.	Gaskin, Wray and Barron	2018	Acceptability of a parental early warning tool for parents of infants with complex congenital heart disease: a qualitative feasibility study	Archives Of Disease In Childhood	UK	This was a longitudinal qualitative feasibility study, within a constructivist paradigm.	To explore the acceptability and feasibility of a parental early warning tool, called the Congenital Heart Assessment Tool (CHAT), for parents going home with their infant between first and second stage of surgery for complex congenital heart disease.	parents of infants with complex congenital heart disease needing sugery	parents' signs of deteriortion using CHAT, the feasibility of CHAT,( Congenital Heart Assessment Tool) using traffic lights as a model parents acceptability of CHAT	adequately prepared for going home, thinking back to when you first went home	One tertiary children’s cardiac centre in the UK.	yes	This longitudinal study was part of a mixed methods feasibility study.10A dialectical perspective,17 in which both qualitative and quantitative data collection methods work together, was the best stance due to the underpinning epistemological assumptions of the study (interpretivism, constructivism and positivism), guiding each of the integral components.	other	a mixed methods feasibility study. feasability	Greene JC, Caracelli VJ. Defining and describing the paradigm issue in mixed-method evaluation. New Directions for Evaluation 1997;199- Guba EG. Criteria for assessing the trustworthiness of naturalistic inquiries. Educ Commun Tec 1981;28:75–91. Braun V, Clarke V. Using thematic analysis in psychology. Qual Res Psychol2006;3:77–101.	Several	Semistructured interviews with parents, single or in couples, after an intervention (use of CHAT). field notes, audit trail, reflexive notes - FINDINGS only use the interviews	yes	5, 7 months (max 228 days at the ward)	4	before dischare, 2 weeks after discharge, 8 weeks after discharge, and after stage 2 surgery	12	The data set reported here included 22 interviews, lasting from 9.49 to 59.29min, totaling 486.44hours.	six-phased thematic approach of Braun and Clarke19
Gelpí-Acosta, C., Guarino, H., Benoit, E., Deren, S., Pouget, E. R., & Rodríguez, A. (2019). Injection risk norms and practices among migrant Puerto Rican people who inject drugs in New York City: The limits of acculturation theory. International Journal of Drug Policy, 69, 60-69.	Gelpí-Acosta, Guarino, Benoit, Deren, Pouget and Rodríguez	2019	Injection risk norms and practices among migrant Puerto Rican people who inject drugs in New York City: The limits of acculturation theory	International Journal of Drug Policy	US	a longitudinal qualitative study	This study identifies the P.R. (Puerto Rico )-native norms supporting the continued injection risk behavior of migrant Puerto Rican PWID (people who inject drugs) in NYC to inform a culturally appropriate risk-reduction intervention. (abstract)	Migrant Puerto Rican adults who inject drugs	persisting injection risks despite improved drug-related services	the continued injection risk behavior	The study was conducted in the Bronx, New York City.	no		Grounded theory		Patton MQ (2001). Qualitative Research and Evaluation Methods, 3rd Edition. Thousand Oaks, CA: Sage Publications, Inc. Magnani R, Sabin K, Saidel T, & Heckathorn D (2005). Review of sampling hard-to-reach and hidden populations for HIV surveillance. AIDS, 19(Suppl 2), S67–S72. Glaser Barney, and Strauss Anselm. 1967 The discovery of grounded theory. Chicago: Aldine.	Several	At baseline, we conducted semi-structured interviews using an interview guide focused on the following domains: 1) sociodemographics; 2) formative years; 3) drug use history; 4) environments where drug use occurred, including access to prevention services; 5) injection norms learned in PR; 6) reasons for risky injection in P.R. and in NYC; 7) reasons for migration; 8) experiences with prevention …	no	12 months	2 interviews and monthly follow ups for 10 months	At baseline, we conducted semi-structured interviews using an interview guide. After baseline, we conducted semi-structured monthly face-to-face follow-ups, and asked participants to provide updates on behavioral risks and utilization of HIV and HCV prevention, testing andtreatment services, etc. Exit interviews took place 12 months after baseline and used a semi-structured guide.	40	Of 40 migrants completing the baseline interview, 20 were recent and 20 were longer-term. Monthly follow-ups were conducted with 35 (87.5%) and exit interviews with 34 (85%).	Grounded theory approach
Gilliland, S. (2017). Physical therapist students' development of diagnostic reasoning: A longitudinal study. Journal of Physical Therapy Education, 31(1), 31-48.	Gilliland	2017	Physical Therapist Students' Development of Diagnostic Reasoning: A Longitudinal Study	Journal of Physical Therapy Education	US	A Longitudinal Study (title), similar description in abstract and aim.	this qualitative study examined how PT students’ diagnostic reasoning processes develop through their coursework and clinical experiences.	physio therapy students	diagnostic reasoning processes develop through their coursework and clinical experiences.	develop through their coursework and clinical experiences.	This study took place in the doctor of physical therapy program at a small private western university in the United States.	yes	A clinical role-play of a patient case scenario was used to assess students’ approaches to diagnostic reasoning.24 This study builds on a cross-sectional analysis of clinical reasoning in first- and third-year PT students that includes a full explanation of the rationale for the method.25	other	qualitative	27. Ericsson KA, Simon HA. Protocol Analysis: Verbal Reports as Data. Rev ed. Cambridge, MA: The MIT Press; 1993. 28. Lundgren-Laine H, Salantera S. Think aloud technique and protocol analysis in clinical decision-making reserach. Qual Health Res. 2009;20(4):565-575. 29. Jensen JJ. Evaluating in a healthcare setting: a comparison between concurrent and retrospective verbalisation. Human-Computer …	one	Fieldnotes and interviews. The researcher met with each student individually in a quiet room. The student practiced a think-aloud task prior to the case scenario role-play. The researcher then gave the student a brief description of the patient, including the patient’s age, sex, and location of pain. The student was instructed to ask the researcher questions about the patient based on the element…	no	18 months (ca) (second to fifth semester)	3	a random sample of 6 student volunteers was selected from the first-year class at the beginning of their second semester of course work. To ensure data saturation, an additional 2 students completed the case scenario and interview during their first year. Analyses of these additional cases indicated reasoning patterns present within the first 6 participants, and thus the additional 2 were not inc…	6 students	6 students * 2 time points	thematic analysis
Godino, L., Jackson, L., Turchetti, D., Hennessy, C., & Skirton, H. (2018). Decision making and experiences of young adults undergoing presymptomatic genetic testing for familial cancer: A longitudinal grounded theory study. European Journal Of Human Genetics, 26(1), 44-53.	Godino, Jackson, Turchetti, Hennessy and Skirton	2018	Decision making and experiences of young adults undergoing presymptomatic genetic testing for familial cancer: a longitudinal grounded theory study	European Journal Of Human Genetics	Italy	a longitudinal design was used a longitudinal grounded theory study (titel)	explore the psychosocial implications of presymptomatic testing for hereditary cancer in Italian youngadults aged 18–30 years	new young consultand making an appointment for the cancergenetics clinic	psychosocial implications of presymptomatic testing for hereditary cancer	unclear	Hospital, Genetics Unit of St.Orsola-Malpighi Hospital (Bologna, Italy)	no		Grounded theory		Corbin JM, Strauss AL. Basics of qualitative research : techniquesand procedures for developing grounded theory. 2014.	One	face -to face interview data set reported here included 22 interviews, lasting from 9.49	no	7 months	3	Each participant was interviewed on three separate occasions: one month before GC, and 2 weeks and 6 months, respectively, after GC.	15	42 inteviews	analysed using the grounded theory method
Goedken, C. C., Moeckli, J., Cram, P. M., & Reisinger, H. S. (2017). Introduction of Tele-ICU in rural hospitals: Changing organisational culture to harness benefits. Intensive & Critical Care Nursing, 40, 51-56.	Goedken, Moeckli, Cram and Reisinger	2017	Introduction of Tele-ICU in rural hospitals: Changing organisational culture to harness benefits	Intensive & Critical Care Nursing	US	a longitudinal qualitative study (abstract)	Our study expands this research through a qualitative investigation of rural ICU staff perceptions of Tele-ICU. We conducted a longitudinal qualitative study of three rural ICUs located in the upper Midwest of the United States to illuminate ways in which Tele-ICU can best serve rural facilities. For our study, clinicians and ICU administrators in rural ICUs were asked to discuss perceptions of T…	rural ICU staff	perceptions of Tele-ICU	before and after	The first advanced Tele-ICU in the Veterans Health Administration (VHA) was implemented in the VA Midwest Health Care Network (VISN 23) starting in 2011. The goal was to increase access to intensivists and reduce treatment variability across ICUs in the regional network. VISN 23 serves more than 400,000 geographically dispersed veterans from ten rural Midwestern states (Anderson, 2011), including…	yes	Our research team conducted a qualitative evaluation of the implementation (Moeckli et al., 2013). For this paper we focus on interviews and observations from the rural sites.	other	not described	Crabtree, B.F., Miller, W.L., 1999. Doing qualitative research, second edition. Sage Publications, Thousand Oaks, CA. Agar, M.H., 1996. The professional stranger: an informational introduction to enthnography, second edition. Emerald Group Publishing, Bingley, UK. Pope, C.M.N., 2006. Qualitative research in health care, third edition. Blackwell Publishing Ltd., Malden, MA.	Several	Individula interviews and focus groups. We conducted in-person group and individual semi-structured interviews with a convenience sample of ICU nurses, medical and surgical physicians, respiratory therapists and ICU administrators (including the nurse manager) at one rural ICU. We also conducted phone interviews with ICU nurse managers and key staff at two additional rural ICUs.	no	12 months	3	Both phone and in-person interviews were conducted one to three weeks before (T1), six to 12 weeks after (T2) and 12 months after (T3) Tele-ICU activation to capture participant exposure to and experience with Tele-ICU during different stages of implementation. The interview guides were developed to assess staff perceptions, expectations and attitudes related to the Tele-ICU. Data were collected …	24 (A total of twenty-four rural staff participated in focus groups and/or in-depth interviews.)	unclear	thematic content analysis of all interviews, with content codes assigned to categorise passages (Agar, 1996; Pope, 2006).
González, M. G., Kelly, K. N., Dozier, A. M., Fleming, F., Monson, J. R. T., Becerra, A. Z., Aquina, C. T., Probst, C, P., Hensley B. J., Sevdalis, N., & Noyes, K. (2017). Patient perspectives on transitions of surgical care: Examining the complexities and interdependencies of care. Qualitative Health Research, 27(12), 1856-1869.	González, Kelly, Dozier, Fleming, Monson, Becerra, Aquina, CProbst, Hensley, Sevdalis and Noyes	2017	Patient Perspectives on Transitions of Surgical Care: Examining the Complexities and Interdependencies of Care	Qualitative Health Research	US	semistructured longitudinaln interviews	The goal of this study is to examine the surgical care pathway from the patient’s point of view to identify experiences and events that influence patient outcomes (e.g., a patient’s satisfaction, anxiety, and discharge readiness) in an effort to improve care transitions and reduce patient burden.	adult patients undergoing colon or rectal resection (either benign or malignant indication) at a medical center	examine the surgical care pathway from the patient’s point of view to identify experiences and events that influence patient outcomes	the surgical care pathway	academic medical center in upstate New York	no		Grounded theory	Elisabeth: der er mange kilder, ikke rigtig noget stringens her	Castellani, B., & Hafferty, F. W. (2009). Sociology and complexity science: A new field of inquiry (p. 280). Germany: Springer Science & Business Media. Brink, E., Dellve, L., Hallberg, U., Abrahamsson, K. H., Klingberg, G., & Wentz, K. (2006). Constructing grounded theory: A practical guide through qualitative analysis. International Journal of Qualitative Studies on Health and Well-being, 1, 18…	One	Semistructured interviews were used to gather data from patients concerning their experiences, including their perceptions of the quality of hospital staff and services, the discharge planning process, support systems, and their own home environments. Patients were interviewed over the phone on three occasions: the day following discharge, a week later after the first interview, and a month after…	No	1.5 months	3	Patients were interviewed over the phone on three occasions: the day following discharge, a week later after the first interview, and a month after discharge. Questions were modified over the course of the study based on study findings to maximize the information attained.	20	61	Grounded theory combined by the SACTS toolkit
Gordon, L., Jindal-Snape, D., Morrison, J., Muldoon, J., Needham, G., Siebert, S., & Rees, C. (2017). Multiple and multidimensional transitions from trainee to trained doctor: A qualitative longitudinal study in the UK. BMJ Open, 7(11), e018583-e018583.	Gordon, Jindal-Snape, Morrison, Muldoon, Needham, Siebert and Rees	2017	Multiple and multidimensional transitions from trainee to trained doctor: a qualitative longitudinal study in the UK	BMJ Open	UK	Qualtitative longitudinal study (title)	to address the research gaps identified above by including trainees working in a range of specialties and contexts, and through its longitudinal study design, follows participants as they move from trainee to trained doctor roles. Our research questions are: (1) What MMTs are experienced as participants move from trainee to trained doctor? (2) What facilitates and hinders doctors’ successful tran…	trainee doctors	transition experiences	follow participants as they move from trainee to trained doctor roles - transition experiences	This study was conducted in the context of postgraduate medical training in the UK National Health Service.	no		Narrative research	Multiple and multidimenstional transitions theory as the underpinning conceptual framework ÅA: longitudinal narrative inquiry was the chosen methodology.	Crotty M. The foundations of social research: meaning and perspective in the research process. California: Sage Publications, 1998. Monrouxe LV. Solicited audio diaries in longitudinal narrative research: a view from inside. Qual Res 2009;9:81–103. Ritchie J, Spencer L. Qualitative data analysis for applied policy research. In: Bryman A, Burgess RG, eds. Analysing qualitative data. London: Routle…	Several	first invited to semistructured interviews with the first author. Participants were asked about their broad understandings and perceptions of the trainee– trained doctor transition, to discuss how they anticipated managing over the coming months, and finally, to share any stories they believed would affect the process of transition. All those participating in the entrance interviews were then inv…	None	12 months	Unclear 3 interviews - however there might have been a number of LADs.	first invited to semistructured interviews … The initial interviews sensitised participants to the type of stories they could share in their LADs (eg, adapting to new roles; their relationship with colleagues or transitions they were experiencing in other aspects of their lives)......Finally, participants were invited to an exit interview, which focused on the ‘long story’ of their transition. Pa…	20	20 entrance interviews, 18 persons contributed with written diaries (range between 1-15), 18 exit interviews	Thematic Framework analysis
Graham-Wisener, L., Hanna, J., Collins, L., & Dempster, M. (2019). Psychological adjustment in patients post-curative treatment for oesophageal cancer: A longitudinal interview study. Psychology & Health, 34(8), 901-921.	Graham-Wisener, Hanna, Collins and Dempster	2019	Psychological adjustment in patients post-curative treatment for oesophageal cancer: a longitudinal interview study	Psychology & Health	Ireland	a longitudinal interview study (title) This study is the first to utilise a longitudinal qualitative desig (abstract)	In contrast to earlier research, this study will involve a sample of survivors for which less time has elapsed since treatment-end and will utilise a longitudinal qualitative design, recommended to suggest mechanisms involved in change during key transition periods by exploring how and why experiences change over time.	oesophageal cancer patients	beliefs participants hold regarding their condition and how these are appraised against their experience	suggest mechanisms involved in change during key transition periods by exploring how and why experiences change over time	Patients were recruited from an Oesophageal Patient’s Association meeting in Northern Ireland.	no		Phenomenology	Interpretative Phenomenological Analysis approach	Smith, J. A. (1996a). Evolving issues in qualitative psychology. In J. Richardson (Eds.), Handbook of qualitative research methods for psychology – The social sciences. Leicester, UK: The British Psychological Society. Smith, J. A. (1996b). Beyond the divide between cognition and discourse: Using interpretative phenomenological analysis in health psychology. Psychology and Health, 11, 261–271. do…	One	individual interviews	no	6 months	2	Serial interviews were undertaken with six oesophageal cancer patients who have recently completed curative treatment,at baseline and at 6-month follow-up.	6	6 interviews time point 1, 4 interviews time point 2 .................. The sample was composed of six oesophageal cancer patients (Table 1). Attrition was relatively high due to the period of recruitment being in the early post-treatment period, with two participants not undertaking the interview at the second time-point as a result of being too medically unwell.	Interpretative Phenomenological Analysis approach
Granbom, M., Taei, A., & Ekstam, L. (2017). Cohabitants' perspective on housing adaptations: A piece of the puzzle. Scandinavian Journal of Caring Sciences, 31(4), 805-813.	Granbom, Taei and Ekstam	2017	Cohabitants' perspective on housing adaptations: a piece of the puzzle	Scandinavian Journal of Caring Sciences	Sweden	The study has a qualitative descriptive and longitudinal design (methods)	The aim of this study was therefore to describe the cohabitants´ expectations and experiences of how a housing adaptation, intended for the partner, impacted on everyday life.	Cohabitants of persons applying for housing adaption (mostly older people)	describe cohabitants expectations and experiences	unclear	home-dwelling	yes	larger ongoing evaluation study regarding the housing adaptation process for older people and people with disabilities in Sweden	Grounded theory		Corbin J and Strauss A. Basics of qualitative research. Thousand Oaks: Sage, 2008. Saldana J. Longitudinal qualitative research - analyzing change through time. Walnut Creek: AltaMira Press, 2003.	One	A semi-structured interview guide was developed, based on the aim of the study, and was used at both interviews. For the follow-up interview the guide was revised based on preliminary analysis.	None	7 months (average)	2	The first interview with the cohabitants took place directly after the HA grant was applied for. The follow-up interview was made three months after the application was granted and installed. It was on average 7 months between the first interview and the follow-up interview.	9	18 interviews	Constant comparative method (Grounded Theory)
Graney, B. A., Wamboldt, F. S., Baird, S., Churney, T., Fier, K., Korn, M., McCormick, M., Vierzba, T., & Swigris, J. J. (2017). Looking ahead and behind at supplemental oxygen: A qualitative study of patients with pulmonary fibrosis. Heart & Lung, 46(5), 387-393.	Graney, FWamboldt, Baird, Churney, Fier, Korn, McCormick, Vierzba and Swigris	2017	Looking ahead and behind at supplemental oxygen: A qualitative study of patients with pulmonary fibrosis	Heart & Lung	US	longitudinal observational study (qualitative part of a mixed methods study)	In this study, we sought to better understand how patients with PF (pulmonary fibrosis) view and experience O2 e its benefits and challenges e at various stages of their illness. ….. Interviews were designed to gain appreciation for patients’ understanding of the process of when, why and how O2 was prescribed, and to examine their changing views of the benefits and challenges of O2 over time.	patients with PF of any etiology, greater than 18 years of age, not using O2 ....., were recruited to participate in a pre-/post-O2 study	understand how patients with PF view and experience O2 e its benefits and challenges e at various stages of their illness	at various stages of their illness the process of when, why and how O2 was prescribed to examine their changing views of the benefits and challenges of O2 over time.	home-dwelling	yes	enrolled in a longitudinal, observational study of the effects of O2 whose methods were published previously.5 Briefly, between August 2013 and October 2015, patients with PF of any etiology, greater than 18 years of age, not using O2 and able to speak and read English, were recruited to participate in a pre-/post- O2 study aimed at determining whether and how O2 affected symptoms, physical activ…	other	Longitudinal observational mixed methods design	Graneheim UH, Lundman B. Qualitative content analysis in nursing research: concepts, procedures and measures to achieve trustworthiness. Nurse Educ Today. 2004;24(2):105e112.	Several	structured telephone interviews , observations, questionnaires	yes	10-13 months	4	For the longitudinal study, data were collected at four time points: 1) enrollment; 2) 7-10 days prior to initiation of O2 (participants informed us when O2 was prescribed by their treating physicians, and data were conducted before use of O2 began); 3) one month after initiation of O2; and 4) 9-12 months after initiation of O2.	40 were enrolled- five were included	5X4 interviews=20	Content analysis
Grossman, J. M., Jenkins, L. J., & Richer, A. M., (2018). Parents' perspectives on family sexuality communication from middle school to high school. International Journal Of Environmental Research And Public Health, 15(1).	Grossman, Jenkins and Richer	2018	Parents' Perspectives on Family Sexuality Communication from Middle School to High School	International Journal Of Environmental Research And Public Health	US	In this longitudinal qualitative study, U.S. parents (N= 23) participated ininterviews when their teens were in early adolescence	The current study provides a unique longitudinal examination of parents’ perceptions of continuity and change in teen-parent communication from middle school tohigh school. The knowledge gained from this study will guide our understanding of how parents door do not adapt their approaches to sexuality communication to teens’ changing development andsexuality. It also explores the role of teen gend…	parents of adolescents from three schools that participated inan evaluation ofGet Real: Comprehensive Sex Education That Works, a three-year program developed byPlanned Parenthood League of Massachusetts.	parents' perceptions of continuity and change; parents communication with their adolescent children about sex and relationship	longitudinal examination -……….. of continuity and change	USA Massaachusetts - schools Get Real: Comprehensive Sex Education That Works, a three-year program school; three schools that participated in an evaluation of Get Real: Comprehensive Sex Education That Works	yes	a three year evaluation program of Get Real: Comprehensive Sex Education That Works	other	longitudinal qualitative study,	Braun, V.; Clarke, V. Using thematic analysis in psychology.Qual. Res. Psychol.2006,3, 77–101. [CrossRef] 33.Sandelowski, M. Theoretical saturation. InThe Sage Encyclopedia of Qualitative Research Methods; Given, L.,Ed.; SAGE: Thousand Oaks, CA, USA, 2008; pp. 875–876.34. Miles, M.B.; Huberman, A.M.Qualitative Data Analysis: An Expanded Sourcebook, 2nd ed.; SAGE: Thousand Oaks,CA, USA, 1994.	One	Only one parent in each family was interviewed. Given the focus of the current study on teen-parentcommunication, three participating guardians (great aunt, grandmother, older sister) were excludedfrom this analysis. Each parent completed a demographic questionnaire.	no	36 months	2	researchers interviewed participating parents twice: once when teens were in seventh grade and again when teenswere in tenth grade. …………………. All parents who provided consent were contacted for an interview; 94% of those (32 parents/guardians) completed interviews (Time 1). Only one parent in each family was interviewed. Given the focus of the current study on teen-parent communication, three part…	29	52 interviews lasting 30-45 min	Thematic analysis
Grylka-Baeschlin, S., Meyer, T., Lengler, L., van Teijlingen, E., Pehlke-Milde, J., & Gross, M. M. (2019). Postnatal quality of life — A content analysis of qualitative results to the Mother-Generated Index. Women & Birth, 32(2), e229-e237.	Grylka-Baeschlin, Meyer, Lengler, E. van Teijlingen, Pehlke-Milde and Gross	2019	Postnatal quality of life — A content analysis of qualitative results to the Mother-Generated Index	Women & Birth	Germany and Switzerland	Methods: Prospective, cross-cultural, longitudinal survey. We applied a qualitative content analysis to Mother-Generated Index data collected in Switzerland and Germany using combined deductively and inductively category building. (abstract)	The aims of this paper were therefore to investigate: (a) details and particularities of the are as of life affected after child birth and thus to identify specific domains and subdomains defining postnatal QoL; (b) changes in the importance of domains specifying QoL within the first weeks postpartum; and (c) the potential role of cultural differences with regard to the content of QoL definitions.	women in post natal care	postnatal quality of life	changes in the importance of domains	in two small rural hospitals, one in the south of Germany and the other in the north of Switzerland. The hospitals both had between 500 and 600 births per year and did not offer neonatal intensive care. The sites were situated in the same geographical area within five kilometers of the border.	yes	This paper presents the qualitative content analysis of the areas of life which were mentioned by German and Swiss mothers as being affected by having a baby by completing the MGIina prospective, cross-cultural, longitudinalsurvey. Translation and validation of the MGI 23 and its use for cross-cultural comparison 11 have been published else where.	other	qualitative content analysis	24. Forrest Keenan K, van Teijlingen E. The quality of qualitative research in family planning and reproductive health care. J Fam Plann Reprod Health Care 2004;30 (4):257–9. 25. Mayring P. Qualitative Inhaltsanalyse, Grundlagen und Techniken, 12. aktualisierte und u¨berarbeitet Ausgabe. 12th ed. Weinheim und Basel: Beltz-Verlag; 2015.	One	survey: For this qualitative content analysis, the first step of completing the MGI, where women wrote down the areas of life which were affected by the motherhood, was of interest(Fig.1). Women had between one and eight rows at their disposal to report the domains of their life in which they experienced important changes after giving birth. The text written in these rows constituted the study ma…	yes	1,5 months	2	first days after birth and six weeks postpartum	124	Data from 221 surveys	qualitative content analysis
Gulbas, L. E., Guz, S., Hausmann-Stabile, C., Szlyk, H. S., & Zayas, L. H. (2019). Trajectories of well-being among latina adolescents who attempt suicide: A longitudinal qualitative analysis. Qualitative Health Research, 29(12), 1766-1780.	Gulbas, Guz, Hausmann-Stabile, Szlyk and Zayas	2019	Trajectories of Well-Being Among Latina Adolescents Who Attempt Suicide: A Longitudinal Qualitative Analysis	Qualitative Health Research	US	A Longitudinal Qualitative Analysis (titel) ………. longitudinal, qualitative research design (abstract)	Research Question 1: How do trajectories of well-being vary among Latina teens after a suicide attempt? Research Question 2: What risk and protective fac-tors might contribute to different trajectories?	Latina teens after a suicide attempt	trajectories of well-being	trajectories	Latina teens living in predominantly low-income house-holds in New York City	yes	as part of their involvement in a large federally funded, mixed-method project to examine the influences of sociocultural process on the suicidal behaviors of Latina teens living in predominantly low-income house-holds in New York City.	other	qualitative longitudinal	Kaiser, K. (2009). Protecting respondent confidentiality in qualitative research. Qualitative Health Research, 19, 1632– 1641. doi:10.1177/1049732309350879 Fereday, J., & Muir-Cochrane, E. (2006). Demonstrating rigor using thematic analysis: A hybrid approach of inductive and deductive coding and theme development. International Journal of Qualitative Methods, 5, 80–92. doi:10.1177/16094069060050…	One	individual interviews		12 months	2	A total of 73 Latinas who attempted suicide participated in the qualitative phase of the large study. From this sample, 17 participants agreed to take part in a follow-up interview, which took place approximately 1 year following the baseline interviews.	17	34 interviews	thematic analysis both deductive and inductive
Guldager, R., Willis, K., Larsen, K., & Poulsen, I. (2019). Relatives' strategies in subacute brain injury rehabilitation: The warrior, the observer and the hesitant. Journal Of Clinical Nursing, 28(1), 289-299.	Guldager, Willis, Larsen and Poulsen	2019	Relatives' strategies in subacute brain injury rehabilitation: The warrior, the observer and the hesitant	Journal Of Clinical Nursing	Denmark	A longitudinal study with a qualitative approach (abstract)	The aim of this study was to undertake theoretical‐empirical analysis of relatives’ strategies and practices in the rehabilitation process as evident in meetings with providers. We explored the experience of the rehabilitation process from the perspectives of relatives of patients with a TBI. Our research question was “what kind of strategies do relatives of patients with a TBI apply and use in t…	relatives of patients with a TBI.	strategies and practices in the rehabilitation process as evident in meetings with providers	rehabilitation process	The study was conducted in a subacute 22 bed highly specialised rehabilitation department for patients with severe TBI at a university hospital in Denmark from November 2016–September 2017. The department is one of two centralised departments in Denmark.	no		other	longitudinal qualitative design	Bourdieu, P., & Accardo, A. (1999). The weight of the world: Social suffering in contemporary society. Cambridge, UK: Polity Press. Bourdieu, P., & Bennett, T. (2010). Distinction: A social critique of the judgement of taste. London, UK: Routledge. Polit, D. F., & Beck, C. T. (2014). Essentials of nursing research: Appraising evidence for nursing practice. (8th ed., international edition ed.) Phi…	Several	Observations and interviews: The observations were undertaken during the meetings which are considered as key elements of empirical focus because this is where decision‐making regarding rehabilitation takes place. The purpose of the meetings was to discuss the clinical assessment of the patient and the patient's likely prognosis, length of stay and later in the rehabilitation process, also the di…	no	unclear	2 or 3	unclear: The number of interviews with each relative varied from 2–3 depending on the length of the admission. …………… The meetings were followed up every 3 weeks until discharge.	11	Twenty‐two meetings were observed.	qualitative content analysis was undertaken of both observations and interviews (Graneheim & Lundman, 2004).
Hamblin, K. (2017). Telecare, obtrusiveness, acceptance and use: An empirical exploration. British Journal of Occupational Therapy, 80(2), 132-138.	Hamblin	2017	Telecare, obtrusiveness, acceptance and use: An empirical exploration	British Journal of Occupational Therapy	UK	qualitative, multi-method, longitudinal research study (abstract)	to examine the daily experiences of telecare. The research questions addressed in this paper are therefore: (1) whether Hensel et al.’s (2006) obtrusiveness framework is applicable empirically to the English context; and (2) what is the impact of the dimensions of obtrusiveness on the acceptance and use of telecare?	participants with memory problems and/or susceptibility to falls; were living in the community; were aged over 65 and were either ‘new’ or established telecare users.	examine the daily experiences of telecare	unclear	Community-dwelling	no		other	ethnographic observations, interviews photography, diary ÅA: The data analysed using Hensel et al.’s (2006) framework were collected during a study designed to examine the daily experiences of telecare. The methodology used – ‘Everyday Life Analysis’ (ELA) (Yeandle et al., 2014b) – included ethnographic observations and qualitative interviews supplemented by creative methods including photography…	No method references	Several	Observations Interviews Notebooks/Diaries Photographs	No	6-9 months	4 to 6	Participants were visited 4–6 times over 6–9 months in their own homes, with variation owing to the physical frailty or other demands on the participants’ time. This longitudinal aspect was key, allowing for the observation of changes in participants’ attitudes towards telecare over time, influenced not only by their use of the devices and their interactions with the services supporting them, but…	60	Not specified	data were coded using computer-aided techniques in accordance with a framework based on Hensel et al.’s (2006) model, with open coding to also allow for the inclusion of additional factors affecting the uptake and usage of telecare.
Hanrahan, F., & Banerjee, R. (2017). ‘It makes me feel alive’: The socio-motivational impact of drama and theatre on marginalised young people. Emotional & Behavioural Difficulties, 22(1), 35-49.	Hanrahan and Banerjee	2017	‘It makes me feel alive’: the socio-motivational impact of drama and theatre on marginalised young people	Emotional & Behavioural Difficulties	UK	Qualitative longitudinal design	We aimed to explore the participants’ experiences of long-term involvement in drama and theatre work from an idiographic, phenomenological perspective, and to consider the young people’s narratives in relation to the psychological mechanisms identified by our model of disaffection/ engagement.	Participants in the current study were four young people (three females; one male) who made up the participants of a drama and theatre project for young people who had experienced school exclusion.	explore the participants´ experiences of long term involvement	long-term involvement	drama theatre project had attended Pupil Referral Unit urban location in south-east England run by a charity company	no		Phenomenology	interpretative phenomenology	Burman, E. 1995. “Interviewing.” In Qualitative Methods in Psychology: A Research Guide, Eds. P. Banister, E. Burman, I. Parker, M. Taylor, and C. Tindall, 49–71. Buckingham: Open University Press. Smith, J. A. 2004. “Reflecting on the Development of Interpretative Phenomenological Analysis and Its Contribution to Qualitative Research in Psychology.” Qualitative Research in Psychology 1 (1): 39–5…	One	An interview schedule was developed which served as a framework for exploring the young people’s experiences of the theatre sessions and production. Questions covered the following topics: why and how the young people had come to be involved, their motivation for attending the sessions, their experience of the sessions/performances, their relationships with the theatre practitioners and other you…	Not descriebed	22 months	3	Each participant was interviewed by the first author (a white female researcher) at three time points over 22 months: first, when the young people were just beginning to attend theatre workshops; then following the young people’s first performance of the co-created theatre production; and finally, following a 3-week run of the production. Adaptations were made to the interview schedule at each ti…	4	12 interview	nterpretative phenomenological analysis (IPA)
Hansen, C. A., Abrahamsen, B., Konradsen, H., & Pedersen, B. D. (2017). Women's lived experiences of learning to live with osteoporosis: A longitudinal qualitative study. BMC Women's Health, 17(1), 17-17.	Hansen, Abrahamsen, Konradsen and Pedersen	2017	Women's lived experiences of learning to live with osteoporosis: a longitudinal qualitative study	BMC Women's Health	Denmark	Longitudinal qualitative study (title)	In the current study, we chose a qualitative method in order to supplement former studies of osteoporosis. This was chosen in order to explore the patient’s perspective of osteoporosis, and to detect areas where improvements in treatment could be made. The objective was to explore what characterizes women’s experiences of living with osteoporosis in the first year after diagnosis, when patients a…	women 65 years or older who attended DXA scan and diagnosed with osteoporosis	womens experiences of living with osteoporosis in the first year after diagnosis	experiences of living with osteoporosis in the first year after diagnosis	two hospitals in DK	no		Phenomenology	Riceurs phenomenology, described in a figure	Ricoeur P. Interpretation Theory: Discourse and the surplus of meaning. Fort Worth: Christian University Press; 1976. https://www.uni-trier.de/fileadmin/ fb1/prof/PHI/003/Bilddateien/Ricoeur_Interpretation_Theory.pdf. Lindseth A, Norberg A. A phenomenological hermeneutical method for researching lived experience. Scand J Caring Sci. 2004;18(2):145–53. doi:10. 1111/j.1471-6712.2004.00258.x. Herman…	One	The participants gave three interviews, for a total of 42 interviews for analysis. The first interview took place shortly after diagnosis, the second interview about six months later and the third interview approximately one year after diagnosis. An open approach was used to encourage the women to tell their individual stories of living with osteoporosis. An open interview guide (Additional file …	no	12 months	3	Data source: The participants gave three interviews, for a total of 42 interviews for analysis. The first interview took place shortly after diagnosis, the second interview about six months later and the third interview approximately one year after diagnosis. These points of time were chosen because studies have shown that patients’ medical adherence stabilizes around six months after initiation	15	42 interviews	Phenomenological-hermeneutic aproach (Ricoeur)
Hansen, F., Berntsen, G. K. R., & Salamonsen, A. (2018). "What matters to you?" A longitudinal qualitative study of Norwegian patients' perspectives on their pathways with colorectal cancer. International Journal of Qualitative Studies on Health And Well-Being, 13(1), 1548240-1548240.	Hansen, Berntsen and Salamonsen	2018	What matters to you? A longitudinal qualitative study of Norwegian patients' perspectives on their pathways with colorectal cancer	International Journal Of Qualitative Studies On Health And Well-Being	Norway	This research is based on a longitudinal qualitativeapproach, a method that“can add depth and under-standing to health care research, especially on topicssuch as chronic conditions, adherence and changinghealth policies”	We aim to offer rich descriptions of the participants’ lives lived with colorectal cancer and what they themselves emphasize as important. The research questions analysed in this article are: What is important for persons diagnosed with colorectal cancer during their patient pathways? And, based on these findings, which significant features do the patient pathways share?	they had to be between 18 and 70 years old, have been diagnosed with rectal cancer tumor-node-metastasis stage I–III (Dukes A–C) within the last 6 months, and have completed their primary surgical treatment.	transformation of care services to becomeperson centred	patient pathway	surgical ward/hospital northern Norway	no		other	longitudinal qualitativeapproach	Grossoehme, D., & Lipstein, E. (2016). Analyzing longitudinalqualitative data: The application of trajectory and recurrentcross-sectional approaches.BMC Research Notes,9, p 136. Hsieh, H.-F., & Shannon, S. E. (2005).Three approaches to qua-litative content analysis.Qualitative Health Research,15(9),1277.	Several	diaries, face-to-face and telephone interviews	no	12 months	4	two of the authors and a research assistant conducted baseline and quarterly qualitative interviews in 2011–2012. The participants were followed over a period of 1 year every 3 months.	10 the first time, then 9	46 interviews	inductive qualitative content analysisHsieh, H.-F., & Shannon, S. E. (2005). Three approaches to qualitative content analysis. Qualitative Health Research, 15(9), 1277.
Hansen, L., Rosenkranz, S. J., Wherity, K., & Sasaki, A. (2017). Living with hepatocellular carcinoma near the end of life: Family caregivers' perspectives. Oncology Nursing Forum, 44(5), 562-570.	Hansen, Rosenkranz, Wherity and Sasaki	2017	Living With Hepatocellular Carcinoma Near the End of Life: Family Caregivers' Perspectives	Oncology Nursing Forum	US	Longitudinal, qualitative descriptive design was used following this study of patients with Hepatocellular carcinoma (HCC) and their family caregivers	To explore family caregivers perspectives about caring for patients with terminal HCC (Hepatocellular carcinoma) as the patients apporached the end of life	Family caregivers of adult patients with a diagnosis of HCC	family caregivers´perspectives about caring for patients with terminal HCC	as the patients apporached the end of life	Hospital	yes	The pilot study design, procedures, data collection, and analysis methods have been described in detail elsewhere (Hansen, Dieckmann, Kolbeck, Naugler, & Chang, in press; Hansen, Rosenkranz, Vaccaro, & Chang, 2015). The quantitative component included survey data on symptoms in patients with terminal HCC (Hansen et al., in press).	other	A longitudinal, qualitative descriptive design	Hsieh, H.F., & Shannon, S.E. (2005). Three approaches to qualitative content analysis. Qualitative Health Research, 15, 1277–1288. doi:10.1177/1049732305276687 ……………. Sandelowski, M. (2000). Whatever happened to qualitative description? Research in Nursing and Health, 23, 334–340. doi:10.1002/1098-240X(200008)23:4<334::AID-NUR9>3.0.CO;2-G ............................ Sandelowski, M. (2010). What’…	One	Interviews were read by two teams members and codes were generated through inductive analysis of the data. The researchers met weekly to discuss coding discrepancies agree upon a codin shema, and develop a codebook	no	6 months	6	semistructured interviews conducted with family caregivers once a month during a six-month period.	13	78 interviews	conventional content analysis
Hanson, C. L., Oliver, E. J., Dodd-Reynolds, C. J., & Allin, L. J. (2019). How do participant experiences and characteristics influence engagement in exercise referral? A qualitative longitudinal study of a scheme in Northumberland, UK. BMJ Open, 9(2), e024370-e024370.	Hanson, Oliver, Dodd-Reynolds and Allin	2019	How do participant experiences and characteristics influence engagement in exercise referral? A qualitative longitudinal study of a scheme in Northumberland, UK	BMJ Open	UK	A qualitative longitudinal study (title)	This longitudinal qualitative study aimed to gain an insight into differential engagement through understanding participant experiences of an ERS. (exercise referral scheme)	participants in ERS program	experiences of an ERS. (exercise referral scheme)	unclear	The ERS received primary and secondary care referrals for those with cardiovascular disease, overweight/obesity, mental health issues, metabolic disease, and musculoskeletal, respiratory and neurological conditions. Previous analysis (n=2233) reported a significant increase in self-reported PA for those who adhered, with being aged ≥55 years a predictor of successful engagement. ................ …	yes	In the UK, leisure providers usually deliver ERSs, directing participants into 10–24 weeks of supervised PA. The present study focused on one large-scale ERS identified as emerging best practice by Public Health England.18	other	The study employed a longitudinal qualitative design	23. Tong A, Sainsbury P, Craig J. Consolidated criteria for reporting qualitative research (COREQ): a 32-item checklist for interviews and focus groups. Int J Qual Health Care 2007;19:349–57. 27. Marshall MN. Sampling for qualitative research. Fam Pract 1996;13:522–6. 28. Strauss AL. Qualitative analysis for social scientists. Cambridge: Cambridge University Press, 1987. 29. Spencer L, Ritchie J,…	One	individual interviews	no	3 to 5 months	2	During initial telephone contact, ERS staff informed referrals that the study consisted of two semistructured interviews about their ERS experience. The first was conducted prior to starting, and the second later in the 24-week period. ………………….. Initial interviews focused on circumstances leading to referral and perceptions of the ERS. Second interviews, which took place 12–20 weeks later, focuse…	15	15+11	thematic analysis
Harris, M. (2017). Managing expense and expectation in a treatment revolution: Problematizing prioritisation through an exploration of hepatitis C treatment 'benefit'. The International Journal of Drug Policy, 47, 161-168.	Harris	2017	Managing expense and expectation in a treatment revolution: Problematizing prioritisation through an exploration of hepatitis C treatment 'benefit'	The International Journal On Drug Policy	UK	Data are from a qualitative longitudinal study exploring treatment transitions	To explore participants’ narratives of HCV treatment expectation and map their anticipatory accounts to those of post treatment ‘benefit. At the end of the method chapter: This aim of this paper is to present analyses pertaining to participant treatment decision making, expectations and outcomes in a period of HCV biomedical transition and, through doing so, to explore the relevance and fit of co…	People living with HCV (hepatitis) and providers.	Treatment benefits	decision making, expectations and outcomes in a period of HCV biomedical transition	Two hospital and two liked drug treatment centers	no	Providers and stakeholders?	other	This paper draws on longitudinal qualitative data	Saldana, J. (2015). The coding manual for qualitative researchers. Los Angeles, New Dehli, London: Sage.	Several	The primary data generation methods were in-depth interviews with patients and providers and ethnographic observations in nurse-led HCV clinics. Observations explored the dynamics of patient-provider communication, information provision and treatment processes in situ, enabling triangulation through observing events also accounted in interviews.	no	18 months	Unclear	Participants with HCV were interviewed in person up to five times each, at approximately three month intervals up until 18 months’ post-treatment, dependent on treatment duration, outcome, and participant availability. Providers were interviewed once; resulting in a corpus of 84 interviews.	28	Among others……………. One hundred hours of clinic observations were conducted	Thematic analyses
Harris, M., & Rhodes, T. (2018). Caring and curing: Considering the effects of hepatitis C pharmaceuticalisation in relation to non-clinical treatment outcomes. The International Journal On Drug Policy, 60, 24-32.	Harris and Rhodes	2018	Caring and curing: Considering the effects of hepatitis C pharmaceuticalisation in relation to non-clinical treatment outcomes	The International Journal On Drug Policy	UK	a longitudinal qualitative study; treatment journey	non-clinical benefits. We consider the implications of simplified treatment provision in the eraof direct acting antivirals (DAAs) for the realisation of non-clinical benefits., how engagement in HCV care is giving meaning for patint and provider	patient (with hepatitis C), provider and systems perspective	An important question, therefore, is not only how the pharmaceuticalisation of HCV will change care provision, but how this might impact on the forms of patient citizenship and non-clinical outcomes realised.	change	two large HCV treatment hospitals and two linkeddrug treatment services in London nurse-led HCV clinic	no		Ethnography	The primary data generation methods were ethnographic observations in nurse-led HCV clinics and in-depth interviews with patients and providers.	Seale, C. (1999).The quality of qualitative research.London: Sage.	Several	HCV clinicobservations and in-depth interviews with patients and providers cap-ture this period of treatment transition. The primary data generation methods were ethnographic observa-tions in nurse-led HCV clinics and in-depth interviews with patients and providers	no	39 months	patients= 5 times each, providers =1 time, + Several observations	In the first eighteen months of data generation, the lead author (MH) sat in on 100 h of nurse-led HCV clinics at the two hospital sites, interacting with patients and providers. Field-notes were made of observations and conversations, with a focus on recording acts, interactions and processes	38 (28 patients and 10 providers)	84 interviews lasting 90-120 minutes and 100 h of observtions	Tematic coding
Harvey, D., Foster, M., Quigley, R., & Strivens, E. (2018). Care transition types across acute, sub-acute and primary care. Journal of Integrated Care, 26(3), 189-198.	Harvey, Foster, Quigley and Striver	2018	Care transition types across acute, sub-acute and primary care	Journal of Integrated Care	Australia	a longitudinal case study design was used	The purpose of this analysis is to distil the types and commonalities of care transitions of older people by examining the individual experiences of older people, and their carers, who transitioned from community through acute and sub-acute care to home as a case study of transition.	older people and their carers	care transitions	Transition	The study was conducted in regional Australia within a 531-bed public hospital withan Older Persons Evaluation Rehabilitation and Assessment (OPERA) unit which utilises190JICA26,3 the GEM model of care.	yes	The purpose of this analysis is to distil the types and commonalities of care transitions of older people by examining the individual experiences of older people, and their carers, who transitioned from community through acute and sub-acute care to home as a case study of transition. Through this approach, a more nuanced understanding of care transitions as both a series of discrete transitions a…	Case study	A qualitative case study design was used, which is ideally suited to in-depth investigation ofcomplex social issues	Yin, R.K. (2014),Case Study Research: Design and Methods, 2nd ed., Sage, Beverley Hills, CA. Baxter, P. and Jack, S. (2008),“Qualitative case study methodology: study design and implementationfor novice researchers”,The Qualitative Report, Vol. 13 No. 4, pp. 544-559 Creswell, J. (1998),Qualitative Inquiry and Research Design: Choosing among Five Traditions, Sage,Thousand Oaks, CA Baxter, P. and J…	Several	semi-structured interviews and service use data from medical records	no	1 months	2	Each transition case study involved semi-structured interviews with the older person on admission to the OPERA ward, before discharge and one month after discharge; and semi-structured interviews with the carer, before and one month after discharge.	19	In total, 93 interviews were conducted, 56 with patients and 37 with carers. The majority of interviews were conducted face to face (n¼89). Post-discharge interviews were conducted at a participant’s home, workplace or at the hospital. Interviews were recorded, transcribed and stored for analysis using NVivo version 9 (QSR International) software. Function and service use data were collected by a…	Integrated analysis
Harvey, D., Foster, M., Strivens, E., & Quigley, R. (2017). Improving care coordination for community-dwelling older Australians: A longitudinal qualitative study. Australian Health Review, 41(2), 144-150.	Harvey, Foster, Strivens and Quigley	2017	Improving care coordination for community-dwelling older Australians: a longitudinal qualitative study	Australian Health Review	Australia	An exploratory, longitudinal case study design	To (1) describe care transition experiences from multiple perspectives and identify personal, systemic and local factors affecting these experiences; and (2) identify applied solutions that could be used to enhance implementation and capacity of the GEM model.	Patients, carers and service providers.	Care coordination	Transition	Hospital	no		Case study		Ritchie J, Spencer L, O’Connor W. Carrying out qualitative analysis. In Ritchie J, Lewis J, editors. Qualitative research practice: a guide for social science students and researchers. ThousandOaks, CA: Sage; 2011. pp. 219–62.	Several	interviews and focus groups	yes	Unclear	3	Patients were interviewed on admission to the OPERA ward, before discharge and 1 month after discharge. Carers were interviewed before discharge and 1 month after discharge.	39	97 semistructured interviews	A within and across-case analysis of patietns and carer interviews, and thematic analysis of focus groups data.
Harvey-Lloyd, J. M., Morris, J., & Stew, G. (2019). Being a newly qualified diagnostic radiographer: Learning to fly in the face of reality. Radiography, 25(3), e63-e67.	Harvey-Lloyd, Morris and Stew	2019	Being a newly qualified diagnostic radiographer: Learning to fly in the face of reality	Radiography	UK	A longitudinal study was utilised employing an interpretive phenomenological methodology	This study explored the experience of transition from student to practitioner in diagnostic radiography and in particular focused on being and becoming a radiographer.	students in radiography	the experience of transition from student to practitioner in diagnostic radiography	from student to practitioner ………. Becoming				Phenomenology	A longitudinal, qualitative prospective study was utilised adopting an interpretive phenomenological methodology.18	18. Cohen L, Manion L, Morrison K. Research methods in education. 5th ed. London: Routledge Farmer; 2000. 19. Smith JA, Osborn M. Interpretive phenomenological analysis. In: Smith JA, editor. Qualitative psychology. A practical guide to research methods. 2nd ed. London: Sage; 2016. 20. Wiercinksi A. Hans-Georg Gadamer and the truth of hermeneutic experience. Anal Hermeneut 2009;1:3e14. 21. Densco…	One	In order to maximise the effectiveness of the interviews as the primary data collection method, two associated data collection tools were used at two different time intervals in order to complement and inform the semi-structured interviews. These were a peaks and troughs graph adapted by Bourner et al. and a theme board.29,30 A theme board consists of a selection of images, which have been chosen…	no	12 months	3	Three interviews were undertaken with each participant; at three months, six months and twelve months post qualification. These time intervals were chosen for the following reasons: The first three months as a new practitioner has been pinpointed as a crucial time as they are required to ‘hit the floor running’ and to adapt quickly to a new, dynamic working environment.2 It is therefore essential…	9	Twenty seven semi-structured interviews were undertaken	thematic analysis
Hatcher, A. M., Hofstedler, E. L., Doria, K., Dworkin, S. L., Weke, E., Conroy, A., Bukusi, E. A., Cohen, C. R., & Weiser, S. D. (first published 2019). Mechanisms and perceived mental health changes after a livelihood intervention for HIV-positive Kenyans: Longitudinal, qualitative findings. Transcultural Psychiatry, 2000, 57(1) 124–139.	Hatcher, Hofstedler, Doria, Dworkin, Weke, Conroy, Bukusi, Cohen and Weiser	2019	Mechanisms and perceived mental health changes after a livelihood intervention for HIV-positive Kenyans: Longitudinal, qualitative findings	Transcultural Psychiatry	Kenya	Longitudinal, qualitative findings (titel) …………. We integrated longitudinal, qualitative research into a randomized trial (abstract)	We examined how a multi-sectoral livelihood intervention affected mental health for HIVpositive farmers in Kenya. Using qualitative methodology, we explored participant definitions of mental health, perceived changes in mental health due to the intervention, and mechanisms through which the intervention may have influenced mental health outcomes.	HIVpositive farmers in Kenya	definitions of mental health, perceived changes in mental health	perceived changes	The study was conducted in Migori County in the former Nyanza region of Kenya where the vast majority of individuals are food insecure (Kenya National Bureau of Statistics, 2008). This region has the highest HIV prevalence in Kenya, at 15.1% (Kenya National Bureau of Statistics and ICF Macro, 2010), and is a region that has a high burden of depression (Ngui, Khasakhala, Ndetei, & Roberts, 2010). …	yes	In brief, we conducted a pilot randomized controlled trial in two communities to explore whether Shamba Maisha improved food security and HIV clinical outcomes among farmers	other	We integrated a longitudinal qualitative study into the pilot trial, aiming to unpack the mechanisms behind intervention impacts	Bernard, H. (2006). Research Methods in Anthropology: Qualitative and Quantitative Approaches (4th ed.). Lanham, MD: AltaMira Press. Patton, M. (2002). Qualitative Research and Evaluation Methods (3rd ed.). Thousand Oaks, CA: Sage Publications. Charmaz, K. (2008). Constructionism and the grounded theory method. In J. A. Hostein & J. F. Gubrium (Eds.) Handbook ofconstructionist research, 397–412. …	One	The interview guides at baseline aimed to elicit feedback about particular topics in the daily lives of participants, such as household composition, food, healthcare, partner dynamics, and farming decisions. To explore mental health, participants were asked about whether they had felt down, anxious, or sad and what causes sadness or stress in their lives. Follow-up interviews with the same partic…	no	12 months	3 for intervention participants, 2 for control group	We interviewed a purposive sample of intervention participants (n 45) and a subset of control participants (n 9) with the aim to recruit a wide range of ages, …………… A subset of 31 intervention participants were followed longitudinally, with one interview early in the intervention (at 3 to 5 months after enrollment) and a second at intervention end (12 months after the start of the intervention). …	45 and 9	85 in-depth interviews were conducted	not named
Henderson, G. E., Waltz, M., Meagher, K., Cadigan, R. J., Jupimai, T., Isaacson, S., Ormsby, N. Q., Colby, D. J., Kroon, E., Phanuphak, N., Ananworanich, J., Peay, H. L. (2019). Going off antiretroviral treatment in a closely monitored HIV "cure" trial: Longitudinal assessments of acutely diagnosed trial participants and decliners. Journal of the International AIDS Society, 22(3), e25260-e25260.	Henderson, Waltz, Meagher, Cadigan, Jupimai, Isaacson, Ormsby, Colby, Kroon, Phanuphak, Ananworanich and Peay	2019	Going off antiretroviral treatment in a closely monitored HIV "cure" trial: longitudinal assessments of acutely diagnosed trial participants and decliners	Journal Of The International AIDS Society	Thailand	Using longitudinal semi-structured interviews (abstract)	We aim to understand motivations to join or decline and whether, how, and why decision satisfaction may change over time [2,3].	people with HIV in ART trails	motivations to join or decline a trail	why decision satisfaction may change over time	In 2009, the South East Asia Research Collaboration in HIV (SEARCH) at the Thai Red Cross AIDS Research Centre began diagnosing and treating individuals with acute HIV infection [1], and inviting them to join SEARCH upon diagnosis.	yes	SEARCH 010 is a long-term cohort study with frequent clinical follow-up, antiretroviral treatment (ART) provision per US and Thai treatment guidelines and psychosocial support. The cohort now numbers over 500 participants, who may be recruited to sub-studies that include HIV remission trials. In 2016, our decision-making study (DMS) initiated with longitudinal interviews and questionnaires collec…	other	not described	13. Hsieh HF, Shannon SE. Three approaches to qualitative content analysis. Qual Health Res. 2005;15(9):1277–88. 14. Murray SA, Kendall M, Carduff E, Worth A, Harris FM, Lloyd A, et al. Use of serial qualitative interviews to understand patients’ evolving experiences and needs. BMJ. 2009;339:b3702. 15. Grossoehme D, Lipstein E. Analyzing longitudinal qualitative data: the application of trajector…	Several	Interviews began with completing the Decisional Conflict Scale [11]. This validated scale measures certainty in decision making, incorporating feeling informed, clarity and support in decision making, and satisfaction with the choice…….. The first interview explored experiences with HIV diagnosis, trial expectations, trial decision making and advice to others considering a similar trial. Particip…	yes	3 to 4 months	3 participants in trail, 2 decliners in trail	DMS RV411 trial participants were interviewed three times: (1) within five days of enrolment, (2) four weeks after ATI or as soon as viral rebound occurred and (3) at the trial’s conclusion, 3 to 4 months after the last participant went back on ART. Decliners were interviewed twice: (1) within five days of declining, and (2) after the trial concluded.	8 participants 6 trail decliners	calculated: 36 interviews	Conventional context analysis
Hill, C., Knafl, K. A., Docherty, S., & Santacroce, S. J. (2019). Parent perceptions of the impact of the Paediatric Intensive Care environment on delivery of family-centred care. Intensive & Critical Care Nursing, 50, 88-94.	Hill, Knafl, Docherty and Santacroc	2019	Parent perceptions of the impact of the Paediatric Intensive Care environment on delivery of family-centred care	Intensive & Critical Care Nursing	US	A qualitative descriptive design utilizing secondary analysis from a longitudinal study. (abstract) …………… A longitudinal mixed-methods case-study design was used to examine the trajectory of parental decision making for infants with complex lifethreatening conditions. (metods describes parent study)	We conducted a secondary analysis of data from a longitudinal study of parent involvement in decision-making in an intensive care environment to further elaborate the role of the physical and cultural environment in parent perception of the delivery of FCC.	parents to an infant in ICU	parent involvement in decision-making	unclear	major academic children’s hospital in the Southeastern United States. This PICU environment was one with few private rooms which were reserved for children requiring isolation. The majority of the infants were cared for in a large, open area that contained 6– 8 bed spaces with retractable curtains present between each bed space for limited privacy.		The primary study (R01NR010548, P.I. Docherty) from which the data for this secondary analysis was obtained took place in a major academic children’s hospital in the Southeastern United States. ……………… A longitudinal mixed-methods case-study design was used to examine the trajectory of parental decision making for infants with complex lifethreatening conditions. Parent enrollment in the primary st…	Case study	secondary analysis of case study	Hennink, M., Kaiser, B., Marconi, V., 2017. Code saturation versus meaning saturation: how many interviews are enough? Qual. Health Res. 27, 591–608. https://doi.org/10.1177/1049732316665344. Hsieh, H., Shannon, S., 2005. Three approaches to qualitative content analysis. Qual. Health Res. 15, 1277–1288. https://doi.org/10.1177/1049732305276687. Miles, M., Huberman, A., Saldana, J., 2014. Qualitat…	One	Interviews. Not described if parents were interviewed alone or together	no	12 months, and 12 months after death for parents who lost their child	12 at least for infants surviving their first year (monthly and at major events). Parents who infants died were followed up at 6 and 12 months after death.	The first case infant (C1) was a female of minority race/ethnicity with a prenatal diagnosis who spent approximately 150 days in the PICU. The second infant (C2) was a non-minority female with a post-natal diagnosis who spent approximately 300 days in the PICU, while the third infant (C3) was a non-minority male with a pre-natal diagnosis who was hospitalised in the PICU for just under a month. .…	6	The authors determined that saturation was achieved after completing the analysis of data from three cases (61 interviews, approximately 1500 pages of data). Each case contained an infant with a complex congenital heart anomaly and as a matter of chance, a married mother and father in their 30’s.	directed content analysis
Hoag, J., Igler, E., Karst, J., Bingen, K., & Kupst, M. J. (2019). Decision-making, knowledge, and psychosocial outcomes in pediatric siblings identified to donate hematopoietic stem cells. Journal of Psychosocial Oncology, 37(3), 367-382.	Hoag, Igler, Karst, K. Bingen and Kupst	2019	Decision-making, knowledge, and psychosocial outcomes in pediatric siblings identified to donate hematopoietic stem cells	Journal of Psychosocial Oncology	US	This prospective, longitudinal study used a mixed-methods assessment to better understand the experience of sibling donors. (discussion)	The current study was conducted to (1) describe the decision-making experience and psychosocial outcome of sibling donors utilizing a mixed-methods approach, and (2) determine the feasibility of completing a prospective and longitudinal assessment of sibling donors at a single institution.	sibling donors of Hematopoietic stem cell (aged 9–21 years)	decision-making experience and psychosocial outcome	determine the feasibility ofcompleting a prospective and longitudinal assessment of sibling donors at a single institution	Participants were recruited from a Midwestern Blood and Marrow Transplant program. As standard practice of the clinic, matched siblings complete a medical work-up and a psychological evaluation prior to donation.	no		other	mixed methods	inga kvalitativa, metodreferences only measurement papers	Several	At each time point, participants were asked to complete a semi-structured interview along with various psychological measures. Time 1 interviews were conducted in-person while subsequent interviews were conducted by telephone.	yes	6 months (between timepoint two and three, not mentioned in comparision to time-point one)	3	This study assessed donors at three time points: pre-donation decision-making, harvest procedure recovery, and six months post-donation. The latter was chosen to reflect a time when most recipients are home following their transplant hospitalization but may have ongoing health complications that impact donor coping.	12 (Three participants did not proceed to donation and completed only the first time point of the study.)	All 12 approached donors consented to the study; one donor was lost to follow-up at Time 2 but returned for Time 3, while another donor was lost to follow-up for Time 3. Variable response rates for interviews and questionnaires were achieved across the three time points (Time 1¼83.3–100%; Time 2¼87.5–100%; Time 3¼62.5–100%).	not named
Hodson, T., Gustafsson, L., & Cornwell, P. (2019). "Just got to live life as it comes": A case study of the spousal-dyad longitudinal mild stroke transitional experience. Brain Injury, 33(9), 1200-1207.	Hodson, Gustafsson and Cornwell	2019	Just got to live life as it comes: A case study of the spousal-dyad longitudinal mild stroke transitional experience	Brain Injury	Australia	This study aimed to longitudinally explore the essence of transitioning from…. (method/aim)	Consequently, the aim of this study was to provide an in-depth exploration of the mild stroke experience of one couple who received a novel health service within the Australian context. Specifically, this research examined the experience of transitioning from acute hospital care to the community following a mild stroke, for a spousal dyad in the first 9-months post-hospital discharge.	patient and spouse following a mild stroke	the experience of transitioning from acute hospital care to the community following a mild stroke	transition	The selected participants were from a large Australian capital city and received the intervention of the RCT.	yes	This research program was guided by a tiered approached outlined by Smith and colleagues, with the initial study suggested to be a case study (13), therefore forming the basis ofthe current study. The studies that follow this one, incorporate more participants and take a broader view of the phenomenon, whilst the current study focuses on a more detailed, intricate exploration. The study was embed…	other	A case study approach, using an Interpretative Phenomenological Analysis (IPA)	13. Smith JA, Flowers P, Larkin M. Interpretative phenomenological analysis: theory, method and research. London (UK): SAGE Publications Ltd; 2009. p. 225. 14. Hsieh H-F, Shannon SE. Three approaches to qualitative content analysis. Qual Health Res. 2005;15:1277–88. DOI:10.1177/ 1049732305276687. 18. Finlay L. Phenomenology for therapists: researching the lived world. Chichester, West Sussex: Wil…	One	Each of the participants were interviewed separately to allow for openness in communication. The same interview guide was used at each interview time-point; however, each subsequent interview began with a reflection from the previous one, as a form of member checking, to ensure interpretations were in line with participants’ thoughts.	no	9 months	4	Semi-structured interviews were completed at approximately 1-, 3-, 6- and 9- months post hospital discharge	2	8 interviews	Interpretative Phenomenological Analysis (IPA)
Hopia, H., Miettinen, S., Miettinen, M., & Heino-Tolonen, T. (2019). The voice of paediatric oncology nurses: A longitudinal diary study of professional development. European Journal of Oncology Nursing, 42, 28-35.	Hopia, Miettinen, Miettinen and Heino-Tolonen	2019	The voice of paediatric oncology nurses: A longitudinal diary study of professional development	European Journal Of Oncology Nursing	Finland	A longitudinal diary study (title) ……….. The study adopted a qualitative, longitudinal approach (methods)	The purpose of this paper is to describe how nurses perceive their professional development in paediatric oncology nursing by answering the question regarding the factors associated with professional development during the two-year training period. The rationale was that a deeper insight into the various aspects of professional development in paediatric oncology nursing from the nurses’ perspecti…	nurses	professional development in paediatric oncology nursing	professional development	paediatric oncology nurses (n=17) who participated in the two-year continuing professional education programme that was arranged to be completed while maintaining an employment relationship.			other	The study adopted a qualitative, longitudinal approach	Elo, S., Kyngas, H., 2008. The qualitative content analysis process. J. Adv. Nurs. 62 (1), 107–115 doi:io.nn/j.1365-2648.2007.04569.x.	One	Electronic written diaries were selected for optimal data collection, and the data were collected from September 2016 until April 2018, altogether 20 months. In total, 304 pages of diaries with 1.5-line spacing and a 12-font comprised the data.	no	20 months	not applicable	Electronic written diaries were selected for optimal data collection, and the data were collected from September 2016 until April 2018, altogether 20 months. In total, 304 pages of diaries with 1.5-line spacing and a 12-font comprised the data.	17	304 pages of text	inductive content analysis
Horter, S., Bernays, S., Thabede, Z., Dlamini, V., Kerschberger, B., Pasipamire, M., Rusch, B., & Wringe, A. (2019). "I don't want them to know": How stigma creates dilemmas for engagement with Treat-all HIV care for people living with HIV in Eswatini. African Journal of AIDS Research, 18(1), 27-37.	Horter, Bernays, Thabede, Dlamini, Kerschberger, Pasipamire, Rusch and Wringe	2019	I don't want them to know: how stigma creates dilemmas for engagement with Treat-all HIV care for people living with HIV in Eswatini	African Journal Of AIDS Research	Eswatini	This longitudinal research (abstract) ……………. a longitudinal qualitative design (methods)	we aim to examine how stigma shapes people living with HIV experiences with HIV, and engaging with HIV treatment and care services under Treat-all in Shiselweni, Eswatini (formerly Swaziland).	people living with HIV	experiences of with HIV, and engaging with HIV treatment and care services	shapes	In October 2014, a Ministry of Health/Médecins Sans Frontières (MoH/MSF) Treat-all implementation pilot began in the predominantly rural Nhlangano health cluster in the Shiselweni region. This aimed to contribute towards reduced HIV incidence and improved clinical outcomes for PLHIV. The population in Nhlangano largely access HIV treatment and care at primary health clinics. The area has eight pr…	yes	This study is situated within the context of a broader research project that used a longitudinal qualitative design to examine the lived experiences of clinically asymptomatic PLHIV, their engagement with HIV treatment and care, and how these changed over time in the context of Treat-all in Shiselweni, Eswatini. The study of lived experiences refers to understanding individuals’ experiences, choi…	other	qualitative design	Given, L. (Ed.). (2008). The SAGE encyclopedia of qualitative research methods. London: SAGE. Retrieved from https://doi. org/10.4135/9781412963909 Smith, J. A. (2004). Reflecting on the development of interpretative phenomenological analysis and its contribution to qualitative research in psychology. Qualitative Research in Psychology, 1, 39–54. https://doi.org/10.1191/1478088704qp004oa Liamputt…	One	In-depth interviews were conducted to explore a range of topics relating to PLHIV’s lives, their experiences of living with HIV, and with treatment and care	no	unclear up to 12 months	2 to 4 interviews people with HIV, 1 interview HCP	Identified PLHIV were contacted in June 2016 and invited to participate in between 2 and 4 interviews over a 12-month period, while healthcare workers (HCW) were invited to participate in 1 interview during March and April 2017.	30 people with HIV	106 interviews were conducted between August 2016 and September 2017, including 86 interviews with 30 PLHIV (Tables 1 and 2) and 20 interviews with HCW (Table 1)	drawing on principles of grounded theory
Horter, S., Wringe, A., Thabede, Z., Dlamini, V., Kerschberger, B., Pasipamire, M., Lukhele, N., Rusch, B., & Seeley, J. (2019). "Is it making any difference?" A qualitative study examining the treatment-taking experiences of asymptomatic people living with HIV in the context of Treat-all in Eswatini. Journal of The International AIDS Society, 22(1), e25220-e25220.	Horter, Wringe, Thabede, Dlamini, Kerschberger, Pasipamire, Lukhele, Azo Rusch and Seeley	2019	Is it making any difference? A qualitative study examining the treatment-taking experiences of asymptomatic people living with HIV in the context of Treat-all in Eswatini	Journal Of The International AIDS Society	Eswatini	A longitudinal qualitative study (abstract)	We examine asymptomatic PLHIV’s experiences engaging with Treat-all care in the Kingdom of Eswatini (formerly named Swaziland), including how treatment-taking is navigated and motivated over the longer term (at least 12 months after initiation).	people with HIV and health care providers	how treatment-taking is navigated and motivated over the longer term	how treatment-taking is navigated and motivated over the longer term	The Treat-all pilot project was implemented in the predominantly rural Nhlangano health zone, with eight primary healthcare clinics (largely rural, offering integrated HIV services) and one secondary health facility (urban, offering HIV care within a specific HIV-related care department or as part of antenatal care).	yes	This paper draws on data that were collected between August 2016 and September 2017, within a longitudinal qualitative study on the experiences of asymptomatic PLHIV enrolled in chronic HIV care under the Treat-all policy in Eswatini.	other	longitudinal qualitative study	31. O’Reilly M, Parker N. “Unsatisfactory Saturation”: a critical exploration of the notion of saturated sample sizes in qualitative research. Qual Res. 2013;13 (2):190–7. 32. Bradley EH, Curry LA, Devers KJ. Qualitative data analysis for health services research: developing taxonomy, themes, and theory. Health Serv Res. 2007;42(4):1758–72. 33. Glaser BG. The future of grounded theory. Qual Healt…	Several	Repeat in-depth interviews with PLHIV participants aimed to gain insight into changes in participants’ accounts of their experiences with Treat-all over time, and to build trust and rapport between interviewer and interviewee, enabling access to alternative layers of participants’ narratives beyond those participants may deem to be socially desirable. .............. detailed field notes for each …	no	8 months (on avarage)	4 to 2 times (mostly 3)	Selecting those enrolled to Treat-all from October 2014 to June 2015 from the sample, seventeen PLHIV participants were eligible for inclusion in this analysis, including nine women and eight men, with fifteen interviewed three times, one interviewed four times and one interviewed twice. PLHIV participants had been on ART for a mean of twenty months at the time of the first interview, and there w…	17 people with HIV, 20 HCP	fifteen interviewed three times, one interviewed four times and one interviewed twice, and 20 HCP interviews	drawing upon principles of grounded theory
Horwood, C., Jama, N. A., Haskins, L., Coutsoudis, A., & Spies, L. (2019). A qualitative study exploring infant feeding decision-making between birth and 6 months among HIV-positive mothers. Maternal & Child Nutrition, 15(2), e12726-e12726.	Horwood, Jama, Haskins, Coutsoudis and Spies	2019	A qualitative study exploring infant feeding decision-making between birth and 6 months among HIV-positive mothers	Maternal & Child Nutrition	South Africa	A qualitative longitudinal cohort design (abstract) ……… a longitudinal qualitative design (methods)	This paper presents results from a study to explore infant feeding practices among HIVpositive women and identify key role players influencing their infant feeding decisions. ……………. This study adopted a longitudinal qualitative design to prospectively capture critical moments and processes involved in infant feeding choices made by HIV‐infected women over the period from birth to 6 months. This m…	HIVpositive mothers to infants	infant feeding practices and identify key role players influencing their infant feeding decisions	to prospectively capture critical moments and processes involved …….. over the period from birth to 6 months	The study was conducted in one urban and one rural setting in KZN, South Africa. The rural site was a district in northern KZN with a population of 120,000, with high rates of illiteracy, poverty, and malnutrition, where 44.1% of pregnant women were HIV‐infected in 2013 (South Africa National Department of Health, 2013a). ............ is mainly African, most of whom speak isiZulu and live in scat…	no		other	Longitudinal qualitative design	Calman, L., Brunton, L., & Molassiotis, A. (2013). Developing longitudinal qualitative designs: Lessons learned and recommendations for health services research. BMC Medical Research Methodology, 13, 14. https:// doi.org/10.1186/1471‐2288‐13‐14 Gale, N. K., Heath, G., Cameron, E., Rashid, S., & Redwood, S. (2013). Using the framework method for the analysis of qualitative data in multidisciplinar…	One	An in‐depth interview guide was developed to explore three main topics, current feeding practices, reasons for adopting particular feeding practices, and people involved in making infant feeding decisions.	no	6 months after birth and one interview before)	7	The first visit was conducted before delivery to complete recruitment, obtain consent, and collect demographic data and data about intended feeding practices. After delivery, women were interviewed every month for 6 months, starting within 2 weeks of the baby's birth. Interviews were conducted in the participant's home,	11	61 interviews	Framework analysis
Jama, N. A., Wilford, A., Haskins, L., Coutsoudis, A., Spies, L., & Horwood, C. (2018). Autonomy and infant feeding decision-making among teenage mothers in a rural and urban setting in KwaZulu-Natal, South Africa. BMC Pregnancy and Childbirth, 18(1), 52-52.	Jama, Wilford, Haskins, Coutsoudis, Spies and Horwood	2018	Autonomy and infant feeding decision-making among teenage mothers in a rural and urban setting in KwaZulu-Natal, South Africa	BMC Pregnancy And Childbirth	South Africa	This study adopted a qualitative longitudinal design.	explore teenage mothers' narrativers about infant feeding choices and practices from birth to 6 months	Women aged 15 years or older who were more than36 weeks pregnant	autonomy and infant feeding decisions amongst teenagemothers	from birth to 6 months	KwaZulu-Natal - South africa, urban and one rural site -community, participants selected in partnership withthe KZN Department of Health. V one urban and one rural site	no		other	qualitative prospective study	17. Calman L, Brunton L, Molassiotis A. Developing longitudinal qualitative designs: lessons learned and recommendations for health services research. BMC Med Res Methodol. 2013;13:14. 24. Ritchie J, Spencer L. Qualitative data analysis for applied policy research. Qual Res Companion. 2002;573(2002):305–29. 25. Gale NK, Heath G, Cameron E, Rashid S, Redwood S. Using the framework method for the a…	One	in-depth interview guidewas used to explore three main topics;	no	6 months	6	Baseline data (demographic) and monthly in-depth-interviews in the participants’home for period of 6 months (total six interviews per participant).	10	60	framework analysis was used.
Jama, N. A., Wilford, A., Masango, Z., Haskins, L., Coutsoudis, A., Spies, L., & Horwood, C. (2017). Enablers and barriers to success among mothers planning to exclusively breastfeed for six months: A qualitative prospective cohort study in KwaZulu-Natal, South Africa. International Breastfeeding Journal, 12, 1-13.	Jama, Wilford, Masango, Haskins, Coutsoudis, Spies and Harwood	2017	Enablers and barriers to success among mothers planning to exclusively breastfeed for six months: a qualitative prospective cohort study in KwaZulu-Natal, South Africa	International Breastfeeding Journal	South Africa	A longitudinal qualitative design	We report the findings of a longitudinal cohort study, conducted among mothers who planned to exclusively breastfeed their infants for six months, and describe the factors that facilitated or acted as barriers to achieving their goal.	Women aged 15 years or older who were more than 36 weeks pregnant	to explore enablers or barriers to success among mothers who planned to exclusively breastfeed their infants	who planned to exclusively breastfeed their infants for six months …….. facilitated or acted as barriers to achieving their goal.	The study was carried out in two sites in KwaZulu-Natal, a deep rural site in northern KZN and an urban are in Durban	no		other	a longitudinal qualitative design	Calman I, Brunton L, Molassiotis A. Developing longitudinal qualitative designs:lessons learned and recommendations for health services research. BMC Med Res Methodol. 2013;13:14. 18. ......................... Gale NK, Heath G, Cameron E, Rashid S, Redwood S. Using the framework method for the analysis of qualitative data in multi-disciplinary health research. BMC Med Res Methodol. 2013;13:117. .…	One	face-to-face in-depth interviews	yes	6 months	6	The mothers were interviewed monthly for six months postpartum. Interviews were conducted between November 2015 and October 2016.	22	125 in-depth interviews	The framework method
Janeiro, L. d. B., Ribeiro, E. M., & Lopez Miguel, M. J. (2018). What is inside the “black box”? Therapeutic community residents’ perspectives on each treatment phase. Addiction Research & Theory, 26(4), 294-305.	Janeiro, Ribeiro and Lopez Miguel	2018	What is inside the “black box”? Therapeutic community residents’ perspectives on each treatment phase	Addiction Research & Theory	Portugal	We used a longitudinal and prospective research design	This study aims to describe residents’perspectives on change through each of the three treatmentphases The TC residents’perspectives on their change can contribute towards an understanding of this process of change. More specifically, we aimed to show how the residents perceived the contextual conditionsof treatment during each phase, how they related to the perceived treatment and which outcomes…	residents of therapeutic community - drug addiction	understanding of this process of change in this treatment	change	Participants were undergoing treatment in a therapeutic community based on the hierarchical model and the treatment lasted for 18 months,	no		Grounded theory		Strauss JL, Corbin J. 1998. Basics of qualitative research: Techniques andprocedures for developing grounded theory (2nd ed.). London: Sage. Glaser BG, Strauss AL. 1999. Discovery of Grounded Theory: Strategies for qualitative research. New York: Aldine de Gruyter.	Several	interviews	yes Helpful Aspects of Therapy (HAT)	18 months and in three treatment phases	unclear	All residents filled in the Helpful Aspects of Therapy sheet after their weekly therapies; those who ended the treatment phase were interviewed using the Change Intervie Each participant then contributed to three assessment stages. In the first stage, sociodemographic data and drug use history were collected. The participants carried out the first stage during the first week of the treatment phas…	unclear	A total of 427 documents were analysed using grounded theory data procedures.	We applied the grounded theory procedures, as defined byStrauss and Corbin (1998), to construct theories about theprocess of change based on drug users’reports about theirown experience of change
Jarvie, R. (2017). Lived experiences of women with co-existing BMI≥30 and Gestational Diabetes Mellitus. Midwifery, 49, 79-86.	Jarvie	2017	Lived experiences of women with co-existing BMI≥30 and Gestational Diabetes Mellitus	Midwifery	UK	The dataset was analysed crosssectionally (synchronically) and longitudinally (diachronically).	The aim of the study was to explore the lived experiences of women with co-existing maternal obesity (BMI ≥ 30) and GDM during pregnancy and the post-birth period ( < 3 months post-birth).	Pregnant women having co-existing maternal obesity and Gestational Diabetes Mellitus (GDM)	Lived experiences during pregnancy and post-birth period	during	diabetic antenatal clinics at two NHS hospital trusts in the South West of England	no		other	A qualitative, sociological design	Rubin, I.S., Rubin, H.J., 2005. Qualitative Interviewing: The Art of Hearing Data 2nd. ............... Murray, S.A., Kendall, M., Carduff, E., Worth, A., Harris, F.M., Lloyd, A., Cavers, D., Grant, L., Sheikh, A., 2009. Use of serial qualitative interviews to understand patients' evolving experiences and needs. British Medical Journal 339, b3702.	One	Interviews and reflective fieldnotes	No	9 months	Unclear	Twenty-seven women took part in a total of 63 interviews. Thirteen women undertook a series of three interviews, 10 a series of two interviews and four women were interviewed once. …………. Fieldwork took place from 2011 to 2012 and women typically remained in the study over the course of 6–9 months. All participants provided written informed consent before each interview.	27	63 interviews.	The dataset was analysed crosssectionally (synchronically) and longitudinally (diachronically).
Jee, S. D., Schafheutle, E. I., & Noyce, P. R. (2017). Using longitudinal mixed methods to study the development of professional behaviours during pharmacy work-based training. Health & Social Care in the Community, 25(3), 975-986.	Jee, Schafheutle and Noyce	2017	Using longitudinal mixed methods to study the development of professional behaviours during pharmacy work-based training	Health & Social Care In The Community	UK	A prospective, longitudinal mixed-methods approach was adopted	the aim of this study was to explore factors associated with changes in professional behaviours of trainees longitudinally during pre-registration training in pharmacy	the learner (trainee) and their main supervisor (tutor)within different setting in pharmacy	development of professional behaviours during pharmacy work-based training	changes in professional behaviours of trainees longitudinally during pre-registration training	different sectors and settings in pharmacy	no		other	A prospective, longitudinal mixed-methods approach	King N. (2004) Using templates in the thematic analysis of texts. In: G.E. Symon & C.E. Cassell (Eds) Qualitative Methods and Analysis in Organizational Research: A Practical Guide, pp. 256–270. SAGE, London.	One	Interviews were conducted during 2011/2012: trainees were interviewed at the beginning of the training year, in months 4 and 9 and approximately 4 months following registration; their tutors were interviewed at two time points (months 1 and 9; Figure 1)	yes	49 weeks	trainees 4 time points, tutors 2 time points	Interviews were conducted during 2011/2012: trainees were interviewed at the beginning of the training year, in months 1, 4 and 9 and approximately 4 months after registration; their tutors were interviewed at two time points in months 1 and 9	20 trainees and their 21 tutors	120	Interviews were analysed thematically using template analysis, and questionnaires were analysed using ANOVA and t-tests.
Jensen, J. F., Overgaard, D., Bestle, M. H., Christensen, D. F., & Egerod, I. (2017). Towards a new orientation: A qualitative longitudinal study of an intensive care recovery programme. Journal of Clinical Nursing, 26(1), 77-90.	Jensen, Overgaard, Bestle, Christensen and Egerod	2017	Towards a new orientation: a qualitative longitudinal study of an intensive care recovery programme	Journal Of Clinical Nursing	Denmark	qualitative longitudinal study (title)	The aim of the study was to describe the patient experience of ICU recovery from a longitudinal perspective by analysing follow-up consultations at three time-points.	patient at ICU	experience of ICU recovery from a longitudinal perspective	recovery from a longitudinal perspective by analysing follow-up consultations at three time-points.	Intensive care unit. …………… This study was conducted at 10 level II–III Danish ICUs; one cardiac and nine general ICUs with a range of 4–14 ICU beds.	yes	The study was an adjunct to a randomised controlled trial, the RAPIT study (Recovery and Aftercare in Post Intensive care Therapy patient) testing the effectiveness of an ICU programme for improving psychological recovery one year after ICU discharge. ................... The intervention in the RAPIT study was a nurse-led ICU recovery programme aimed at promoting empowerment through three planned…	other	A descriptive multicenter longitudinal qualitative design	Malterud K (2001b) Qualitative research: standards, challenges, and guidelines. Lancet 358, 483–488. Tong A, Sainsbury P & Craig J (2007) Consolidated criteria for reporting qualitative research (COREQ): a 32item checklist for interviews and focus groups. International Journal for Quality in Health Care 19, 349–357. Riessman CK (1993) Narrative Analysis. Sage, Newbury Park, CA, pp. 1–70. Frank AW…	several	Three types of qualitative data were generated: (1) audio-recordings of consultations, (2) patient photographs and (3) completed reflection sheets.	no	between 9 and 11 months depending upon case	4 (showed in figure, photographs in hospital, one follow up consultations in hospital, two by phone after going home.)	Each patient was consecutively enrolled in RAPIT and was offered three consultations. ……….. Adult relatives chosen by the patient were invited to participate in consultations. We selected a subsample of 36 audio-recorded consultations and 68 photographs from 12 patients in the intervention arm, who had received all three consultations. ............ Patient photographs were inspired by theory of d…	12	Adult relatives chosen by the patient were invited to participate in consultations. We selected a subsample of 36 audio-recorded consultations and 68 photographs from 12 patients in the intervention arm, who had received all three consultations.	inductive thematic analysis
Jensen, A. M., Pedersen, B. D., Olsen, R. B., & Hounsgaard, L. (2019). Medication and care in Alzheimer's patients in the acute care setting: A qualitative analysis. Dementia, 18(6), 2173-2188.	Jensen, Pedersen, Olsen, Hounsgaard and Jensen	2019	Medication and care in Alzheimer's patients in the acute care setting: A qualitative analysis	Dementia	Denmark	longitudinal data (abstract)	The aim of the study was to investigate how oral medicine was administered to hip fracture patients with Alzheimer’s disease during acute hospital admission on an orthopaedic ward.	patients with an Alzheimer’s diagnosis	how oral medicine was administered	unclear	The setting for the study was a hip fracture unit on an orthopaedic surgery ward in a general hospital in Denmark.	yes	The study is part of a larger prospective study on hospitalization of people with dementia in acute care settings.	other	phenomenological-hermeneutic approach ………… An ethnographic approach was taken, based on Spradley’s method of participant observation (1980) and ethnographical interview (1979).	Ricoeur, P. (1976). Interpretation theory: Discourse and the surplus ofmeaning. Fort Worth, Texas: The Texas Christian University Press Dreyer, P. S., & Pedersen, B. D. (2009). Distanciation in Ricoeur’s theory of interpretation: Narrations in a study of life experiences of living with chronic illness and home mechanical ventilation. Nursing Inquiry, 16(1), 64–73 Spradley, J. P. (1979). The ethno…	One	Observation was performed as a passive observer. Observational data were obtained from admission to discharge, in day and evening shifts, typically from 6.30 a.m. to between 9.00 p.m. and 11.00 p.m. If the observer was not present at the end of a shift, the unit was contacted by telephone to get a verbal report about activities that had taken place, but which were not recorded by direct observati…	no	0,5 months down to 4 days	not applicable	The study was designed to follow one patient at a time, for as many hours as possible during the day, to get longitudinal data on dementia care during hospital admission. …………. In all, 22 days (in three periods of four days, four days and 14 days, respectively) were spent observing patients (P1, P2 and P3) and staff on the ward. In total, 37 shifts were covered.	3	257 hours of observation	phenomenological-hermeneutic approach
Jensen, A. M., Pedersen, B. D., Olsen, R. B., Wilson, R. L., & Hounsgaard, L. (first published 2018). "If only they could understand me!" Acute hospital care experiences of patients with Alzheimer's disease. Dementia, 2020, 19(7) 2332-2353.	Jensen, Pedersen, Olsen, Wilson and Hounsgaard	2018	If only they could understand me! Acute hospital care experiences of patients with Alzheimer's disease	Dementia	Denmark	The study was designed to follow only a few patients, but a great effort was made tocapture longitudinal observation data, covering the whole admission, to gain in-depthknowledge of the hospital stay as the observed experienced by the patient.	The aim of this study was to investigate the observed experiences of patients with Alzheimer’s of receiving care in an acute hospital setting. This paper investigates the care of patients with Alzheimer’s disease in an acute setting, as co-morbidity to a hip fracture, and focuses on patients’ experiences of careduring admission.	Patients with dementia receiving acute care	Experience of patients	unclear	The setting was a hip fracture unit in an orthopaedic surgery ward in an acute hospital inDenmark.	no		Ethnography		Spradley, J. P. (1980).Participant observation. Fort Worth, Texas: Harcourt Brace College Publishers Ricoeur, P. (1976).Interpretation theory: Discourse and the surplus of meaning. Fort Worth, Texas: TheTexas Christian University Press. Dreyer, P. S., & Pedersen, B. D. (2009). Distanciation in Ricoeur’s theory of interpretation: Narrationsin a study of life experiences of living with chronic illn…	One	participant observation Field notes were transcribed as a single coherenttext following the conclusion of the whole observation period for each patient	No	To gather longitudinal data on a patient’s hospital stay, observation was conducted from admission to discharge, every day, on both day and evening shifts, the three patients spend 4 to 14 days in hospital. And were observed for between 6 and 25 shifts.	continious	To gather longitudinal data on a patient’s hospital stay, observation was conducted from admission to discharge, every day, on both day and evening shifts, typically commencing Dementia 0(0) from 6.30 am and concluding between 9.00 pm and 11.00 pm each day. Observations were limited to one patient at any one time.	3	In total, observations were conducted during 37 shifts and totalled 257 hours of observation of patients on the ward. Additional information about the patients can be found in Table 1.	Ricoeur’s theory of interpretation, the data were analysed using threeconsecutive stages: Naı ̈ve reading, structural analysis, and critical interpretation and discus-sion
Jindal-Snape, D., Johnston, B., Pringle, J., Kelly, T. B., Scott, R., Gold, L., & Dempsey, R. (2019). Multiple and multidimensional life transitions in the context of life-limiting health conditions: Longitudinal study focussing on perspectives of young adults, families and professionals. BMC Palliative Care, 18(1), 30-30.	Jindal-Snape, Johnston, Pringle, Kelly, Scott, Gold and Dempsey	2019	Multiple and multidimensional life transitions in the context of life-limiting health conditions: longitudinal study focussing on perspectives of young adults, families and professionals	BMC Palliative Care	UK	This qualitative study used a longitudinal design (abstract)	(1) What multiple and multi-dimensional transitions are Young Adults experiencing due to their life-limiting health conditions and developmental stage? (2) What multiple and multi-dimensional transitions are significant others experiencing due to the life-limiting health conditions and developmental stage of the YAs?	yong adults with life limiting disease and their significant others, health-care providers	transitions due to life limiting health conditions	transitions	Primary diagnoses included Duchenne Muscular Dystrophy (n = 6), Cerebral Palsy (n = 2), Congenital Heart Disease (n = 1), other rare conditions (n = 3). Rare conditions are not specified to protect the identity of the participants. Geographically, participants were from rural to city locations across Scotland.	no		other	The study adopted a longitudinal, mixed methods approach underpinned by social constructionism	26. Crotty M. The foundations of social research: meaning and perspective in the research process. California: Sage Publications; 1998. 27. Richardson L, St Pierre EA. Writing: a method of inquiry. In: Denizen N, Lincoln Y, editors. The sage handbook of qualitative research. 3rd ed. Thousand Oaks, CA: Sage Publications; 2005. p. 959–78. 28. Clark A, Moss P. Listening to young children: the mosaic…	One	individual interviews	no	6 months	3 with patients, (family members and professionals 2 time points)	Data collection was undertaken over a 6-month period and involved serial data, gathered at 3 time points, each approximately 2 months apart.	10 young adults, 10 family members (included grandfather, grandmother, mother (n = 5), father, younger brother and older sister.), 11 providers (The professionals included six social care support workers, one social worker, two nurses, one general practitioner and one consultant.)	younger adults interviews 28, family members 14, professionals 16	thematic analysis
Johannessen, A., Engedal, K., Haugen, P. K., Dourado, M. C. N., & Thorsen, K. (2019). Coping with transitions in life: A four-year longitudinal narrative study of single younger people with dementia. Journal of Multidisciplinary Healthcare, 12, 479-492.	Johannessen, Engedal, Haugen, Dourado and Thorsen	2019	Coping with transitions in life: a four-year longitudinal narrative study of single younger people with dementia	Journal Of Multidisciplinary Healthcare	Norway	a four-year longitudinal narrative study (title) ……….. A longitudinal qualitative approach (abstract)	Therefore, we have performed a longitudinal study aiming to explore how people living alone with YOD experiences of coping with transitions during the progression of dementia.	people living alone with younger onset dementia (YOD <65 years)	experiences of coping with transitions during the progression of dementia	transitions and during the progression of dementia	from the southern and western parts of Norway. They were recruited from six memory clinics.	no		other	The study is a longitudinal explorative, narrative descriptive study ……… analysis describe grounded theory	42. Denzin N, Lincoln Y. The SAGE Handbook ofQualitative Research. London: Sage Publications Ltd; 2011. 43. Solomon P, Nixon S, Bond V, Cameron C, Gervais N. Two approaches to longitudinal qualitative analyses in rehabilitation and disability research. Disabil Rehabil. 2019;1–7. doi:10.1080/ 09638288.2019.1602850 44. Chase SE. Still the field in the making. In: Denzin N, Lincoln YS, editors. The …	One	individual interviews	no	48 months (up to)	8 (up to)	Individual qualitative interviews were conducted every six months with a series of up to eight interviews with the participants. The first took place at inclusion in 2014, three to six months after the diagnosis was ascertained, and the remaining seven interviews took place every six months thereafter.	10	60 interviews, the total time for all the interviews was 1,693 mins	We used a reformulated analytical method approach of Grounded Theory. Corbin J, Strauss
Johannessen, A., Engedal, K., Haugen, P. K., Dourado, M. C. N., & Thorsen, K. (2018). "To be, or not to be": Experiencing deterioration among people with young-onset dementia living alone. International Journal of Qualitative Studies on Health and Well-Being, 13(1), 1490620-1490620.	Johannessen, Engedal, Haugen, Dourado and Thorsen	2018	To be, or not to be: experiencing deterioration among people with young-onset dementia living alone	International Journal Of Qualitative Studies On Health And Well-Being	Norway	A longitudinalstudy using a qualitative approach was used. The study is a longitudinal explorative, descriptive studywith a duration of 2 years.	aiming to explore the existential experiences and coping of people with YOD (age at onset of dementia before 65 years of age) , as they narrate the deterioration due to dementia that they go through over time.	people with YOD (age at onset of dementia before 65 years of age) of both genders and living alone, from the southern and western parts of Norway.	existential experiences and coping	over time	Western part of Norway, memory clinics	no		Grounded theory	The study is a longitudinal explorative, descriptive study	Denzin, N. K., & Lincoln, Y. S. (2011).The SAGE handbook ofqualitative research. London: Sage Publication Ltd. Kvale, S., & Brinkmann, S. (2010).Det kvalitative forskningsin-tervju [The qualitative research interview]. Oslo, Norway:Gyldendal Norsk Forlag AS [Gyldendal NorwegianPublisher AS. Corbin, J., & Strauss, A. (2008).Basics of qualitative research.Los Angeles, CA: Sage Publications Ltd.	One	Individual qualitative interviews were conducted five times.	no	24 months	5	ndividual qualitative interviews were conducted five times. The first took place atthe inclusion (2014), and the other four interviews took place every 6 months thereafter.	10	42 interviews = 1267 minutes	grounded theory Corbin JM, Strauss AL. Basics of qualitative research : techniques
Johansen, F., Loorbach, D., & Stoopendaal, A. (2018). Exploring a transition in Dutch healthcare. Journal Of Health Organization And Management, 32(7), 875-890.	Johansen, Loorbach and Stoopendaal	2018	Exploring a transition in Dutch healthcare	Journal Of Health Organization And Management	the Netherlands	Data were collected in a longitudinel study	The purpose of this paper is to explore the contours of this transition in the Netherlands.	health care organisations/project manager	Counters of transition	transition	The data were collected in a longitudinal study by examining the activities anddevelopment of eight Dutch healthcare organisations participating in the expedition andfollowing the impact three years beyond the scope of the actual programme	no		other	experimental empirical work	none	One	semi-structured interview	no	36 months	3	During this three-year period, yearly semi-structured interviews were conducted with the main project managers at the network as well as representatives from the eight healthcare organisations participating in the expedition, totalling 33 interviews with 22 interviewees.	22	33 interviews with 22 interviewees. On average, the interviews lasted 1 to 1.5 h	not named
Jones, K. F., Dorsett, P., Simpson, G., & Briggs, L. (2018). Moving forward on the journey: Spirituality and family resilience after spinal cord injury. Rehabilitation Psychology, 63(4), 521-531.	Jones, Dorsett, Simpson and Briggs	2018	Moving forward on the journey: Spirituality and family resilience after spinal cord injury	Rehabilitation Psychology	Australia	A qualitative longitudinal study design	The aim of this exploratory study was to consider how spirituality (encompassing meaning, hope and purpose), may facilitate family resilience after SCI over time	Ten family dyads (10 individuals with SCI, 10 family members) were recruited from the spinal injury unit (SIU) of a rehabilitation hospital in Sydney, Australia.	how spirituality may facilitete family resilience	over time	spinal injury unit (SIU) of a rehabilitationhospital in Sydney, Australia	yes	This study was part of a larger project investigating how spirituality may contribute to family resilience after SCI, incorporating both a quantitative (cross-sectional) and qualitative (longitudinal) component.	Phenomenology	This study was situated within a phenomenological framework, focused upon understanding and exploring participants’ lived experiences of spirituality after SCI (Langdridge, 2007; Patton, 2015).	Braun, V., & Clarke, V. (2006). Using thematic analysis in psychology.Qualitative Research in Psychology, 3,77–101.http://dx.doi.org/10.1191/1478088706qp063oa Lund Research. (2012). Non-probability sampling.Laerd Dissertation.Retrieved Shenton, A. K. (2004). Strategies for ensuring trustworthiness in qualita-tive research projects.Education for Information, 22,63–75.http://dx.doi.org/10.3233/EFI-…	One	joint interviews	no	6 months	2	Two interviews were conducted with each dyad. The first was held at the SIU (time since injury ranging from 2 to 11 months).The second interview was held 6 months later, when the majority of individuals with SCI had been discharged to the community	20 (2 per dyads)	Nine of the 10 families completed all interviews. Total 19 interviews	thematic analysis Braun and Clarke 2006
Kerrissey, M., Satterstrom, P., Leydon, N., Schiff, G., & Singer, S. (2017). Integrating: A managerial practice that enables implementation in fragmented health care environments. Health Care Management Review, 42(3), 213-225.	Kerrissey, Satterstrom, Leydon, Schiff and Singer	2017	Integrating: A managerial practice that enables implementation in fragmented health care environments	Health Care Management Review	US	Using an embedded multiple case study design, we leverage a longitudinal data set of field notes, meeting minutes, and interviews (abstract)	Our uniquely granular longitudinal data from 16 primary care clinics enable us to deeply explore the mechanisms that frontline workers use to overcome implementation barriers.	frontline workers at primary care clinics	mechanisms that frontline workers use to overcome implementation barriers	to overcome implementation barriers	primary care clinics	yes	We intensively studied an improvement project aimed at reducing malpractice risk and improving patient safety in adult ambulatory care clinics (Singer et al., 2015). This project was funded by the Agency for Healthcare Research andQuality andwas called PROMISES (ProactiveReduction of Outpatient Malpractice: Improving Safety, Efficiency, and Satisfaction). PROMISES focused on process improvements …	case study	mbedded multiple case study design	Creswell, 1998) Eisenhardt, K. (1989). Building theories from case study research. Academy ofManagement Review, 14(4), 532Y550. Glaser & Strauss, 1967	several	Our qualitative data included three sources: (1) field notes from observation of clinic meetings and improvement-related activities, (2) meeting minutes, and (3) postproject interviews with all clinics.	yes	15 months	unclear	One author acted as a participant-observer in the role of improvement advisor and spent on average 1 hour a month with each clinic over the 15-month process. He and a second improvement advisor also reported each week to a research team on their direct observations, amounting to 51 meetings over time, which a second author transcribed. The two advisors also kept field notes during their visits an…	unclear, 16 clinics	One author acted as a participant-observer in the role ofBimprovement advisor[ and spent on average 1 hour a month with each clinic over the 15-month process. He and a second improvement advisor also reported each week to a research team on their direct observations, amounting to 51 meetings over time, which a second author transcribed. The two advisors also kept field notes during their visits a…	constant comparative method
Kirshbaum, M. N., Ennis, G., Waheed, N., & Carter, F. (2017). Art in cancer care: Exploring the role of visual art-making programs within an Energy Restoration Framework. European Journal Of Oncology Nursing, 29, 71-78.	Kirshbaum, Ennis, Waheed and Carter	2017	Art in cancer care: Exploring the role of visual art-making programs within an Energy Restoration Framework	European Journal Of Oncology Nursing	Australia	A longitudinal, qualitative, single cohort study (abstract)	The aim of the study was to explore the experience of participation in a visual art-making program for people during or after cancer treatment in the Northern Territory of Australia, using a framework for energy restoration. The objectives of the study were: 1. To set up and facilitate an eight-week group experiential visual art-making program for people who have been diagnosed with cancer. 2. To…	people who have been diagnosed with cancer	experience of participation in a visual art-making program for people during or after cancer treatment	during or after cancer treatment	during or after cancer treatment in the Northern Territory of Australia ………….. A convenience sample was selected through local community networks, media and the Cancer Council NT (Northern Territory), who sent out a brief email and flyer about the study.	not stated		other	A longitudinal, qualitative, single cohort study	King, N., 1998. Template analysis. In: Symon, G., Cassell, C. (Eds.), Qualitative Methods and Analysis in Organizational Research. Sage, London. Crabtree, B.F., Miller, W.L., 1999. Using codes and code manuals: a template organizing style of interpretation. In: Crabtree, B.F., Miller, W.L. (Eds.), Doing Qualitative Research, second ed. Sage, Newbury Park, California. Brooks, J., McCluskey, S., Tu…	several	Data were collected before, during and after the art-making sessions by interviews and group discussions.	no	2 months (8 weeks)	unclear	Data were collected before, during and after the art-making sessions by interviews and group discussions. Each week prior to art-making, a pre-session group discussion was held for five to ten minutes to ‘check in and feedback’ on the previous week's session and audio-recorded. The group members were asked about how they felt about the previous week's activity, In-depth, post intervention intervi…	The sample consisted of eight women	not described	Template Analysis approach
Klinga, C., Hasson, H., Andreen Sachs, M., & Hansson, J. (2018). Understanding the dynamics of sustainable change: A 20-year case study of integrated health and social care. BMC Health Services Research, 18(1), 400-400.	Klinga, Hasson, Andreen Sachs and Hansson	2018	Understanding the dynamics of sustainable change: A 20-year case study of integrated health and social care	BMC Health Services Research	Sweden	To study intersectoral cooperation, a retrospective and qualitative case-study research design was applied basedon data from the model organisation’s steering-committeeminutes from 1995 through 2015.	The specific objective of this study is to gain insight into the dynamics of sustainable changes in integrated health and social care through an analysis of local actions that were trigged by a national policy.	data, minutes of the model organization's steering-committee from 1995-2015	the dynamics of sustainable changes in integrated health and social care	changes	The area of Sweden in which the inter-sectoral cooperation took place has a long record of providing integrated health and social care, with the county councilproviding psychiatric care and the municipality providing social services	no		Case study	A retrospective and qualitative case-study research design	Braun V, Clarke V. Using thematic analysis in psychology. Qual Res psychol.2006;3:77–101. https://doi.org/10.1191/1478088706qp063oa.	One	Documents. minutes of steering group of a bigger organization over 20 years organisation's	no	More than 240	unclear, approximately 3-5 meetings per semester, fewer in recent years	Data were collected from the minutes of all steering-committee meetings held from 1995 through 2015. The minutes were available in digital form (n= 98; approxi-mately 3-5 meetings per semester, fewer in recent years)and followed the same basic structure.	unclear	98 documents This study’s data included a large amount of information generated overtwenty years	Thematic analysis, as Braun and Clarke [34] described,
Kowalski, C. P., McQuillan, D. B., Chawla, N., Lyles, C., Altschuler, A., Uratsu, C. S., Bayliss, E. A., Heisler, M., & Grant, R. W. (2018). 'The hand on the doorknob': Visit agenda setting by complex patients and their primary care physicians. Journal of the American Board of Family Medicine, 31(1), 29-37.	Kowalski, McQuillan, Chawla, Lyles, Altschuler, Uratsu, Bayliss, Heisler and Grant	2018	'The Hand on the Doorknob': Visit Agenda Setting by Complex Patients and Their Primary Care Physicians	Journal Of The American Board Of Family Medicine	US	We conducted a longitudinal, qualitative study in 3geographically diverse health care settings:	to investigate how patients and physicians prepare for visits, how visit agendas are determined, and how discussion priorities are established during time-limited visits. 1) examine how patients and physicians prepared for upcoming visits; 2) gain further insight into how agendas are set during visits; and 3) identify factors that facilitate or impede alignment of visit agendas.	patients (n 40) and their primary care physicians (n 17)	patients and physicians prepare for visits	unclear	hospital-based and community-based practicesin 3 geographically diverse health care settings in US	no		other	longitudinal, qualitative study	Mason J. Qualitative researching. Thousand Oaks,CA: Sage Publications; 2002.12. Patton MQ. Enhancing the quality and credibility ofqualitative analysis. Health Serv Res 1999;34(5 Pt2):1189–208.13. Hsieh HF, Shannon SE. Three approaches to qual-itative content analysis. Qual Health Res 2005;15:1277–88.	One	sequential interviews	no	unclear about a week	3 (patient, provider, patient)	The interviews proceeded sequentially in a longitudinal design with patient then PCP then patient again; patient priorities were shared with the PCP after the PCP listed their priorities for each patient. The interviews with the patients were most often collected in the weeks before a scheduled visitor in the clinic on the same day of their visit before being seen. Discussions with physicians occ…	We conducted sequential interviews with complex patients (n =40) and their primary care physicians (n = 17)	once phycisiaans, twice with patients ca 97	content analysis
Križaj, T., Warren, A., & Slade, A. (2018). "Holding on to what I do": Experiences of older slovenians moving into a care home. Gerontologist, 58(3), 512-520.	Križaj, Warren and Slade	2018	Holding on to What I Do: Experiences of Older Slovenians Moving into a Care Home	Gerontologist	Slovenia	Longitudinal research approach	to explore Slovenian older people’s experiences of transition into a care home and how it influenced their everyday engagement in meaningful occupations	Slovenian older people	experiences of transition into a care home	transition	home environment, hospital and care home	no	no	Phenomenology	IPA	Clarke, C. (2009). An introduction to interpretative phenomenological analysis: A useful approach for occupational therapy research. British Journal of Occupational Therapy, 72, 37–39. doi:10.1177/030802260907200107 Finlay, L. (2011). Phenomenology for therapists: Researching the lived world. Chichester, UK: Wiley-Blackwell. doi:10.1002/9781119975144 Patton, M. Q. (2015). Qualitative research and…	One	Semistructured, in-depth interviews Interview guide questions covered topics relating to daily routines, meaningful occupations, and relocation.	no	6 months	3	before the relocation, 1 month, and 6 months after relocation. At the time of the first interviews, four participants were in their home environment; however, one participant was in hospital and one participant had already relocated. At the time of the first interviews, four participants were in their home environment; however, one into a care home 5 days prior to the interview. All second and th…	6	18 interviews	IPA
Laerkner, E., Egerod, I., Olesen, F., & Hansen, H. P. (2017). A sense of agency: An ethnographic exploration of being awake during mechanical ventilation in the intensive care unit. International Journal of Nursing Studies, 75, 1-9.	Laerkner, Egerod, Olesen and Hansen	2017	A sense of agency: An ethnographic exploration of being awake during mechanical ventilation in the intensive care unit	International Journal of Nursing Studies	Denmark	A longitudinal perspective was obtained through 13 months of fieldwork (abstract)	The study aimed to explore patients’ experiences of being awake during critical illness and mechanical ventilation in the ICU.	patients’ being awake during critical illness and mechanical ventilation in the ICU	experiences of being awake during critical illness and mechanical ventilation in the ICU	being awake during critical illness	Intensive care unit. The context of the study consisted of two level three medical-surgical adult ICUs (unit A and B) at a university hospital in Denmark.	no		other	The study was based on Interpretive Description, an applied inductive, qualitative approach inspired by ethnography, grounded theory and phenomenology (Thorne, 2016; Thorne et al., 2016).	Thorne, S., Kirkham, S.R., Macdonald-Emes, J., 1997. Interpretive description: a noncategorical qualitative alternative for developing nursing knowledge. Res. Nurs. Health 20, 169–177. Thorne, S., Stephens, J., Truant, T., 2016. Building qualitative study design using nursing’s disciplinary epistemology. J. Adv. Nurs. 72, 451–460. Thorne, S.E., 2016. Interpretive Description: Qualitative Research…	several	Observations and interviews. Based on the ethnographic approach (Emerson et al., 2011; Spradley, 1980), we chose participant observation in ICU and post-ICU interviews to get close to everyday patient experiences. Data were generated during 13 months of fieldwork in two ICUs (August 2011–February 2012, and September 2012–February 2013). Patients were interviewed once during the first week after I…	no	4 to 2 months differed between participants not clear why.	3 (1 observations at ICU, 2 interviews)	we chose participant observation in ICU and post-ICU interviews to get close to everyday patient experiences. Data were generated during 13 months of fieldwork in two ICUs (August 2011–February 2012, and September 2012–February 2013). Patients were interviewed once during the first week after ICU discharge followed by a second interview after two to four month. .............. The first interview …	28	Twenty-eight patients were observed between one and six days, and 22 patients were invited to participate in the interviews. ……….. Twenty patients participated in the first interview, and only 13 in the second interview as five patients died and two had worsened between interviews. Seventeen patients participated in observations as well as interviews; A total of 102 days with observations between…	qualitative, descriptive and interpretive thematic analysis (Thorne, 2016).
Lagsten, J., & Andersson, A. (2018). Use of information systems in social work - challenges and an agenda for future research. European Journal of Social Work, 21(6), 850-862.	Lagsten and Andersson	2018	Use of information systems in social work - challenges and an agenda for future research	European Journal of Social Work	Sweden	longitudinal study on critical issues	The aim of this paper is therefore to contribute to the emerging social work information systems research agenda. Research questions: What are the challenges in the use of a social work information system in a Swedish social work agency according to the stakeholders? How do the empirically grounded challenges relate to the literature on the use of social work information systems? What are the imp…	Social workers … from five different units in a social work agency	stakeholder evaluation of the use and management of information systems in social work practice	unclear	A Swedish social work agency usisng aCase Management System	yes	The purpose of the evaluation in 2007 was to evaluate the system from different stakeholders’ perspectives, and the evaluation object was defined as ‘[t]he system as a tool for case handling in the social work practice’ (Lagsten, 2007). The main question from the project originator was if it was about time to terminate the information system or if the current system satisfied organisational needs…	Case study		Guba, E., & Lincoln, Y. (1989). Fourth generation evaluation. Newbury Park, CA: Sage.	Several	Individual interviews Dialogue seminars Document analysis Observations	no	10 years=120 months (2007, 2012, 2016)	3 (2007, 2012, 2016)	The research has been conducted in four steps: (1) an extensive evaluation of the system in 2007, (2) document analysis of the problem inventory underlying a new requirement specification in 2012, (3) re-visits to the stakeholders in 2016 in order to find out which challenges still remain and (4) comparison of empirical findings with the research literature in order to identify research themes im…	70 individuals participated in 16 dialogue seminars (2007)	Not specified	Guba and Lincolns stakeholder model of evaluation
Lahav, O., Daniely, N., & Yalon-Chamovitz, S. (2018). Interpersonal social responsibility model of service learning: A longitudinal study. Scandinavian Journal of Occupational Therapy, 25(1), 61-69.	Lahav, Daniely and Yalon-Chamovitz	2018	Interpersonal social responsibility model of service learning: A longitudinal study	Scandinavian Journal Of Occupational Therapy	Israel	longitudinal study	The objective of this longitudinal study was to explore a structured model of Service-Learning (ISRSL), aimed towards the development of professional identity among OT students. In order to move beyond description a grounded theory approach was utilized to explore the perceptions and experiences of OT students who participated and experienced firsthand ISR-SL during their first academic year.	OT students who participated and experienced firsthand ISR-SL during theri first academic year. Young professionals 1-3 years after compleeting their B-O.T	explore the perceptions and experiences of OT students who participated and experienced firsthand ISR-SL during their first academic year.	towards the development of professional identity; through later stages as mature students; during their first year of the OT curriculum	Occupational Therapi department, Academic College	no		Grounded theory		Strauss A, Corbin J. Basics of qualitative research: grounded theory procedures and techniques. 2nd ed. Newbury Park (CA): Sage; 1998. Creswell JU. Qualitative inquiry and research design: choosing among five approaches. 3rd ed. Newbury Park (CA): Sage; 2012. Glaser B, Strauss A. The discovery of grounded theory: strategies for qualitative research. New York (NY): Aldine De Gruyter; 1967.	One	Reflective Expectation Questinnaire: The questionnaire included the following two open-ended questions: (1) If and how did the ISR-SL experience contribute to your OT studies? (2) If and how did the ISR-SL experience contribute to the process of developing your therapeutic personality?	no	Five years=60 months	4 timeponits, but individual participants contributet only twice. Follows two different cohorts.	The data was gathered longitudinally over 5 years, at 2 different time points from four different cohorts in a 3.5 years of B.O.T program: at the end of first year (N=104 out of 118 students), at the end of second year (N=41 out of 59 students), at the end of third year (N=22 out of 54 students), and after graduation (N=16 out of 71 young professionals). All students completed the questionnaire a…	total of 105 individuals (but many particiated only once)	183 questionnaires	Grounded theory analysis
Lang, H., France, E. F., Williams, B., Humphris, G., & Wells, M. (2018). The existence and importance of patients' mental images of their head and neck cancer: A qualitative study. Plos One, 13(12), e0209215-e0209215.	Lang, France, Williams, Humphris and Wells	2018	The existence and importance of patients' mental images of their head and neck cancer: A qualitative study	Plos One	Scotland	Longitudinal qualitative design	The aim of our study was to explore in detail the existence and importance of mental images of cancer among people with HNC in terms of the perceived origins and meaning of mental images, their development over time, and the relationship of their mental images to illness beliefs.	people with consecutive, newly-diagnosed head and neck cancer (HNC)	explore in detail the existence and importance of mental images of cancer among people with HNC in terms of the perceived origins and meaning of mental images.	Developpment over time	Hospital	no		Phenomenology		Smith JA, Jarman M, Osborn M. Doing interpretative phenomenological analysis. In: Murray M, Chamberlain K, editors. Qualitative Health Psychology: Theories and Methods. London: SAGE; 1999. p. 218–40	Several	Individual interviews and images/drawings	no	from three to nine-and-a-half month, mode: 5 months	2	interviews were conducted from March 2008 to June 2009. The time between first and second interviews ranged from three to nine-and-a-half months (mode: 5 months). Follow-up interviews occurred after treatment completion.	25	44 transcribed interviews	Thematic analysis guided by IPA
Larsen, S. M., Hounsgaard, L., Brandt, Å., & Kristensen, H. K. (2019). "Becoming acquainted": The process of incorporating assistive technology into occupations. Journal of Occupational Science, 26(1), 77-86.	Larsen, Hounsgaard, and Kristensen	2019	Becoming acquainted: The process of incorporating assistive technology into occupations	Journal of Occupational Science	Denmark	A qualitative longitudinal approach (abstract)	The purpose of this study was, therefore, to investigate older adults’ experiences of the process of incorporating ATs into occupations. (assistive Technology)	older adults living in their usual home and who had applied to the municipality for an AT	experiences of the process of incorporating ATs into occupations. (assistive Technology)	process	two Danish municipalities	no		other	phenomenological-hermeneutical ……………… We employed a qualitative longitudinal approach involving ethnographically inspired fieldwork guided by the work of American anthropologist James Spradley	Ricoeur, P. (1976). Interpretation theory: Discourse and the surplus of meaning (6th ed.). Fort Worth, TX: Texas Christian University Press. Dreyer, P. S., & Pedersen, B. D. (2009). Distanciation in Ricoeur’s theory of interpretation: Narrations in a study of life experiences of living with chronic illness and home mechanical ventilation. Nursing Inquiry, 16(1), 64–73. doi:10.1111/j.1440-1800.200…		Data were generated through repeated interviews (Spradley, 1979) and participant observations (Spradley, 1980) …………		up to 10 months, most were followed 1,5 months	3 planned, but up to 7	when the older adult: 1) received the AT, 2) had had the AT for a week, and 3) had had the AT for 1½ months. Besides this predetermined data collection, further data were collected on the basis of how the incorporation process transpired. In cases where participants reported, after the third predetermined occasion, that they were still practising how to use the AT, data collection continued until…	8	A total of 15 hours of individual interviews, ………. During the incorporation process, a total of 16 hours of observation were undertaken	phenomenological-hermeneutical
Laur, C., Bell, J., Valaitis, R., Ray, S., & Keller, H. (2018). The Sustain and Spread Framework: Strategies for sustaining and spreading nutrition care improvements in acute care based on thematic analysis from the More-2-Eat study. BMC Health Services Research, 18(1), 930-930.	Laur, Bell, Valaitis, Ray and Keller	2018	The Sustain and Spread Framework: strategies for sustaining and spreading nutrition care improvements in acute care based on thematic analysis from the More-2-Eat study	BMC Health Services Research	Canada	none	The aim of this manuscript is to develop a potential framework of strategies to sustain and spread the successful implementation of INPAC. (nutrition care improvements in acute care)	Staff and management at five hospital sites (medical units	???	unclear	Acute care in a single medical unit in five Canadian hospitals	yes	The More-2-Eat project facilitated implementation of INPAC, an evidence and expert consensus based ‘best practice’ pathway, in a single medical unit in each of five Canadian hospitals in four provinces	other	Participatory action research	Baum F, MacDougall C, Smith D. Participatory action research. J Epidemiol Community Heal. 2006;60:854–7. Michie S, van Stralen M, West R. The behaviour change wheel: a new method for characterising and designing behaviour change interventions. Implement Sci. 2011;6:42. Holstein JA, Gubrium JF. The active interview. Thousand Oaks: Sage Publications; 1995. Miles M, Huberman A, Saldana J. Qualitativ…	Several	Individual interviews Focus Groups small group discussions	not described	14 months (2+12+2)	2 T1 = Postimplementation T2=sustainability phase	Two-day visits for KI, FG and small group discussions were conducted .... after implementation. A minimum of 2 FG (4–10 people/group) and 6 interviews were conducted per site; 7 interviews were conducted by phone for participants unavailable during the visit. Purposive sampling was used for interviews so that valuable insight, both positive and negative, could be elicited; interviews were conduct…	136	a total amaount of 138 persons were involved	Thematic analysis guided by IPA
Lawton, J., Blackburn, M., Rankin, D., Allen, J. M., Campbell, F. M., Leelarathna, L., Tauschmann, M., Thabit, H., Wilinska, M.E., Elleri, D., & Hovorka, R. on behalf of the APCam11 Consortium. (2019). Participants' experiences of, and views about, daytime use of a day-and-night hybrid closed-loop system in real life settings: Longitudinal qualitative study. Diabetes Technology & Therapeutics, 21…	Lawton, Blackburn, Rankin, Allen, Campbell, Leelarathna, Tauschmann, Thabit, Wilinska, Elleri and Hovorka	2019	Participants' Experiences of, and Views About, Daytime Use of a Day-and-Night Hybrid Closed-Loop System in Real Life Settings: Longitudinal Qualitative Study	Diabetes Technology & Therapeutics	UK	Longitudinal Qualitative Study (titel)	To address these objectives, we report findings from interviews undertaken with individuals who used a hybrid day-and-night closed-loop system combined with pump suspend feature over 3 months. Given that studies have overwhelmingly focused upon nighttime use, we focus our reporting on people’s experiences of using the closed-loop system during the day.	individuals who used a hybrid day-and-night closed-loop system for diabetes treatment (and the adolentce participants parents)	experiences of using the closed-loop system during the day	over 3 months	Individuals randomized to a closed loop were invited to opt-in to the interview study by staff in the four participating U.K. sites.	yes	Participants were recruited following randomization to a 3-month clinical trial (APCam11) designed to assess the effectiveness of a hybrid day-and-night closed-loop system combined with pump suspend feature compared with sensoraugmented pump therapy (control arm).	other	qualitative longitudinal study	16. Britten N: Qualitative research: qualitative interviews in medical research. BMJ 1995;311:251–253. 17. Pope C, Mays N: Qualitative research: reaching the parts other methods cannot reach: an introduction to qualitative methods in health and health services research. BMJ 1995; 311:42–45. 20. Strauss A, Corbin J: Basics of Qualitative Research: Grounded Theory Procedures and Techniques. London:…	One	Individual interviews	no	3 months	2	Participants were interviewed before commencing use of the closed-loop system (baseline) and 3 months later. This design permitted initial expectations to be compared with actual experiences of using the technology.	10 adults (‡18 years of age), 5 adolescents (13–17 years of age) and 9 parents	48 interviews	Grounded theory (but very short and a basic reference)
[truncated: 137 more rows]
